# Supplementary material for: Design, synthesis, and biological evaluation of 1,2,4-oxadiazole-based derivatives as multitarget anti-Alzheimer agents
Source: Royal Society of Chemistry journal article supplement (doi:10.1039/d4md00113c), 2024-01-01
Supplement: d4md00113c1.pdf [file d4md00113c1.pdf]

## Supplementary information

### Design, synthesis, and biological evaluation of 1,2,4-oxadiazole based derivatives as multitarget Anti-Alzheimer agents

Mohammed Salah Ayoup <sup>a,b</sup>\*, Mohamed Reda Barakat <sup>b</sup>, Hamida Abdel-Hamid <sup>b</sup>, Ehab Emam <sup>c</sup>, Yasair S. Al-Faiyz <sup>a</sup>, Aliaa A. Masoud <sup>d</sup>, Doaa A. Ghareeb <sup>d,e</sup>,  
Amr Sonousi <sup>f,g</sup>, Asmaa E. Kassab <sup>f</sup>\*

<sup>a</sup> Department of Chemistry, College of Science, King Faisal University, P.O. Box 400, Al-Ahsa 31982, Saudi Arabia.

<sup>b</sup> Chemistry Department, Faculty of Science, Alexandria University, P.O. Box 426, Alexandria, 21321, Egypt.

<sup>c</sup> General Q.C Manager, Alexandria company for pharmaceuticals, Alexandria 21521, Egypt.

<sup>d</sup> Bio-Screening and Preclinical Trial Lab, Biochemistry Department, Faculty of Science, Alexandria University, Alexandria, Egypt.

<sup>e</sup> Center of Excellence for Drug Preclinical Studies (CE-DPS), Pharmaceutical and Fermentation Industry Development Center, City of Scientific Research & Technological Applications (SRTA-city), New Borg El Arab, Alexandria, Egypt.

<sup>f</sup> Department of Pharmaceutical Organic Chemistry, Faculty of Pharmacy, Cairo University, Kasr El-Aini Street, Cairo, P.O. Box 11562, Egypt.

<sup>g</sup> University of Hertfordshire hosted by Global Academic Foundation, New Administrative Capital, Cairo, Egypt.

\* **Corresponding author at** Department of Chemistry, College of Science, King Faisal University, P.O. Box 400, Al-Ahsa 31982, Saudi Arabia and Chemistry Department, Faculty of Science, Alexandria University, P.O. Box 426, Alexandria, 21321, Egypt, and Department of Pharmaceutical Organic Chemistry, Faculty of Pharmacy, Cairo University, Kasr El-Aini Street, Cairo, P.O. Box 11562, Egypt.

**Email address:** [mayoup@kfu.edu.sa](mailto:mayoup@kfu.edu.sa) , [mohammedsalahayoup@gmail.com](mailto:mohammedsalahayoup@gmail.com), & [asmaa.kassab@pharma.cu.edu.eg](mailto:asmaa.kassab@pharma.cu.edu.eg)

| Serial | Content                                     | page |
|--------|---------------------------------------------|------|
| 1.     | Copy of NMR spectra                         |      |
|        | Figure 1. <sup>1</sup> H NMR of <b>2a</b>   | S3   |
|        | Figure 2. <sup>13</sup> C NMR of <b>2a</b>  | S4   |
|        | Figure 3. <sup>1</sup> H NMR of <b>2b</b>   | S5   |
|        | Figure 4. <sup>13</sup> C NMR of <b>2b</b>  | S6   |
|        | Figure 5. <sup>1</sup> H NMR of <b>2c</b>   | S7   |
|        | Figure 6. <sup>13</sup> C NMR of <b>2c</b>  | S8   |
|        | Figure 7. <sup>1</sup> H NMR of <b>2d</b>   | S9   |
|        | Figure 8. <sup>13</sup> C NMR of <b>2d</b>  | S10  |
|        | Figure 9. <sup>1</sup> H NMR of <b>3a</b>   | S11  |
|        | Figure 10. <sup>13</sup> C NMR of <b>3a</b> | S12  |
|        | Figure 11. <sup>1</sup> H NMR of <b>3b</b>  | S13  |
|        | Figure 12. <sup>13</sup> C NMR of <b>3b</b> | S14  |
|        | Figure 13. <sup>1</sup> H NMR of <b>4a</b>  | S15  |

|                                                                    |                |
|--------------------------------------------------------------------|----------------|
| Figure 14. $^{13}\text{C}$ NMR of <b>4a</b>                        | <b>S16</b>     |
| Figure 15. $^1\text{H}$ NMR of <b>4b</b>                           | <b>S17</b>     |
| Figure 16. $^{13}\text{C}$ NMR of <b>4b</b>                        | <b>S18</b>     |
| Figure 17. $^1\text{H}$ NMR of <b>6</b>                            | <b>S19</b>     |
| Figure 18. $^{13}\text{C}$ NMR of <b>6</b>                         | <b>S20</b>     |
| Figure 19. $^1\text{H}$ NMR of <b>9a</b>                           | <b>S21</b>     |
| Figure 20. $^{13}\text{C}$ NMR of <b>9a</b>                        | <b>S22</b>     |
| Figure 21. $^1\text{H}$ NMR of <b>9b</b>                           | <b>S23</b>     |
| Figure 22. $^{13}\text{C}$ NMR of <b>9b</b>                        | <b>S24</b>     |
| Figure 23. $^1\text{H}$ NMR of <b>9c</b>                           | <b>S25</b>     |
| Figure 24. $^{13}\text{C}$ NMR of <b>9c</b>                        | <b>S26</b>     |
| Figure 25. $^1\text{H}$ NMR of <b>12</b>                           | <b>S27</b>     |
| Figure 26. $^{13}\text{C}$ NMR of <b>12</b>                        | <b>S28</b>     |
| Figure 27. $^1\text{H}$ NMR of <b>13a</b>                          | <b>S29</b>     |
| Figure 28. $^{13}\text{C}$ NMR of <b>13a</b>                       | <b>S30</b>     |
| Figure 29. $^1\text{H}$ NMR of <b>13b</b>                          | <b>S31</b>     |
| Figure 30. $^{13}\text{C}$ NMR of <b>13b</b>                       | <b>S32</b>     |
| <b>2.</b> Figures 31-45 copy of IR spectra of the target compounds | <b>S33-S47</b> |
| <b>3.</b> Molecular modelling                                      | <b>S48</b>     |
| <b>4.</b> ADME study                                               | <b>S54</b>     |
| <b>5.</b> Biological activities detailed results                   | <b>S55</b>     |

# 1. Copy of NMR

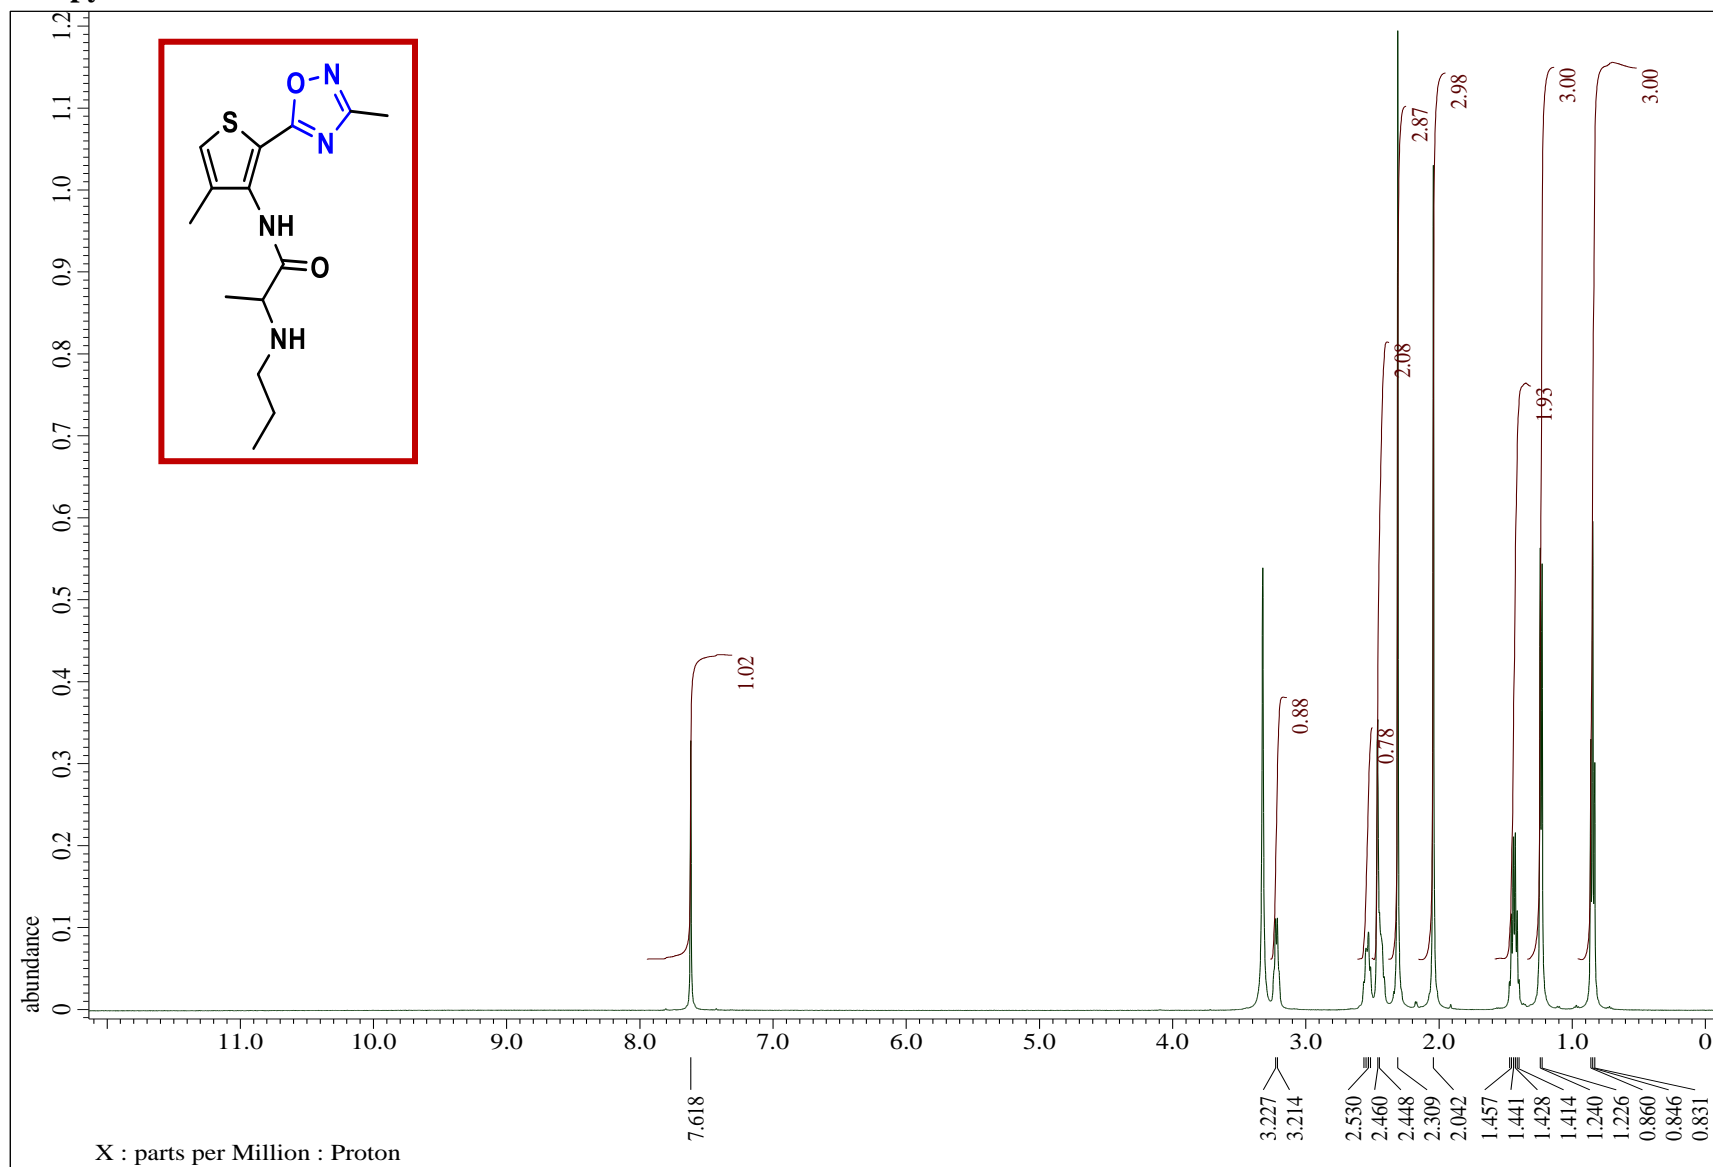

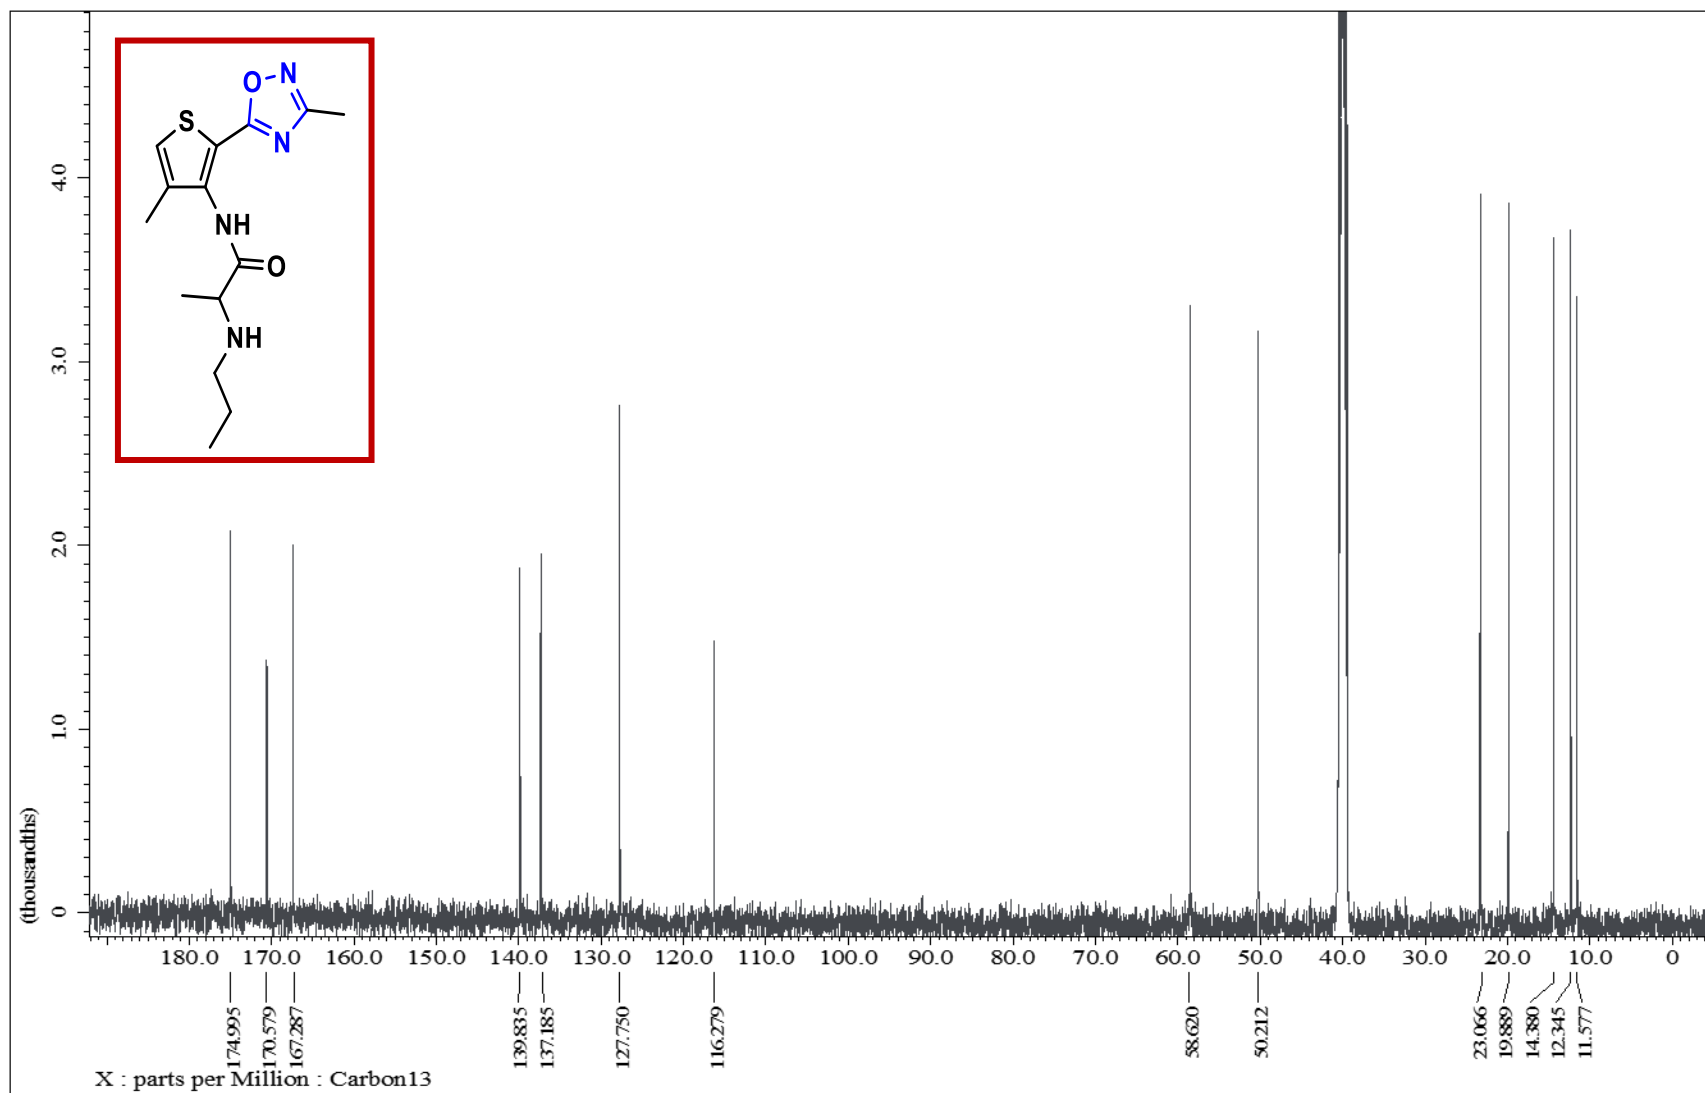

Figure 2.  $^{13}\text{C}$  NMR of 2a (DMSO- $d_6$ ).

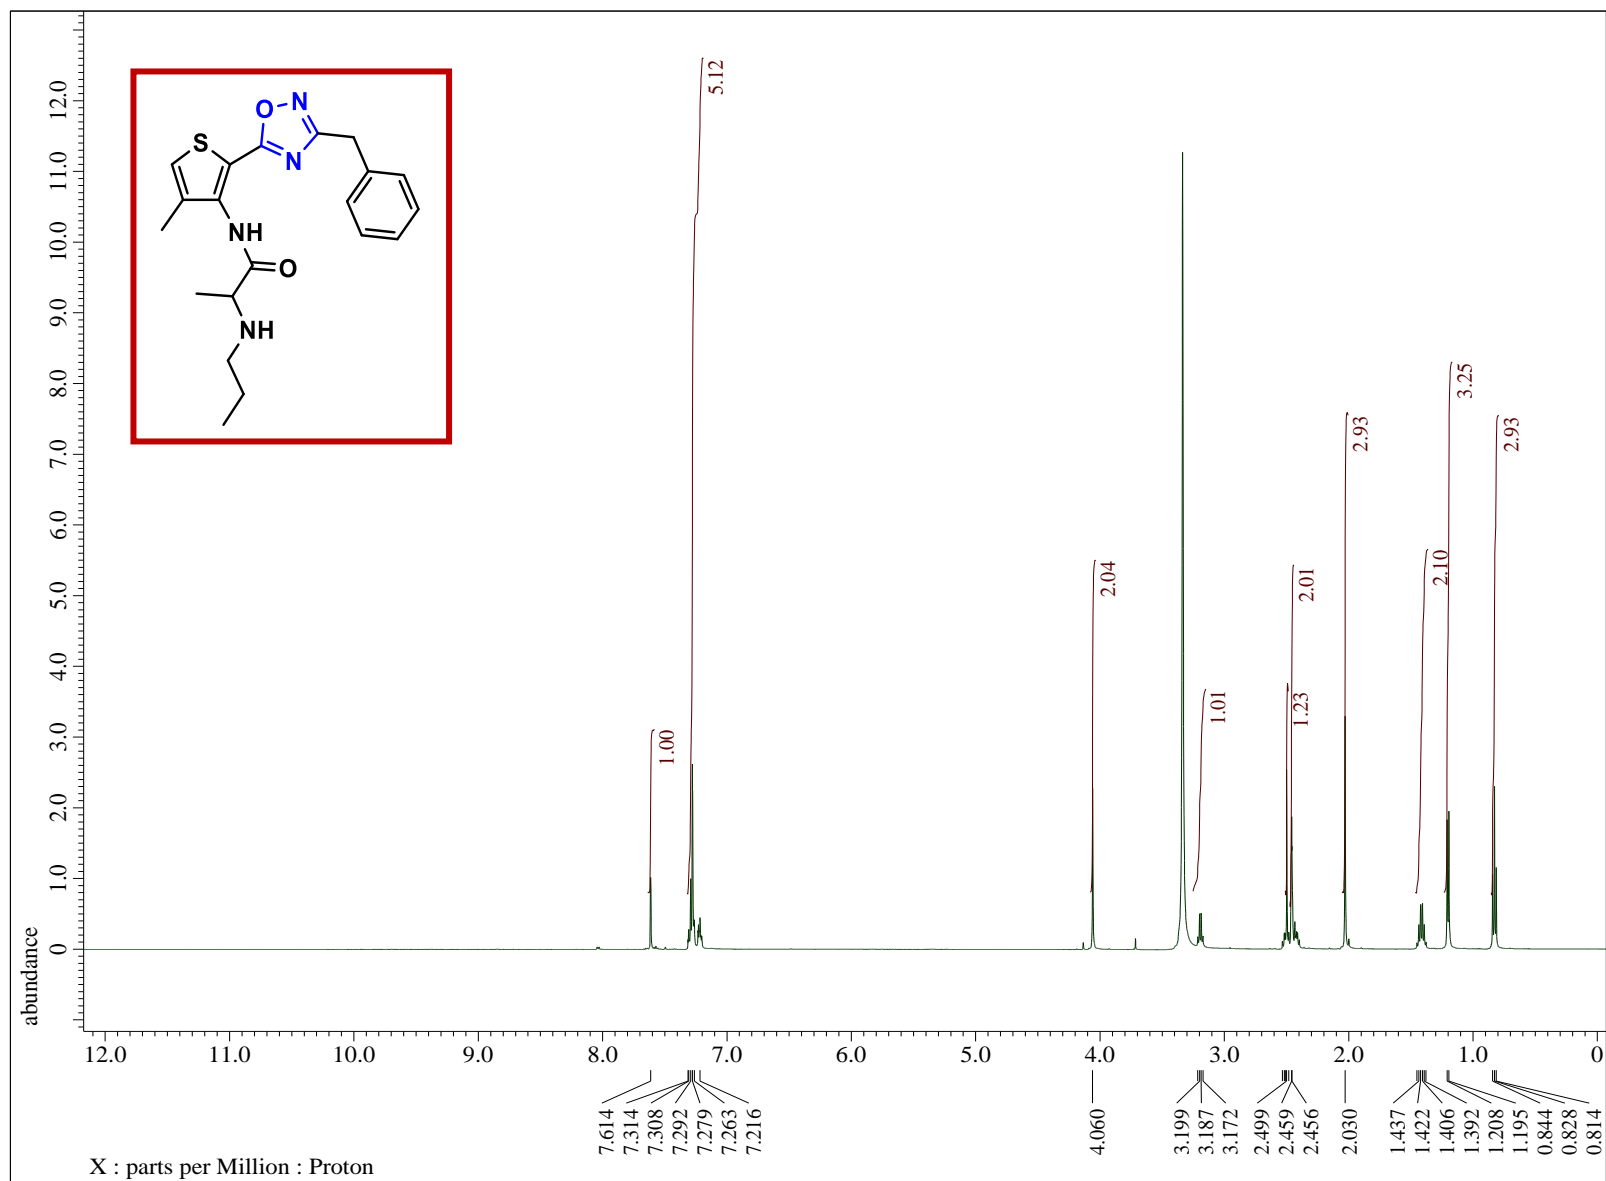

**Figure 3.**  $^1\text{H}$  NMR of **2b** (DMSO- $d_6$ )

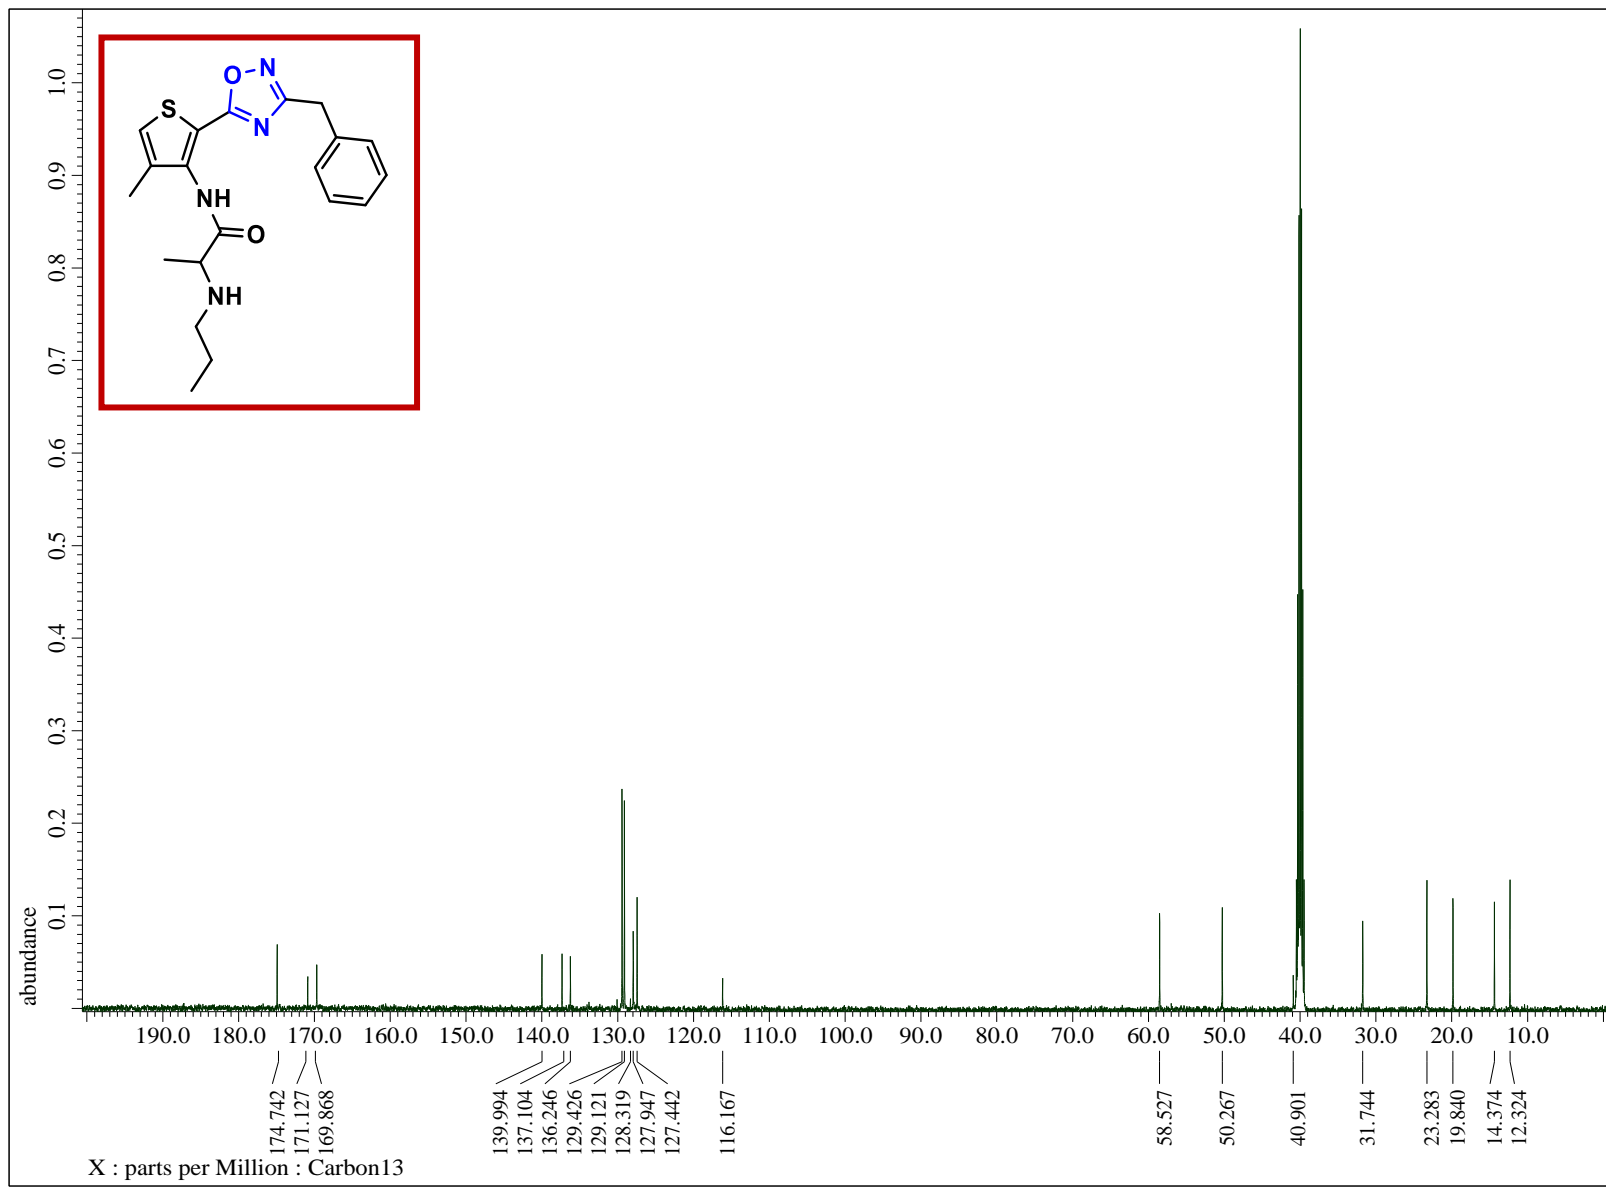

Figure 4.  $^{13}\text{C}$  NMR of 2b (DMSO- $d_6$ )

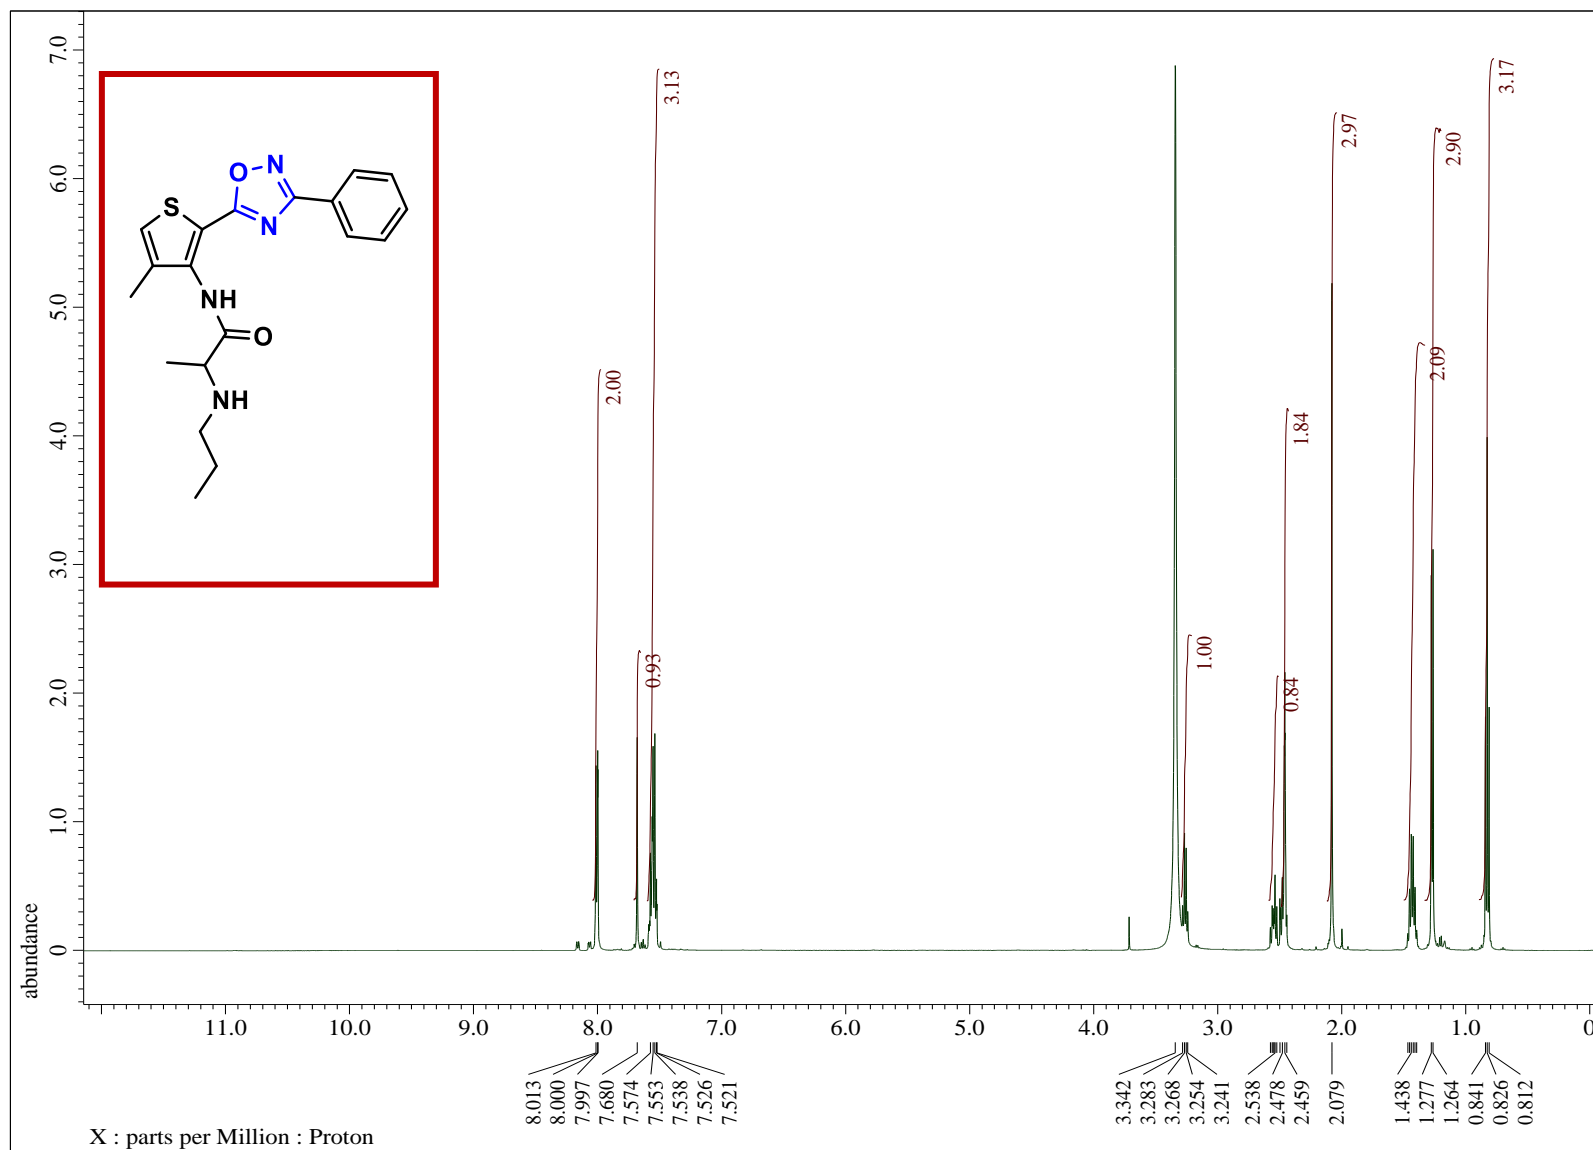

Figure 5.  $^1\text{H}$  NMR of **2c** (DMSO- $d_6$ )

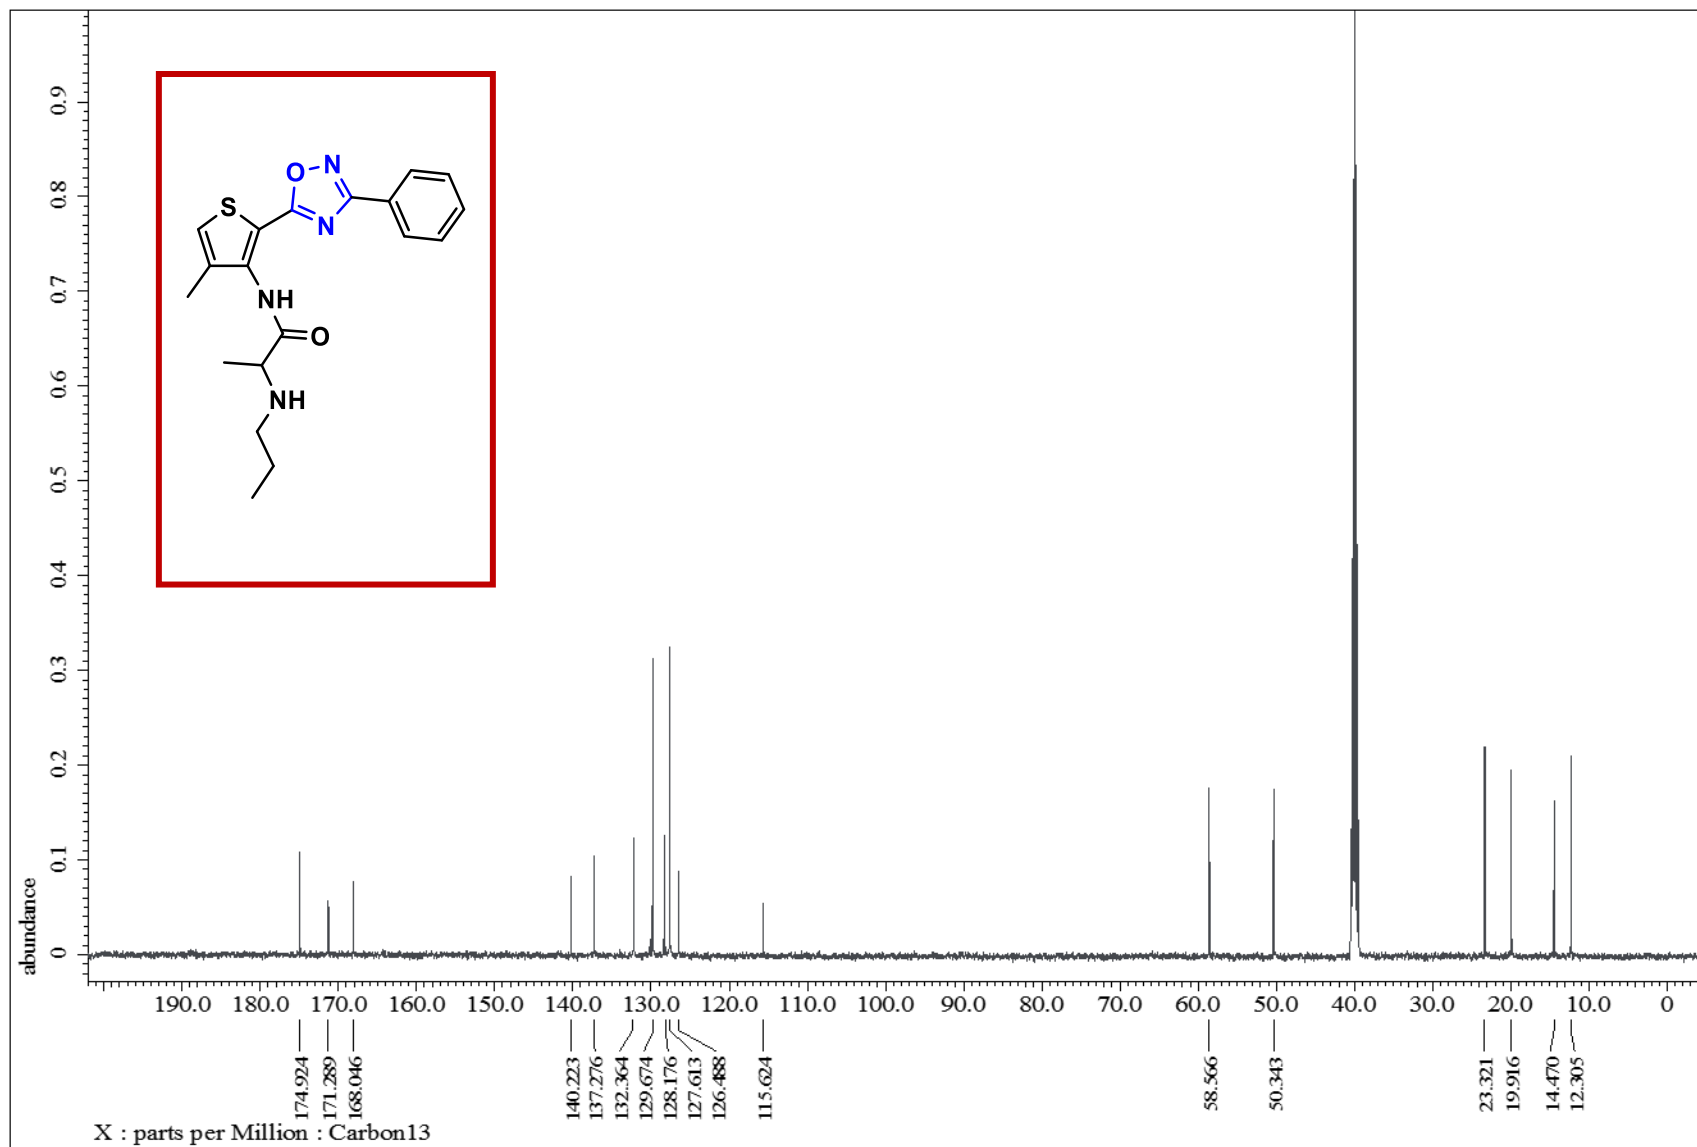

Figure 6.  $^{13}\text{C}$  NMR of **2c** (DMSO- $d_6$ )



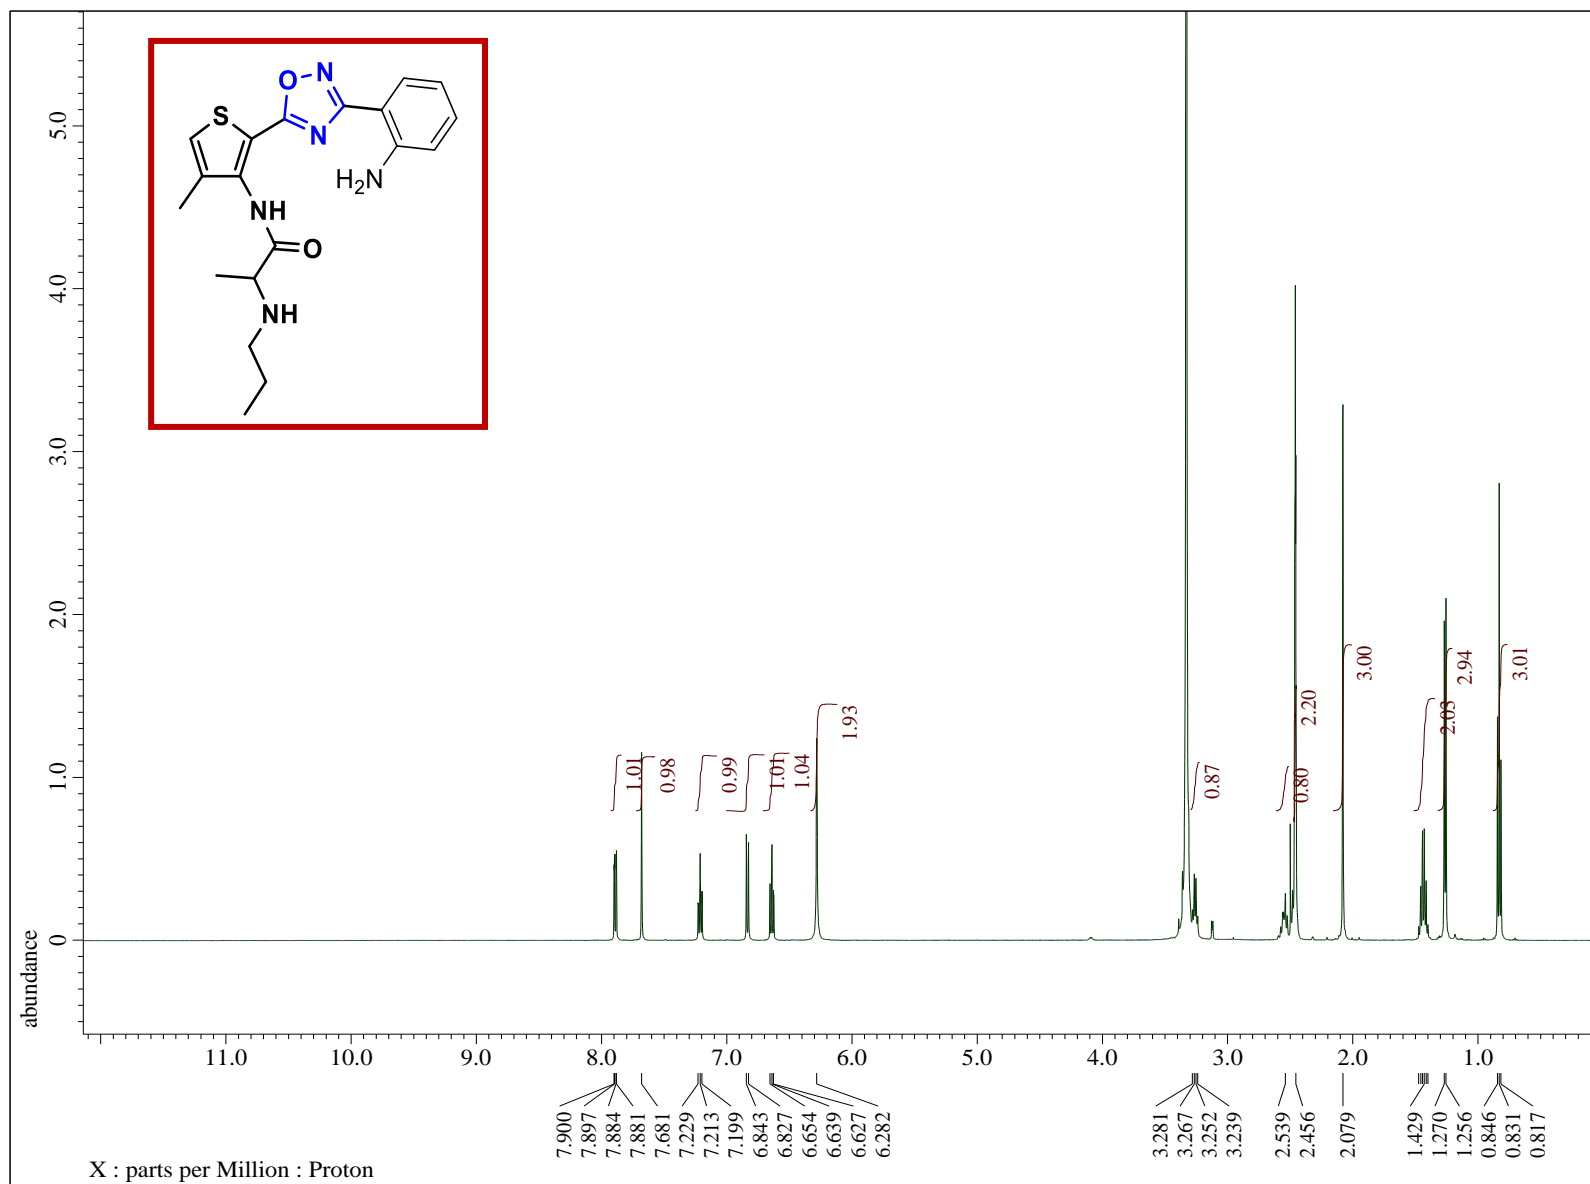

**Figure 7.** <sup>1</sup>H NMR of 2d (DMSO-d<sub>6</sub>)

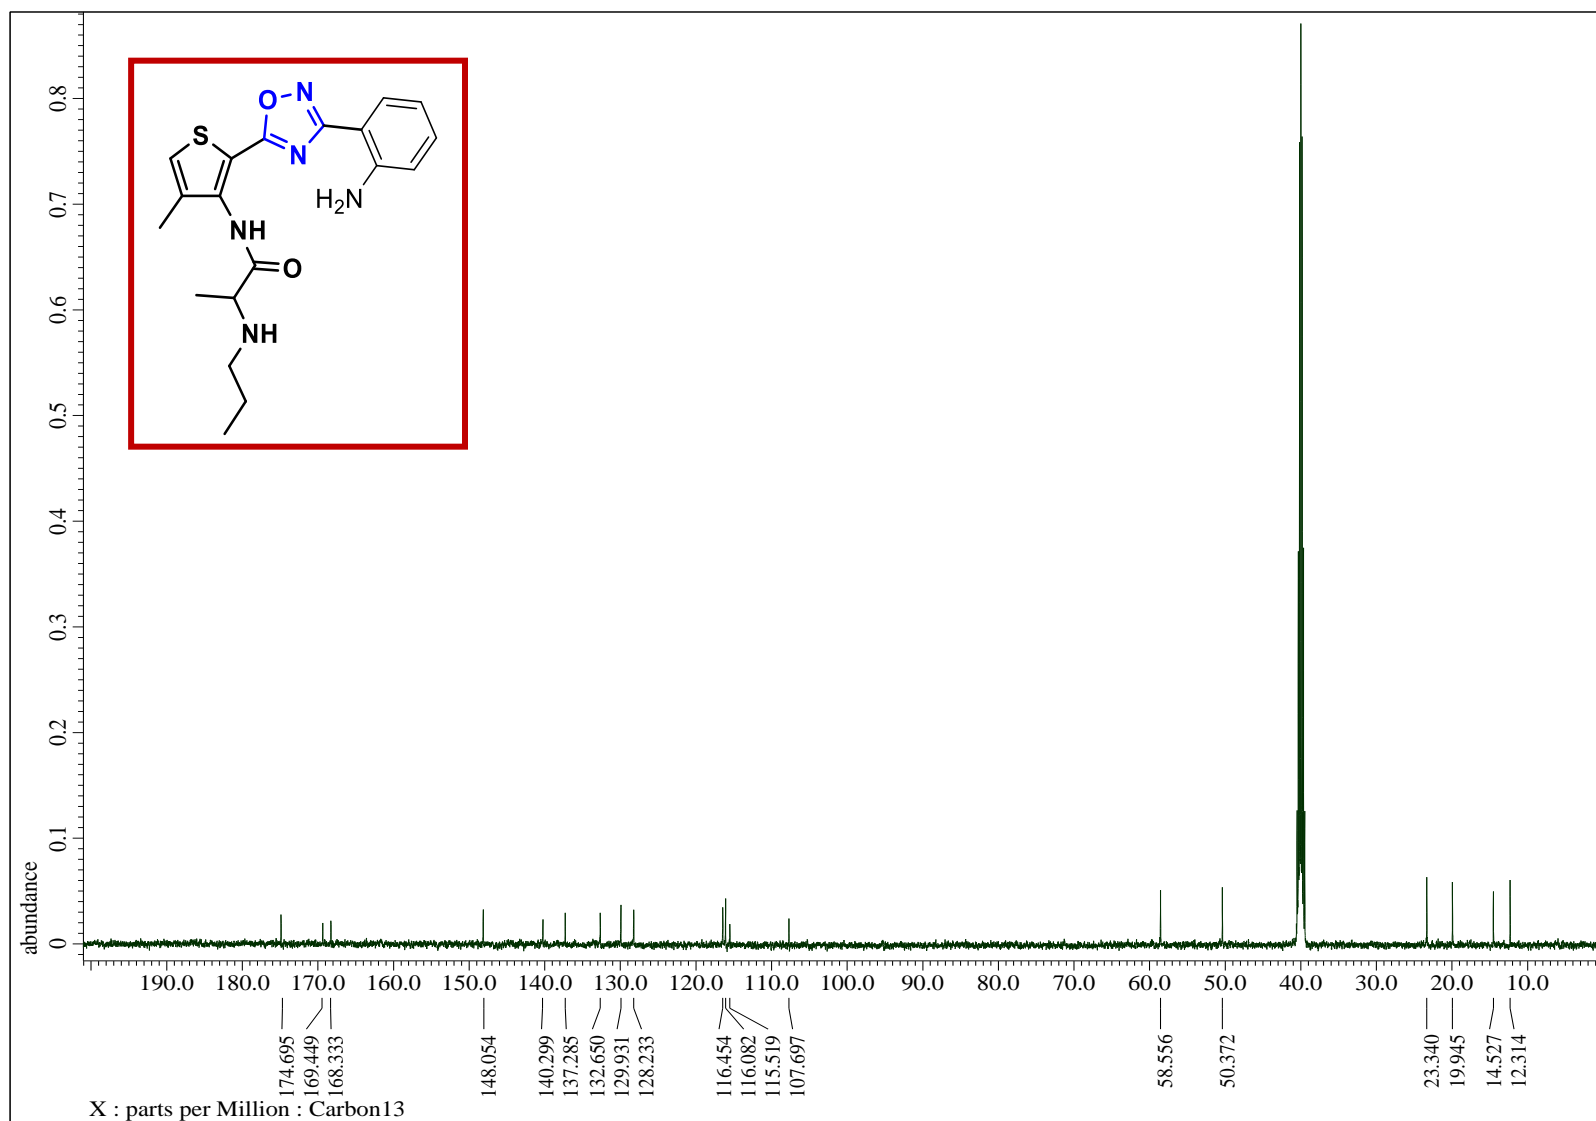

**Figure 8.**  $^{13}\text{C}$  NMR of **2d** ( $\text{DMSO-d}_6$ )

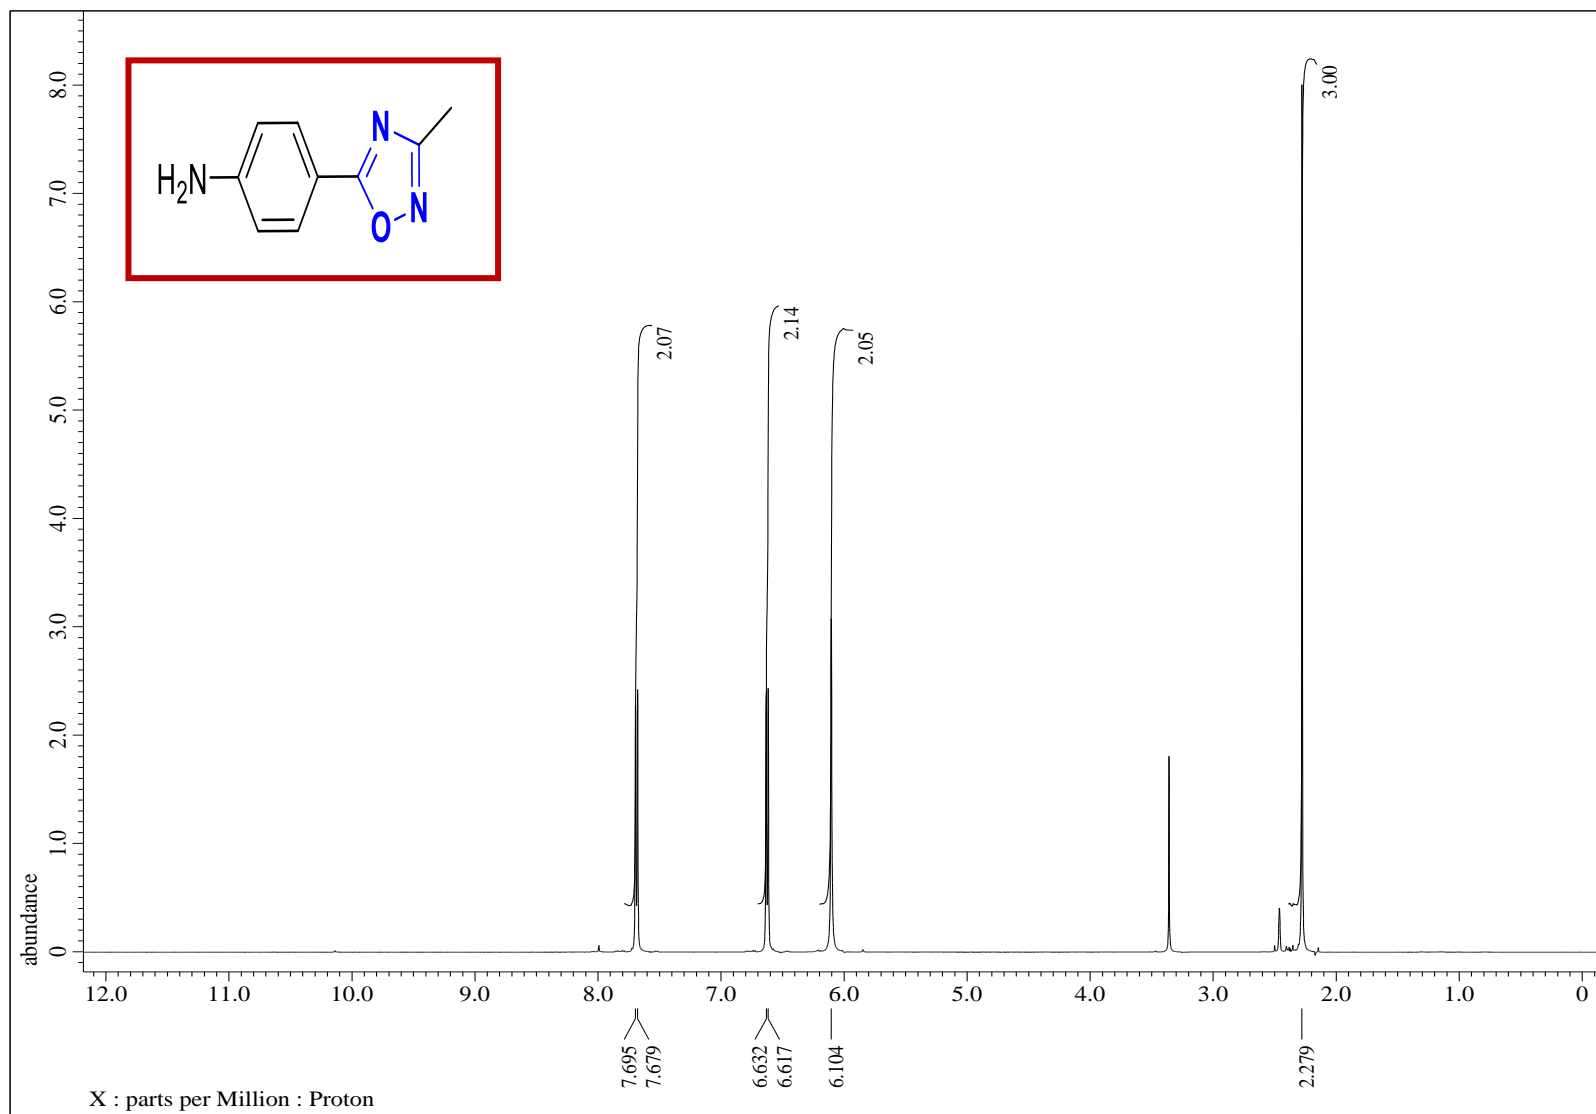

**Figure 9.** <sup>1</sup>H NMR of 3b (DMSO-d<sub>6</sub>)

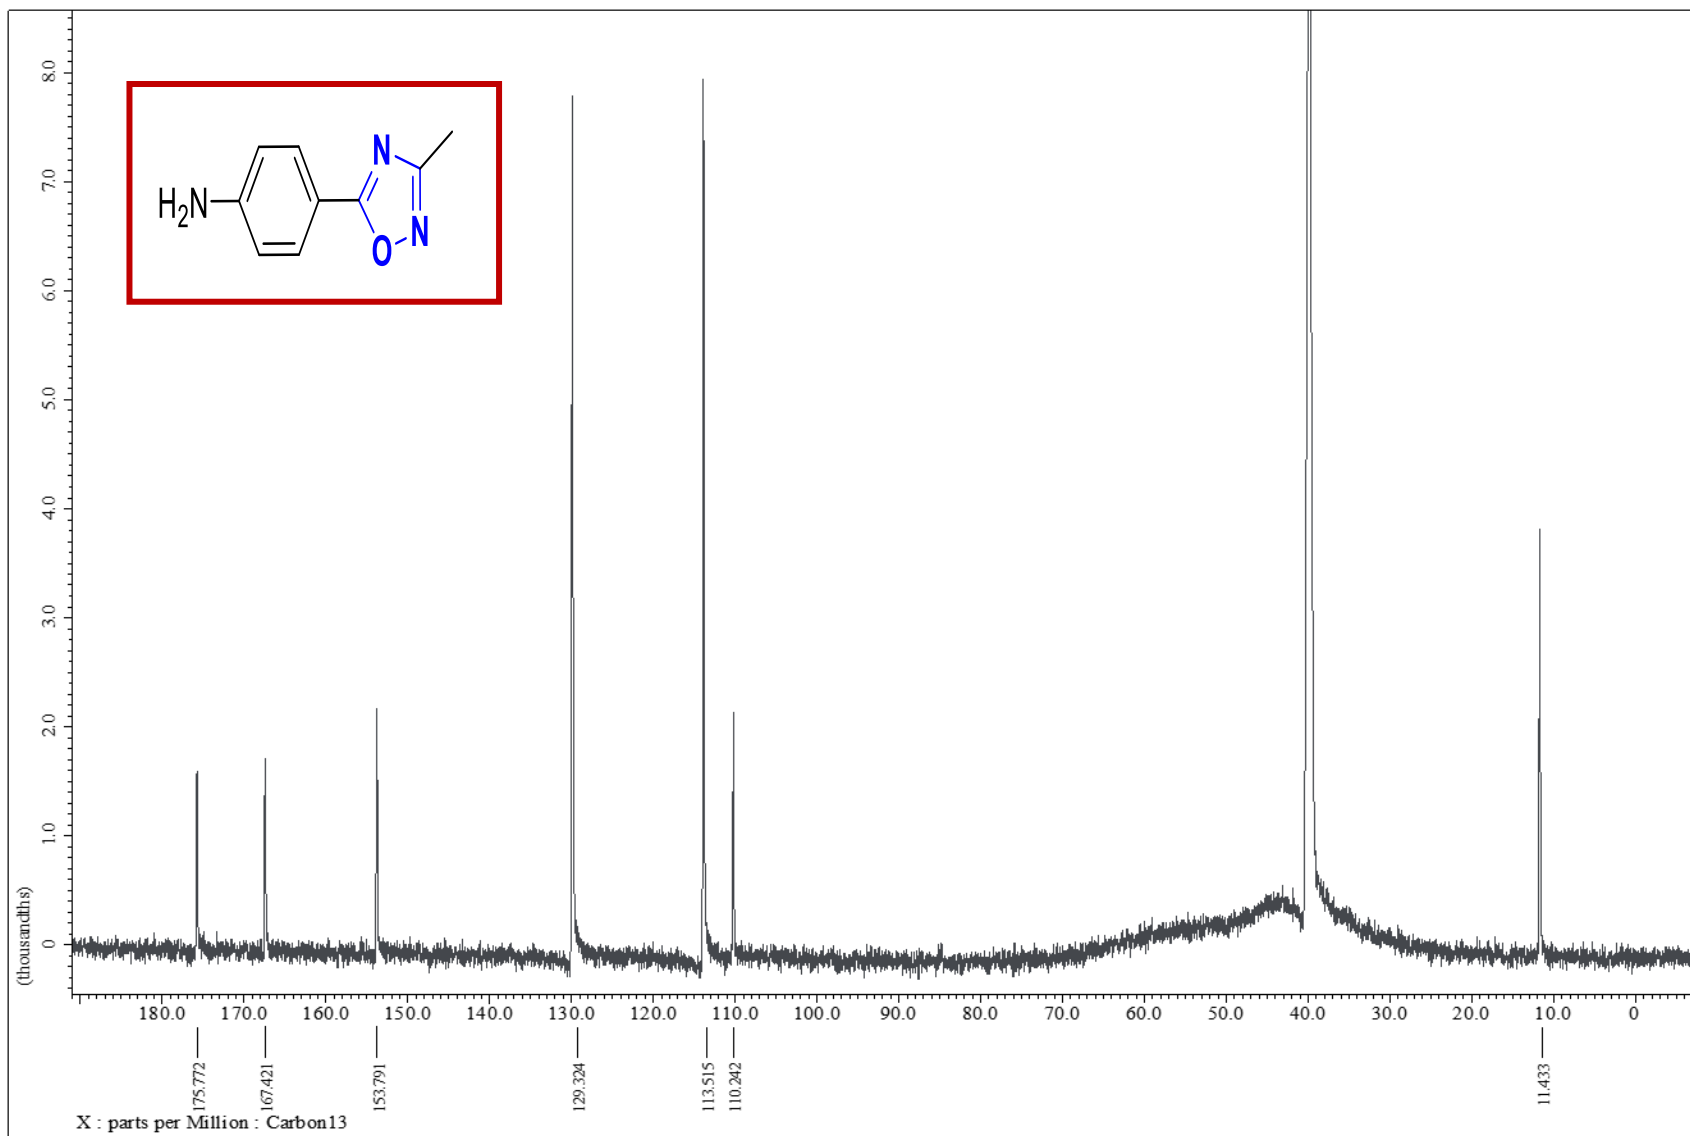

**Figure 10.**  $^{13}\text{C}$  NMR of **3b** ( $\text{DMSO-d}_6$ )

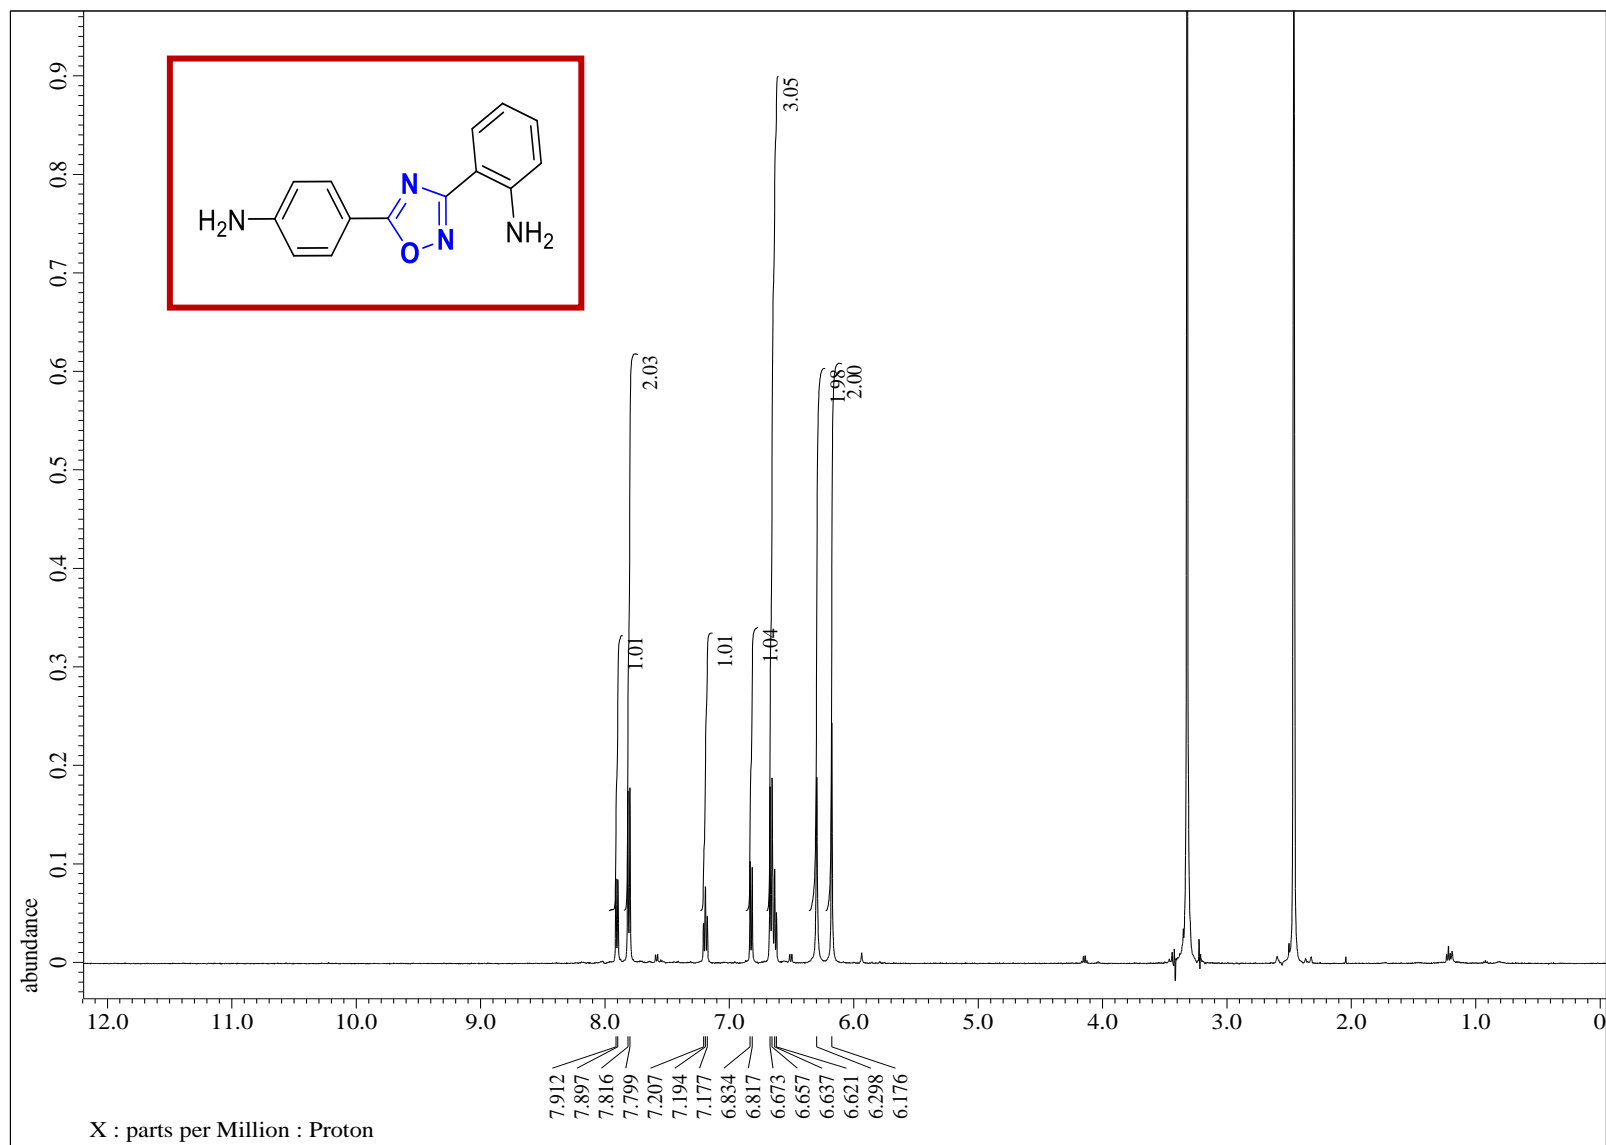

Figure 11. <sup>1</sup>H NMR of 3d (DMSO-d<sub>6</sub>)

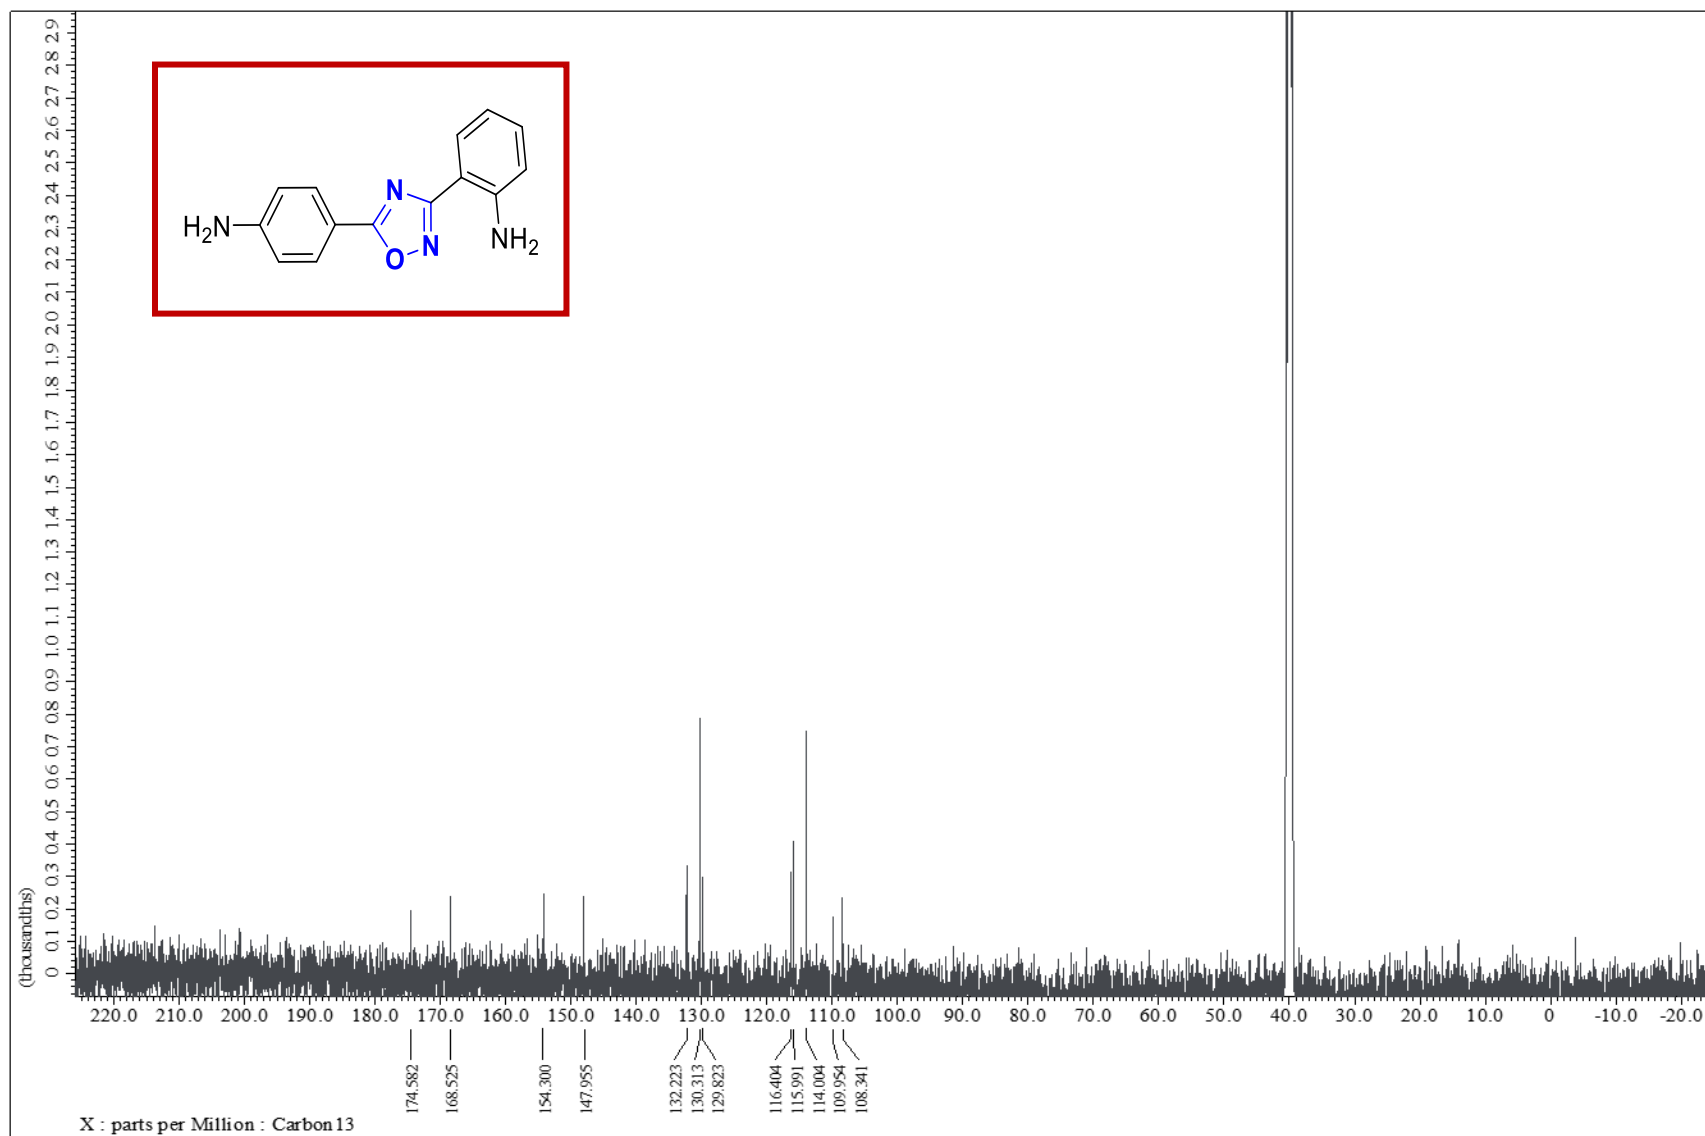

Figure 12.  $^{13}\text{C}$  NMR of **3b** ( $\text{DMSO-d}_6$ )

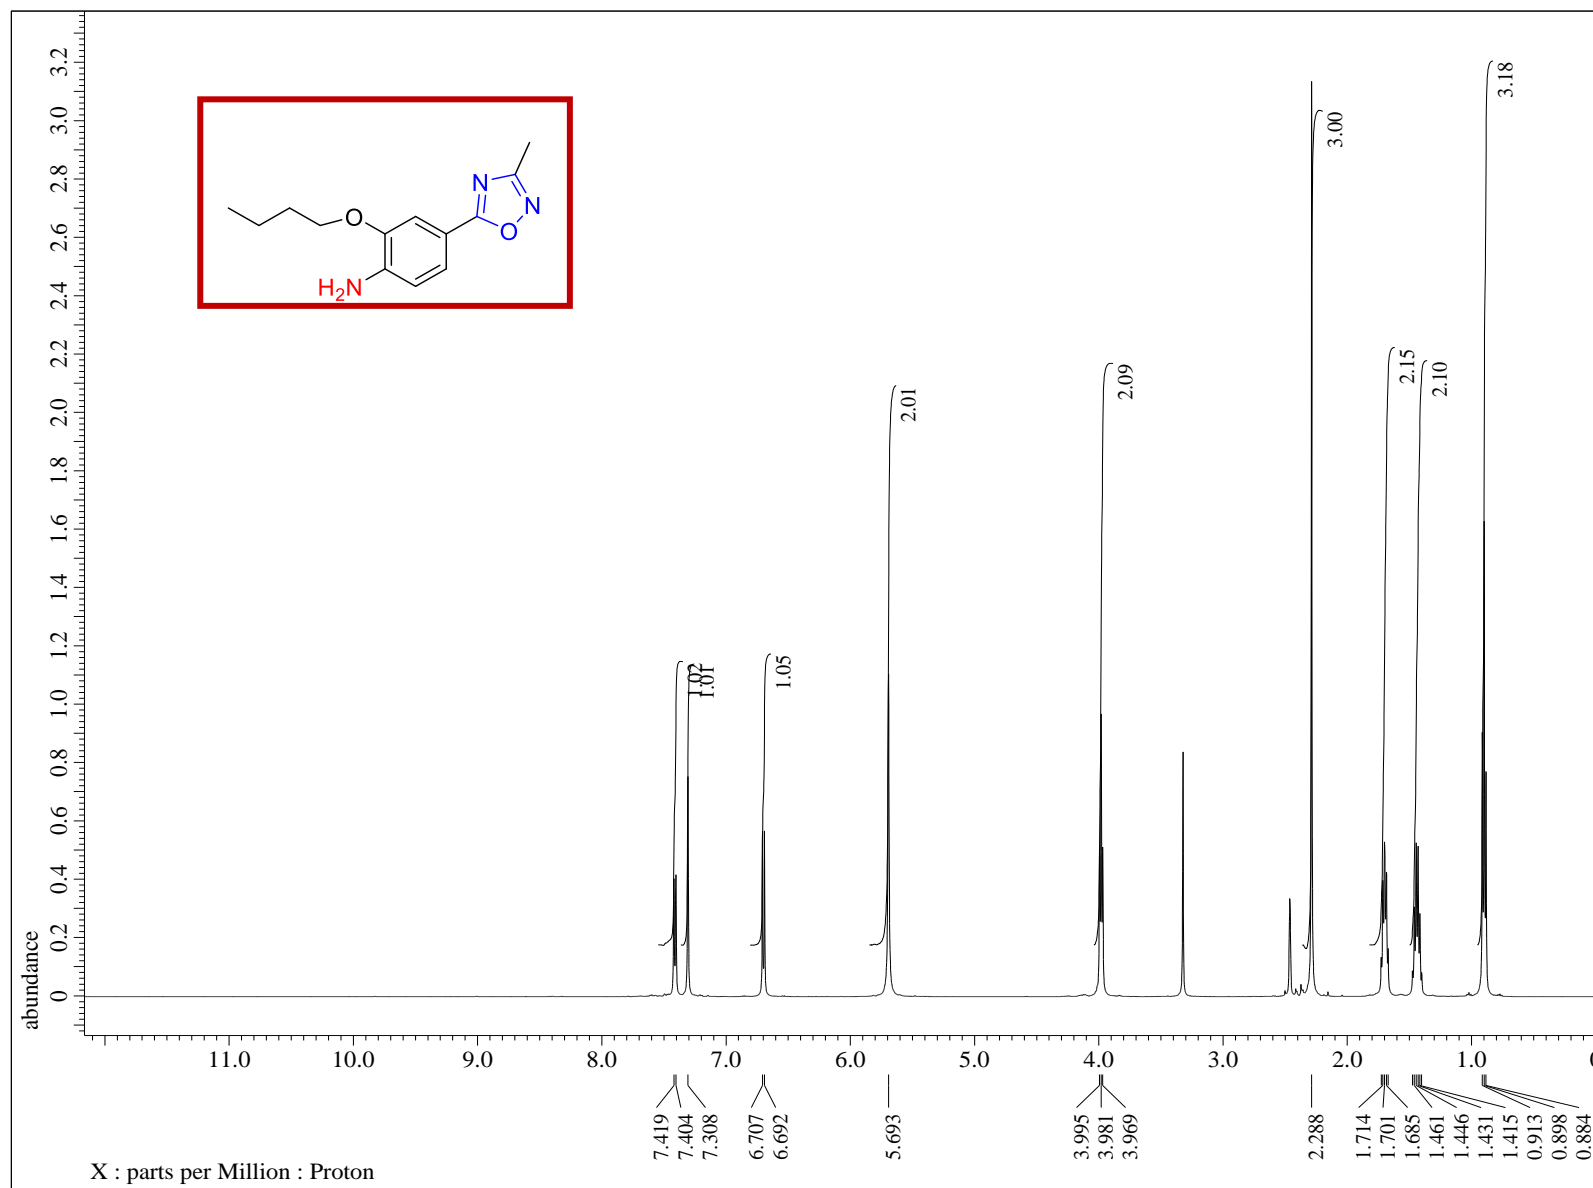

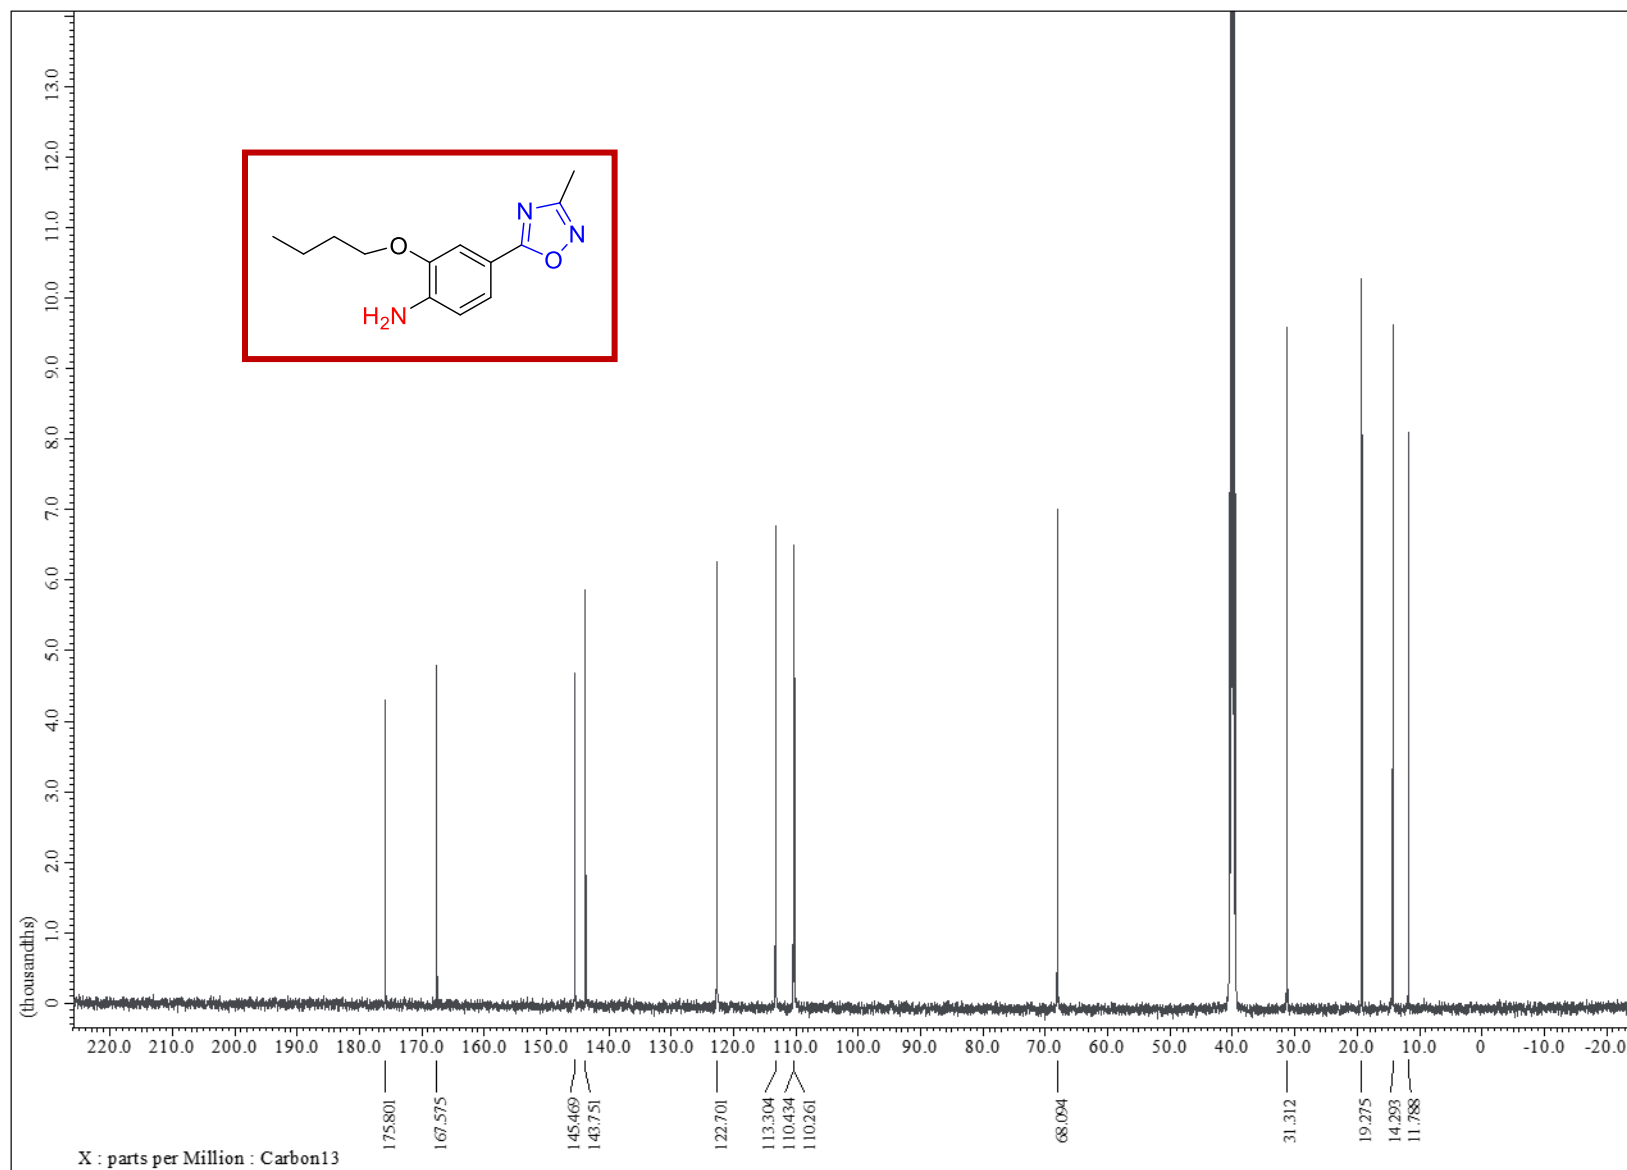

Figure 14  $^{13}\text{C}$  NMR of 4a (DMSO-d6)



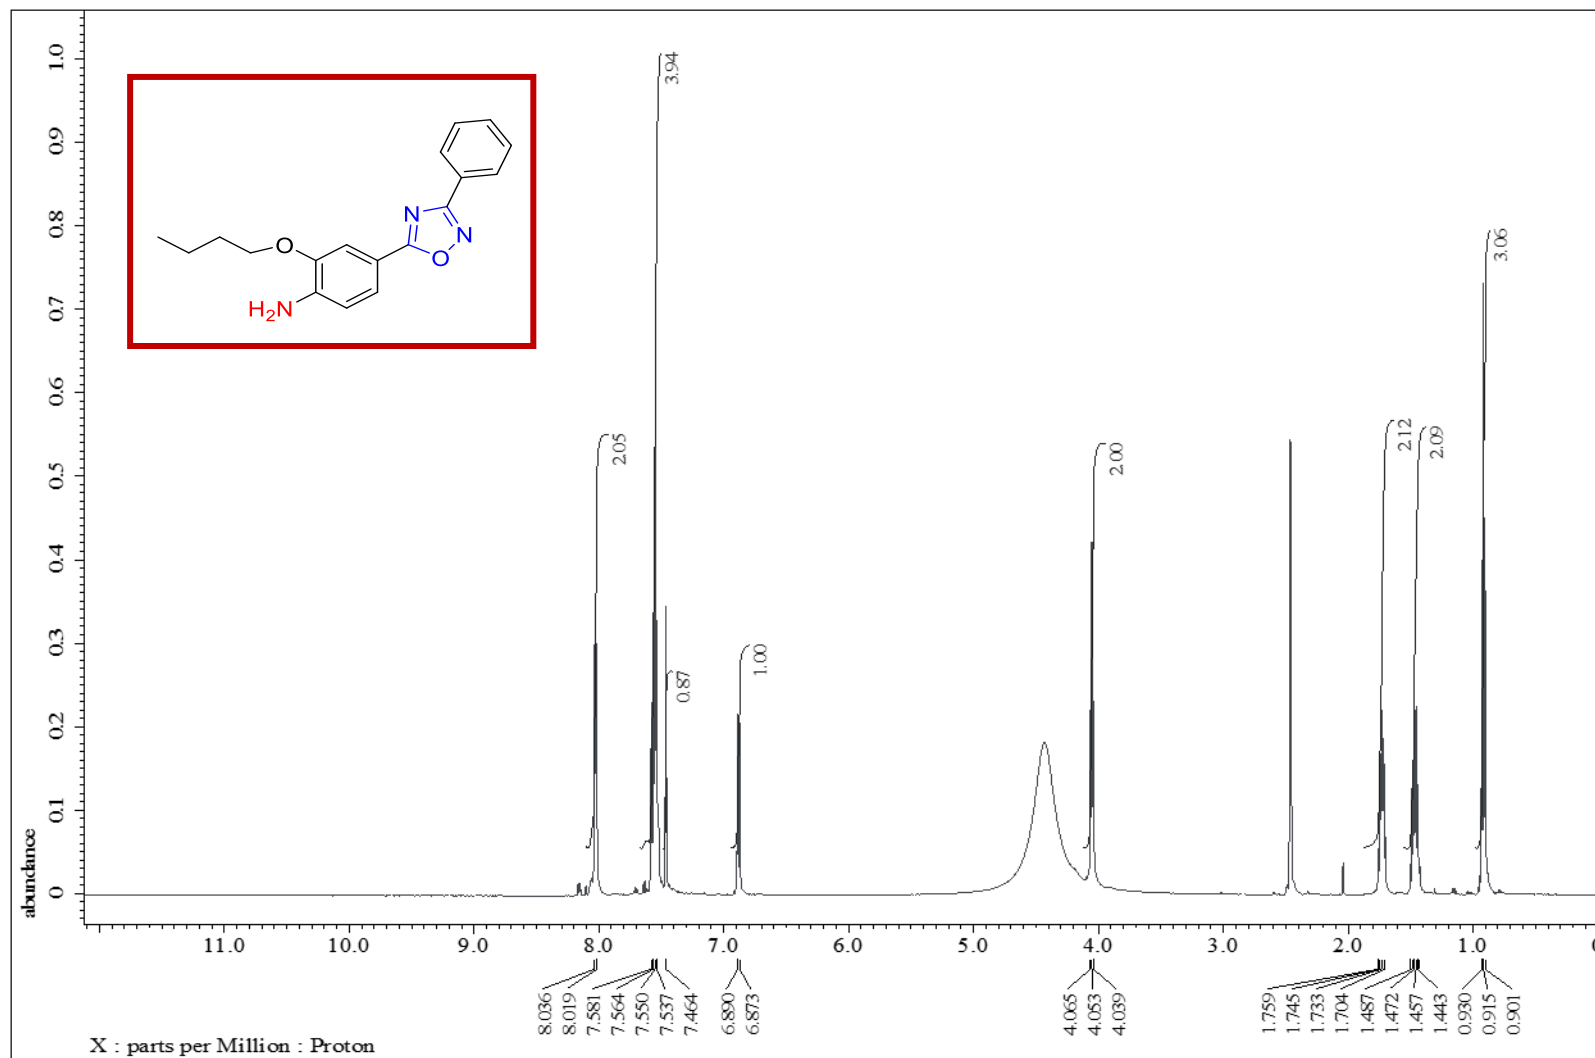

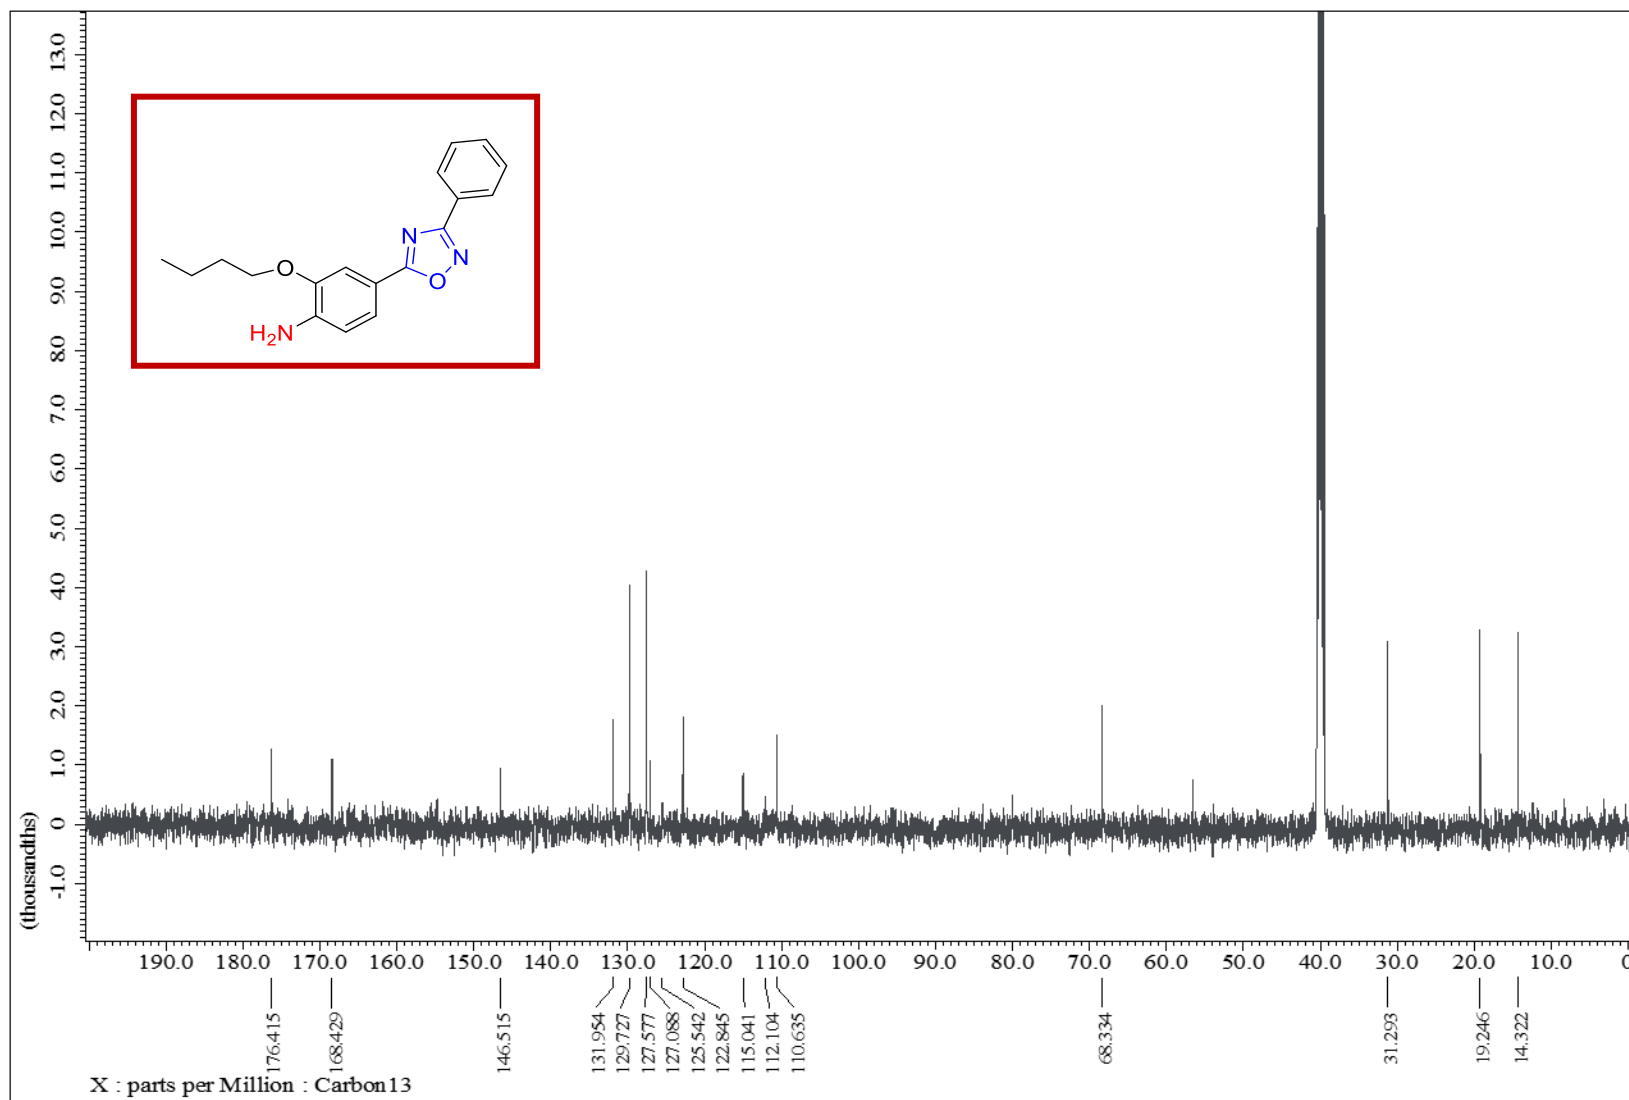

Figure 16.  $^{13}\text{C}$  NMR of 4b (DMSO- $d_6$ )

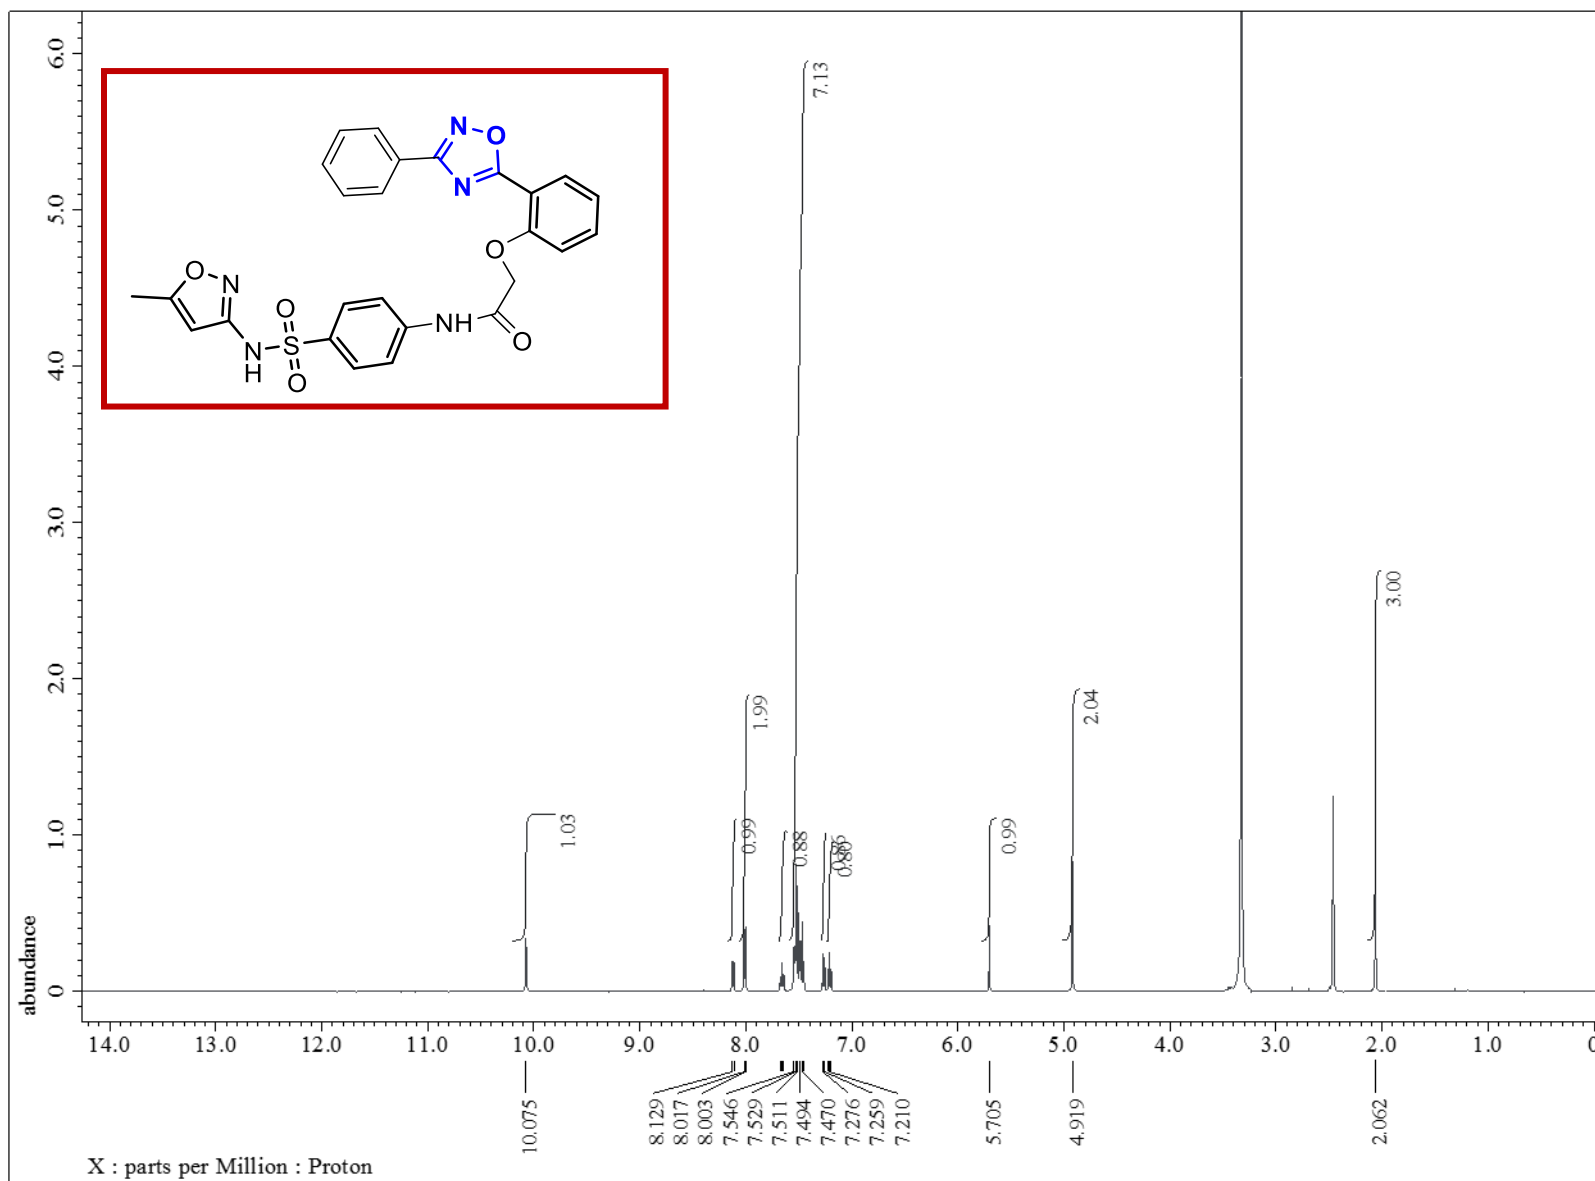

Figure 17. <sup>1</sup>H NMR of 6 (DMSO-d<sub>6</sub>)

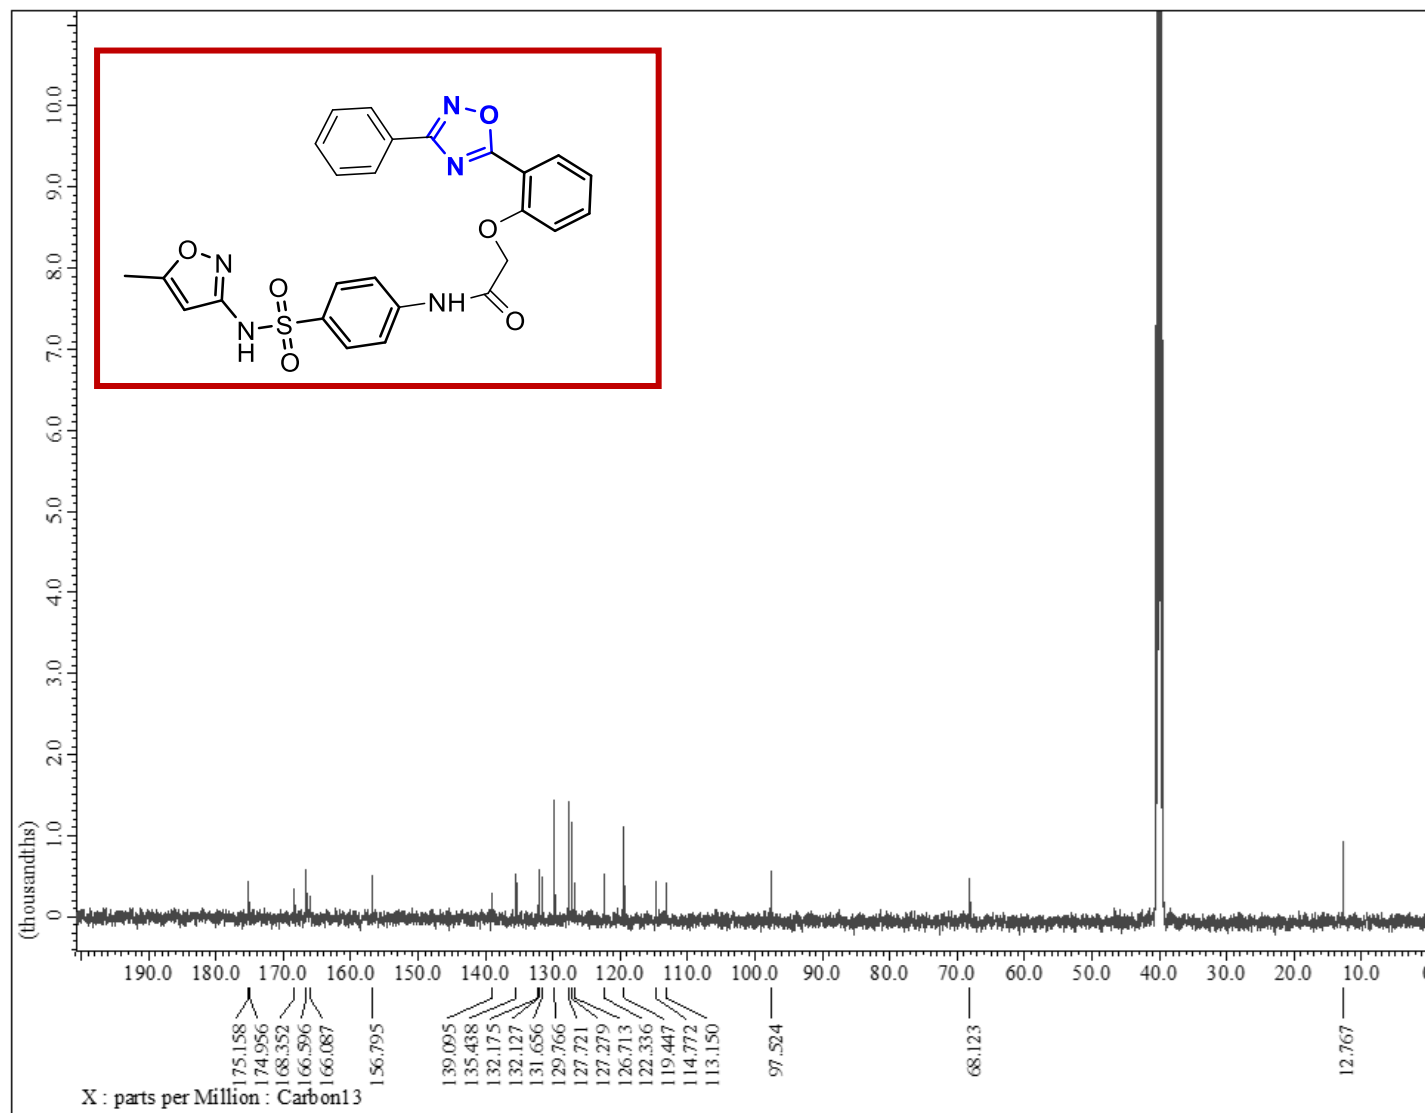

Figure 18.  $^{13}\text{C}$  NMR of 6 (DMSO- $d_6$ )

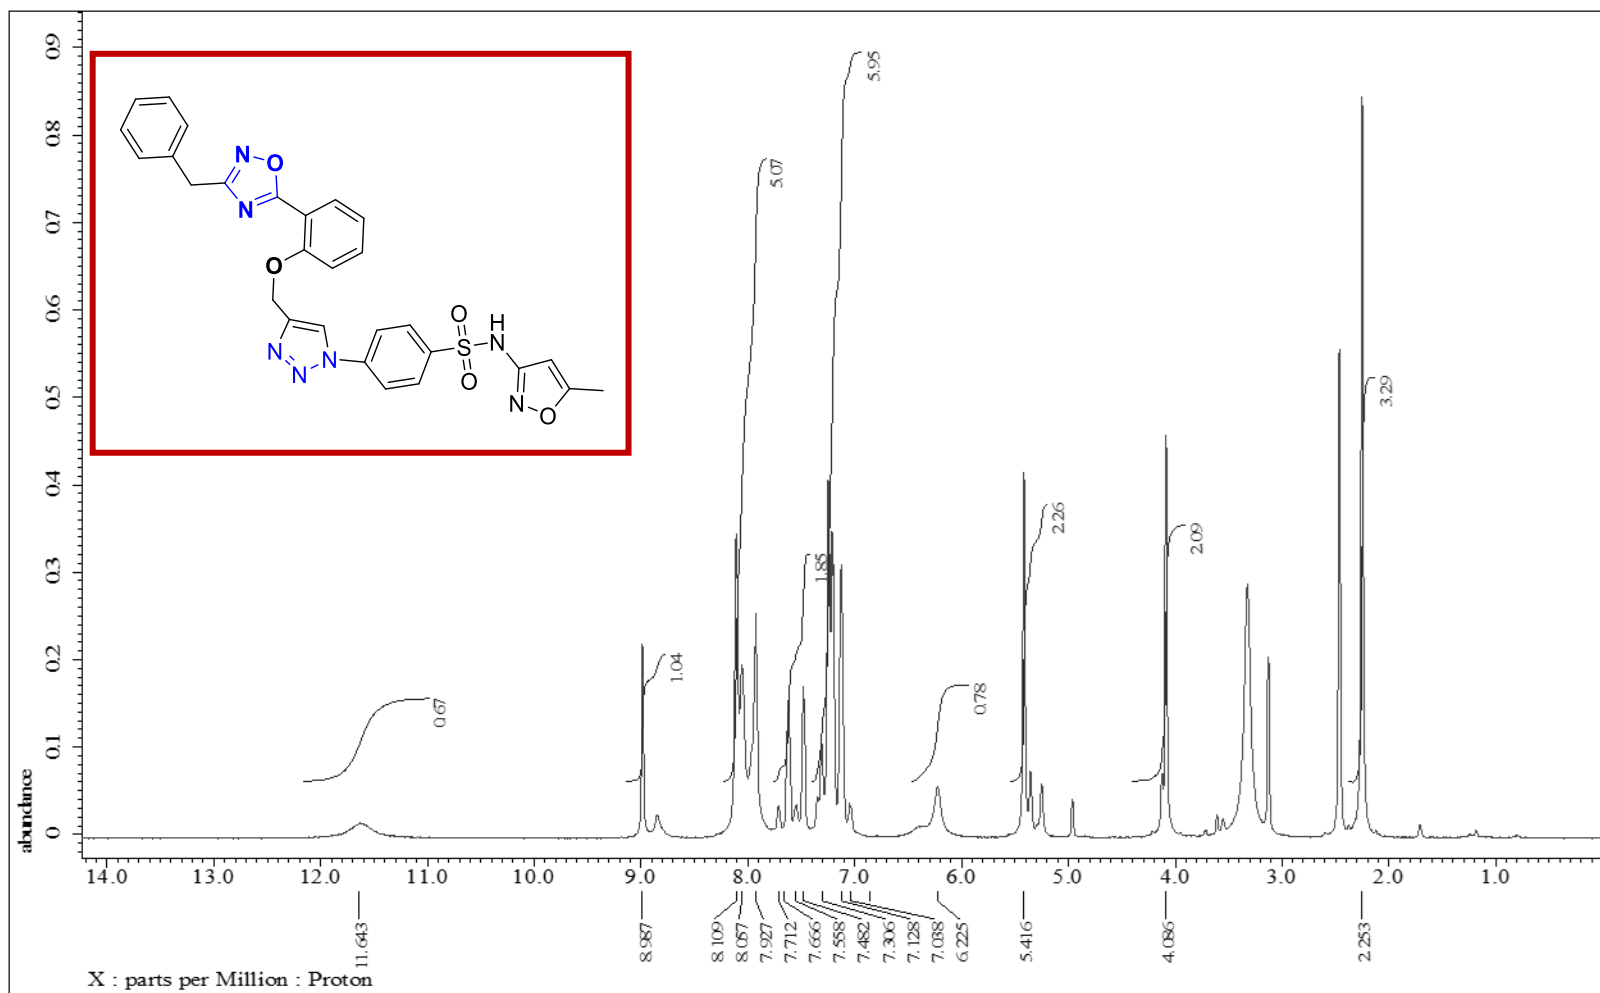

Figure 19.  $^1\text{H}$  NMR of 9a (DMSO- $d_6$ )

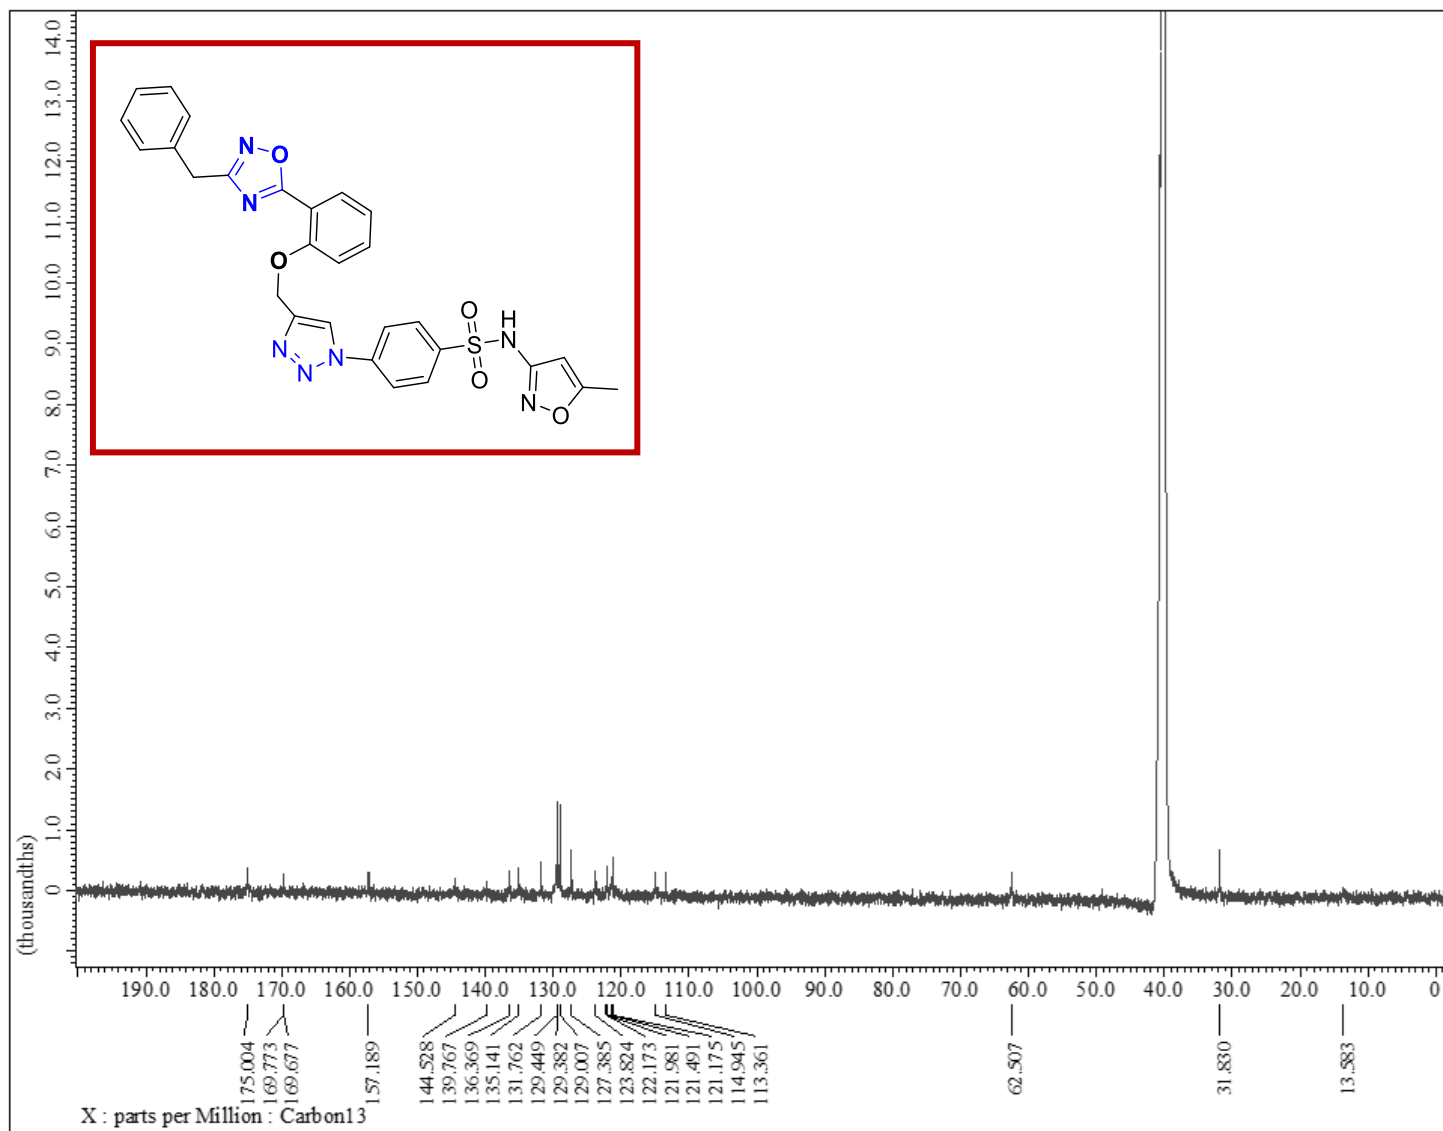

Figure 20.  $^{13}\text{C}$  NMR of 9a (DMSO- $d_6$ )

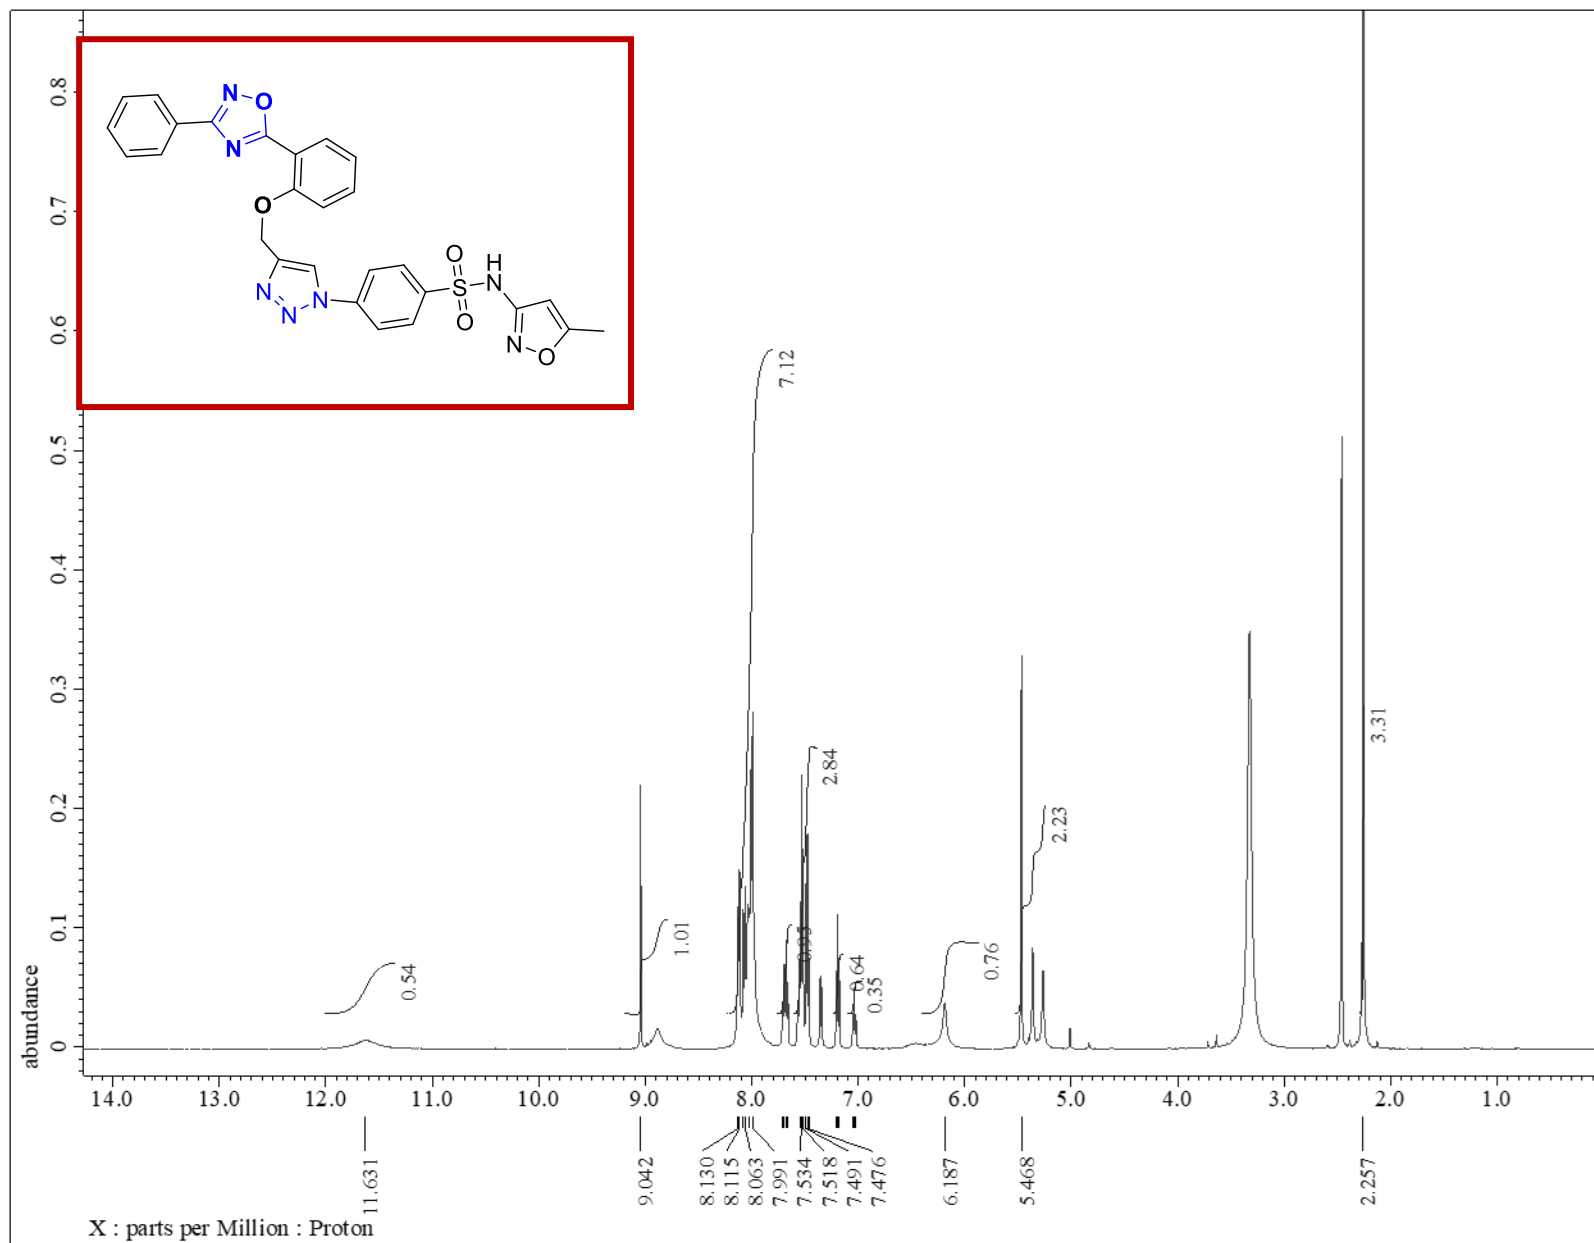

Figure 21.  $^1\text{H}$  NMR of 9b (DMSO- $d_6$ )

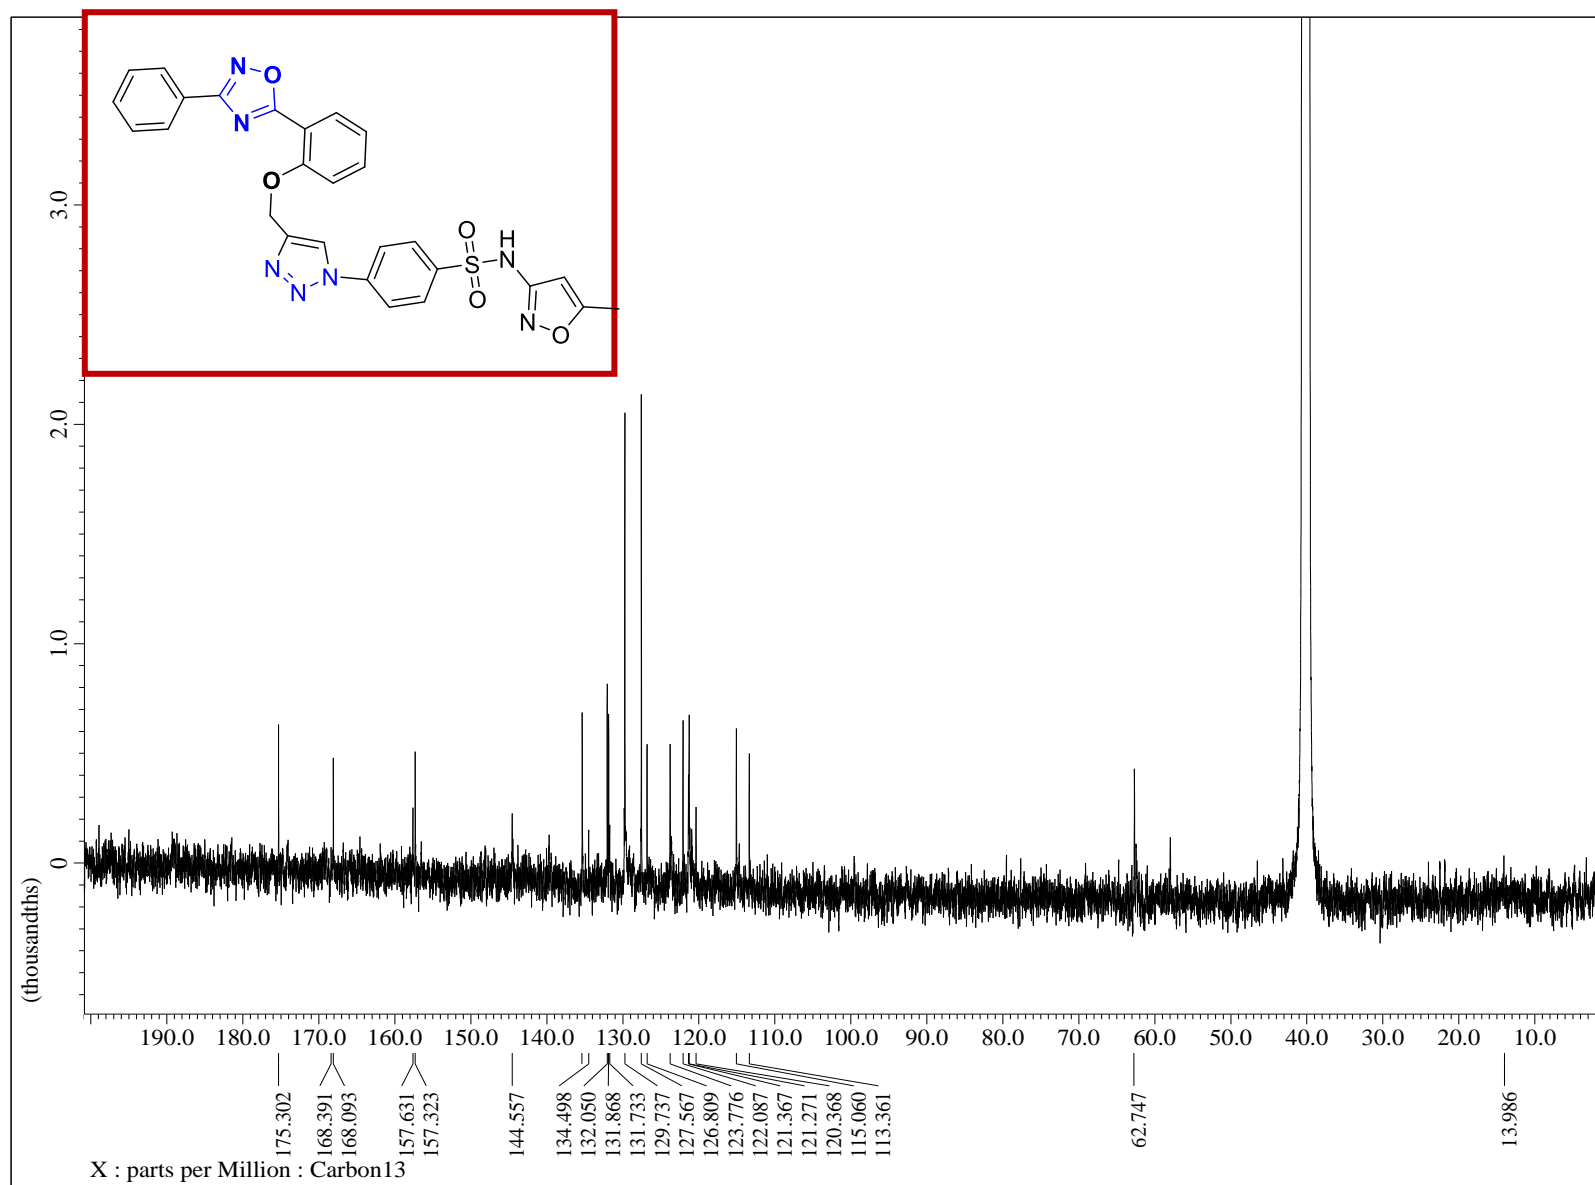

Figure 22.  $^{13}\text{C}$  NMR of **9b** (DMSO- $d_6$ )



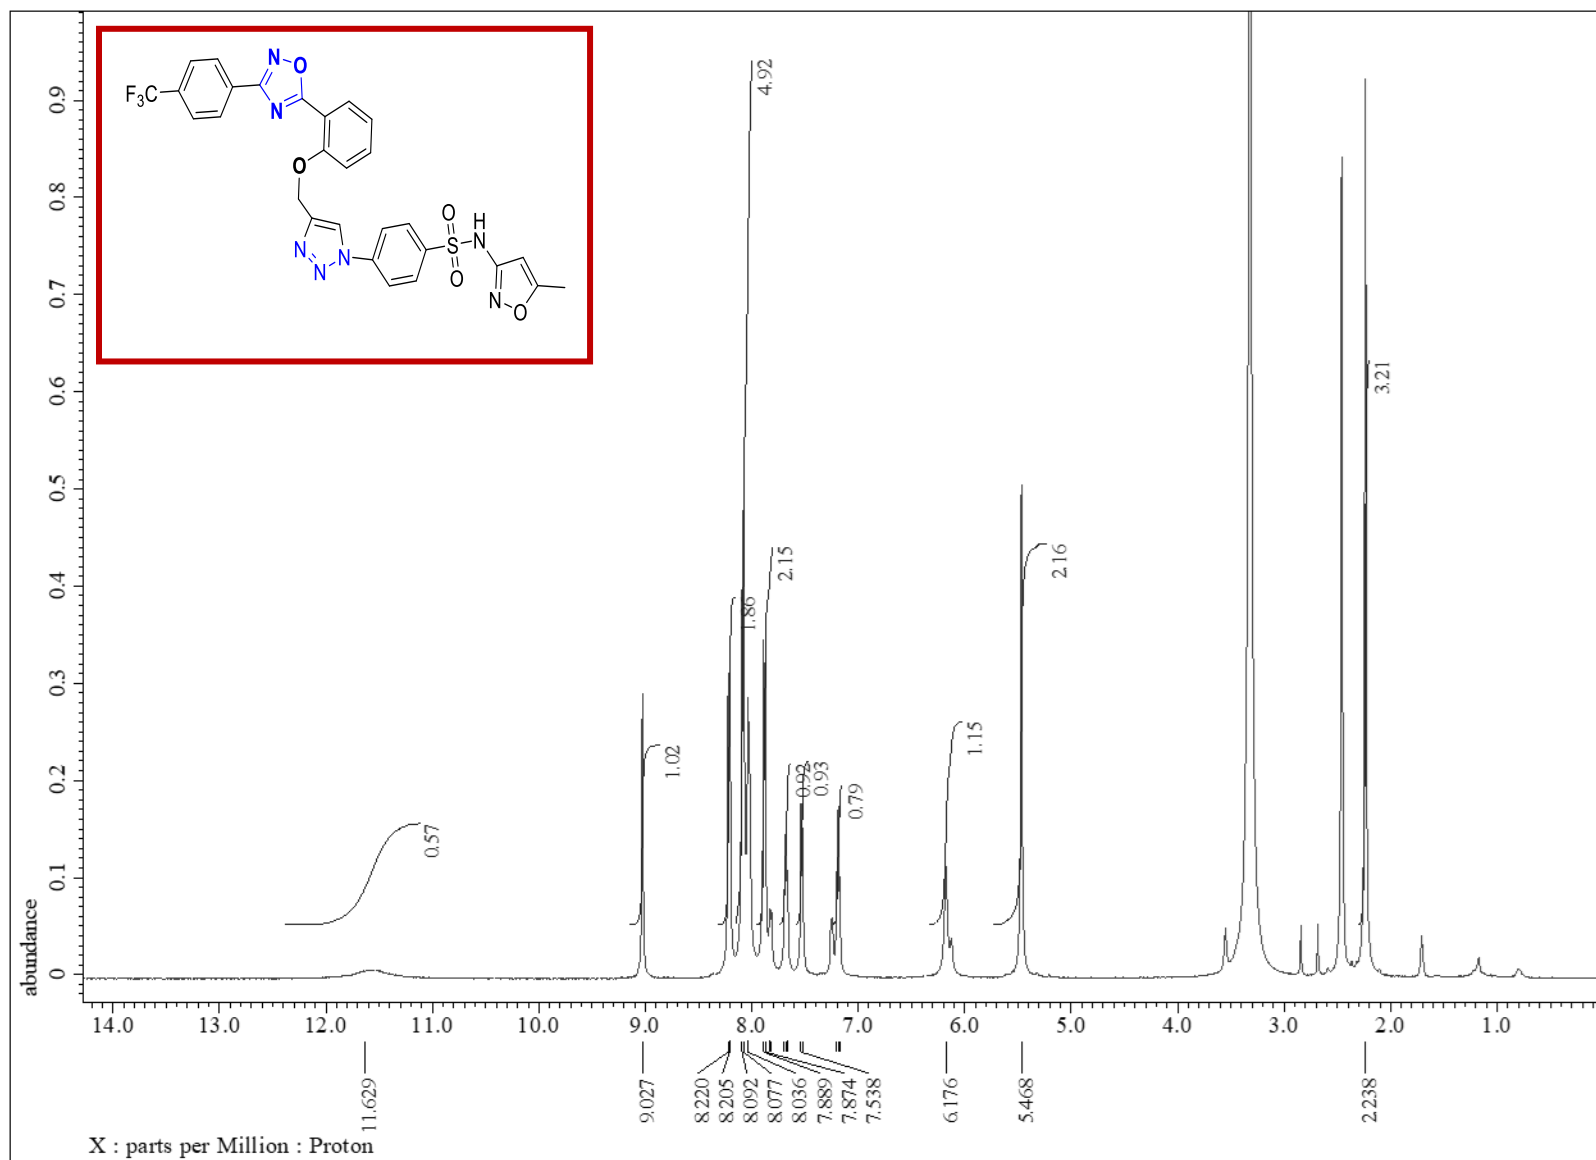

Figure 23.  $^1\text{H}$  NMR of 9c (DMSO- $d_6$ )

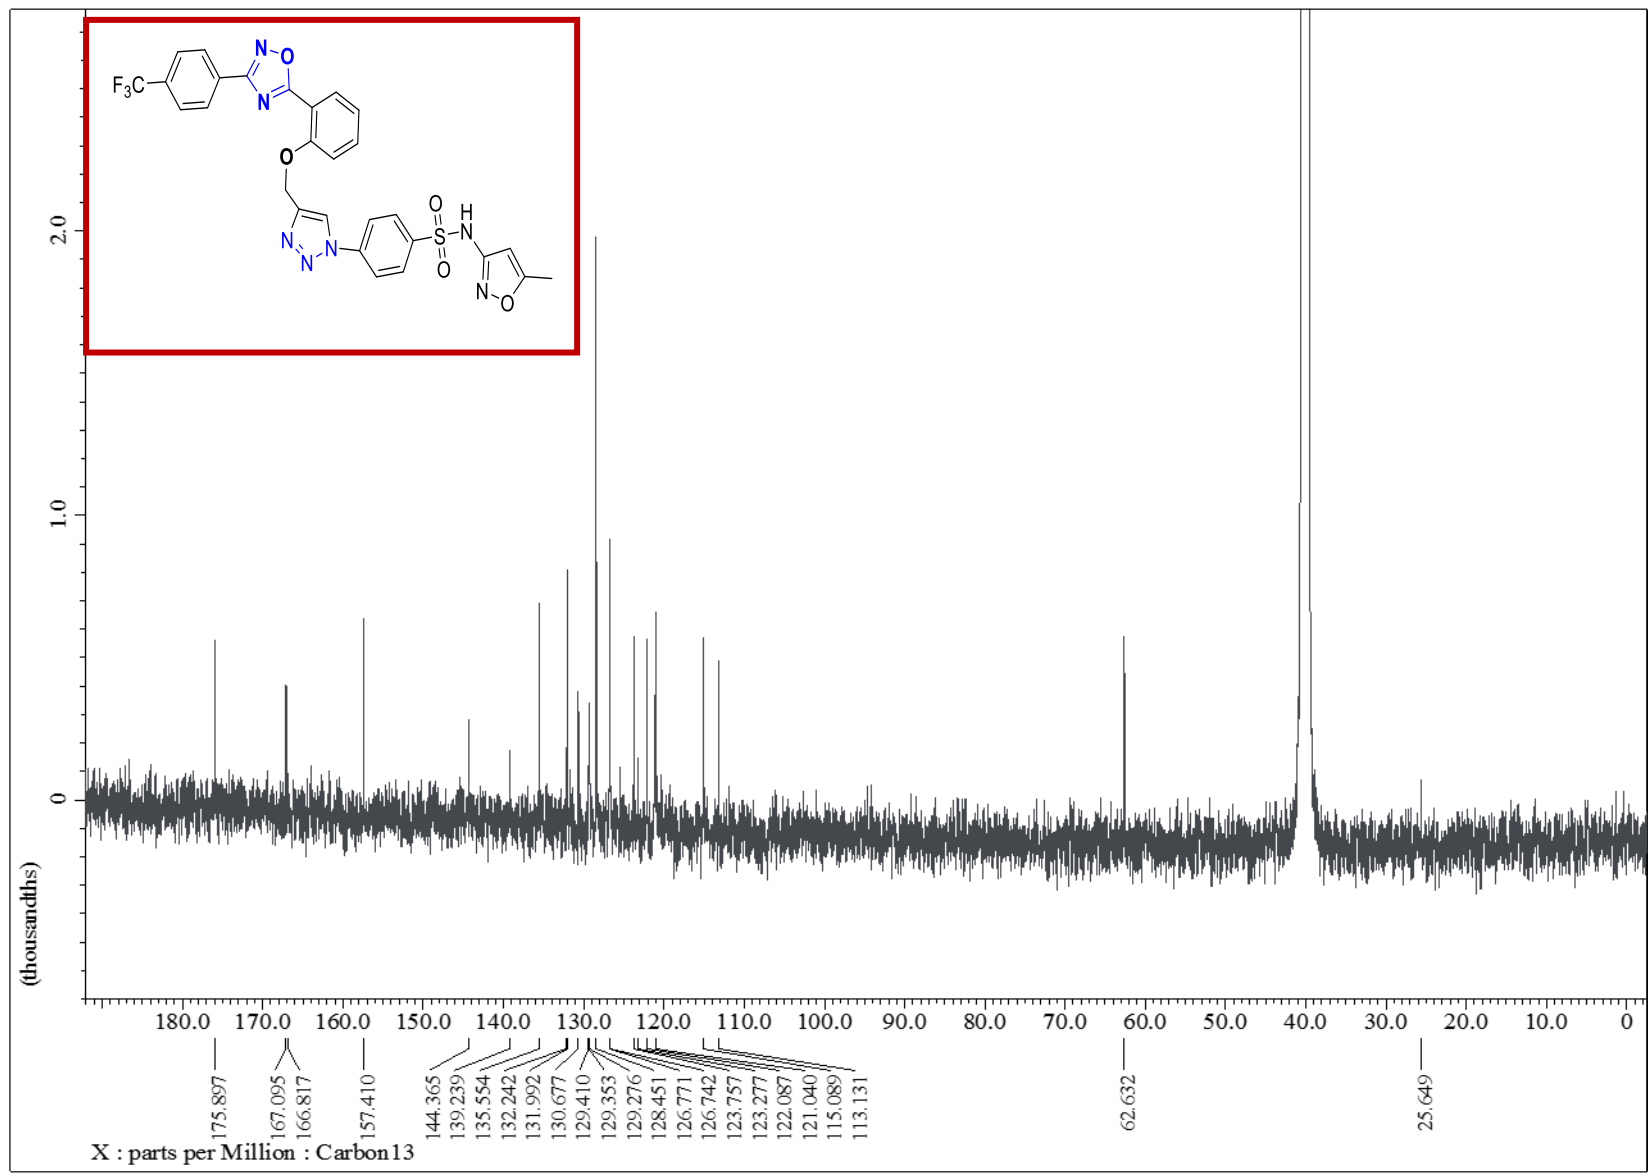

Figure 24.  $^{13}\text{C}$  NMR of 9c (DMSO- $d_6$ )

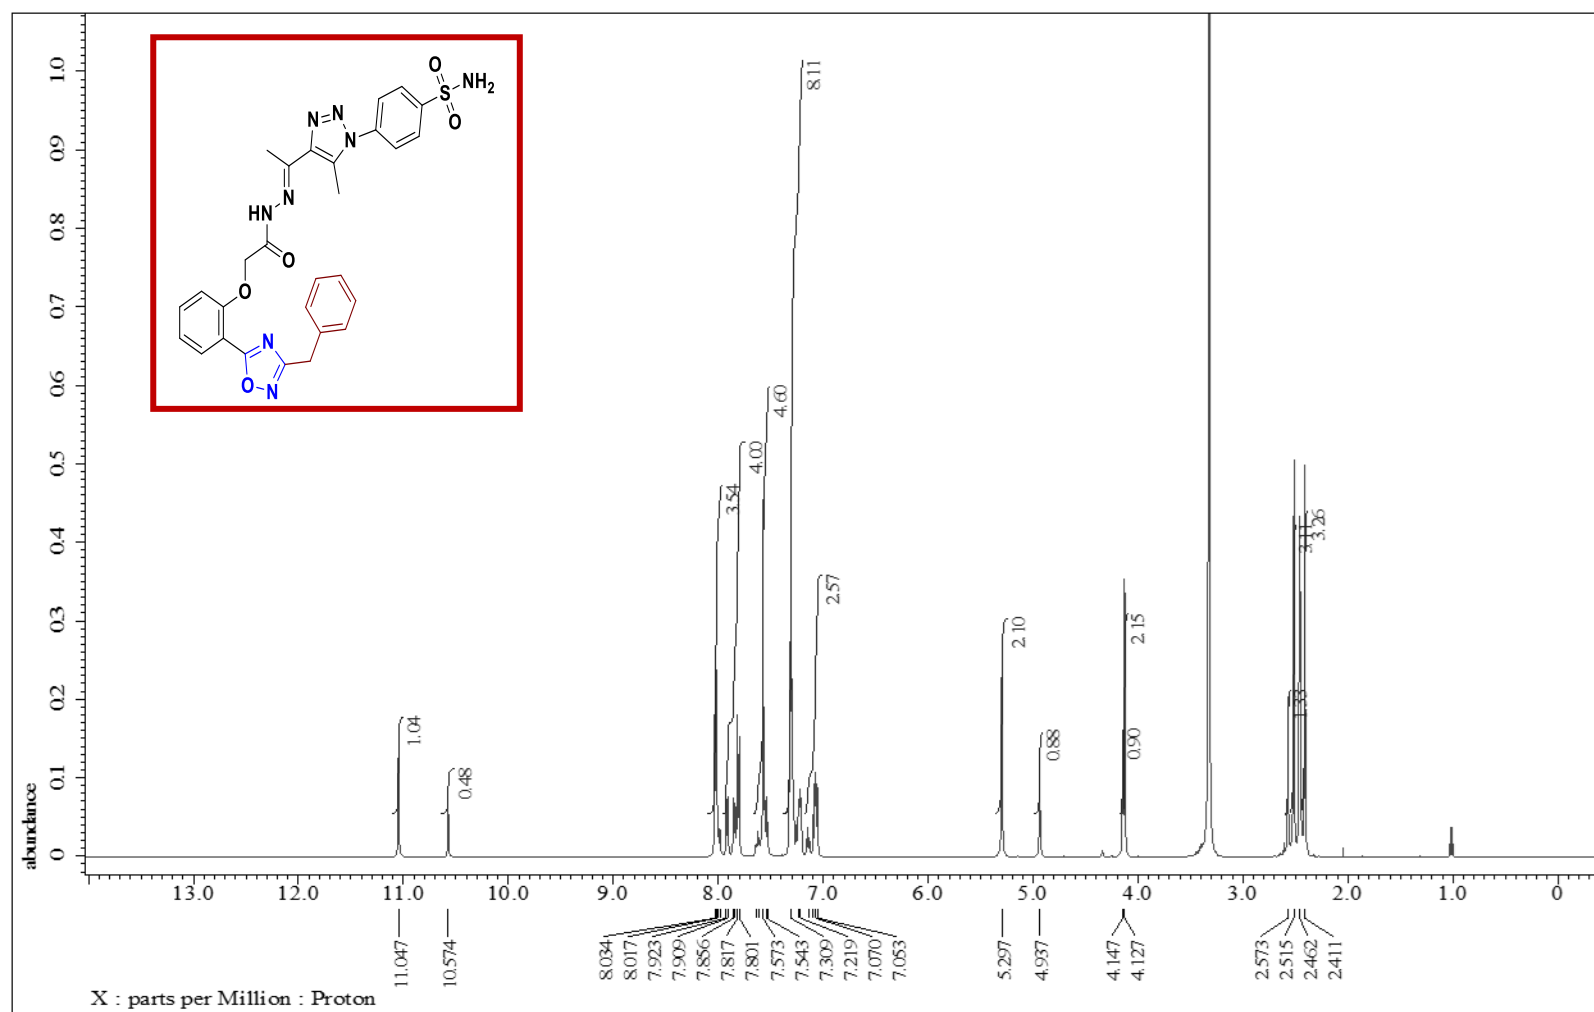

Figure 25. <sup>1</sup>H NMR of 12 (DMSO-d<sub>6</sub>)

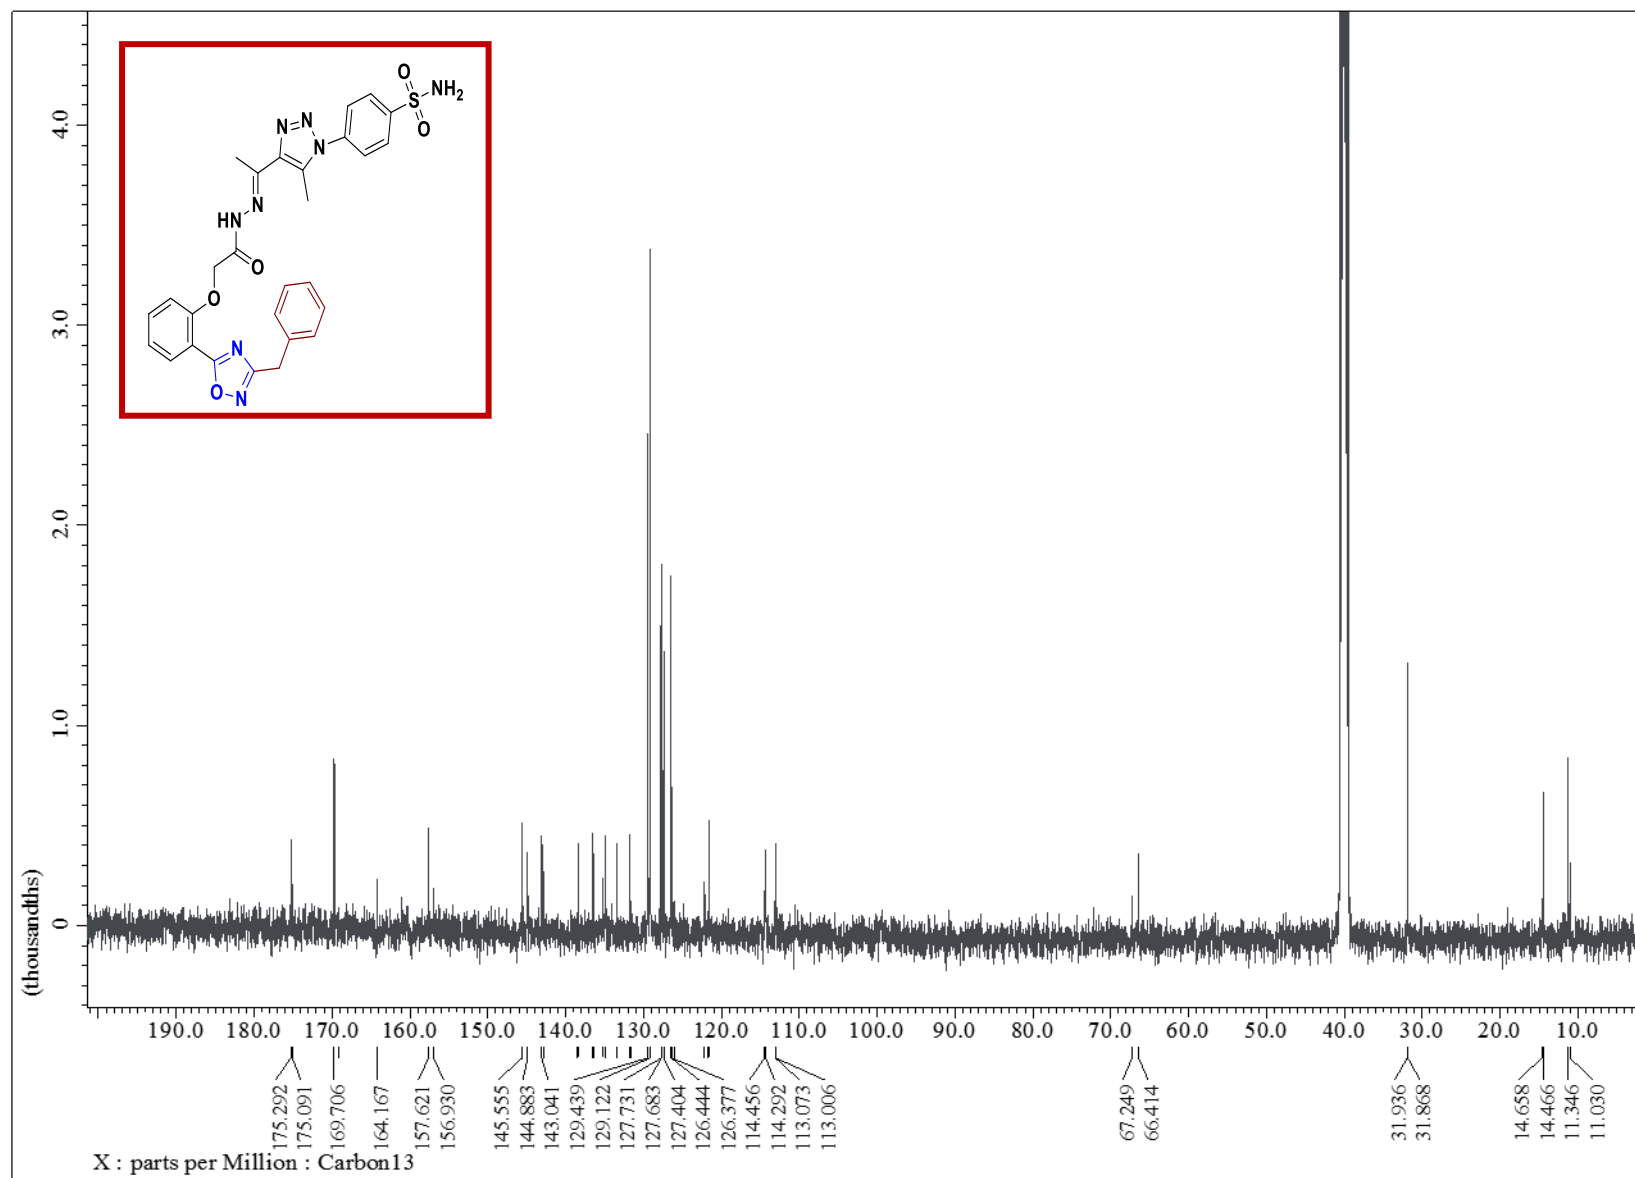

Figure 26.  $^{13}\text{C}$  NMR of 12 (DMSO- $d_6$ )

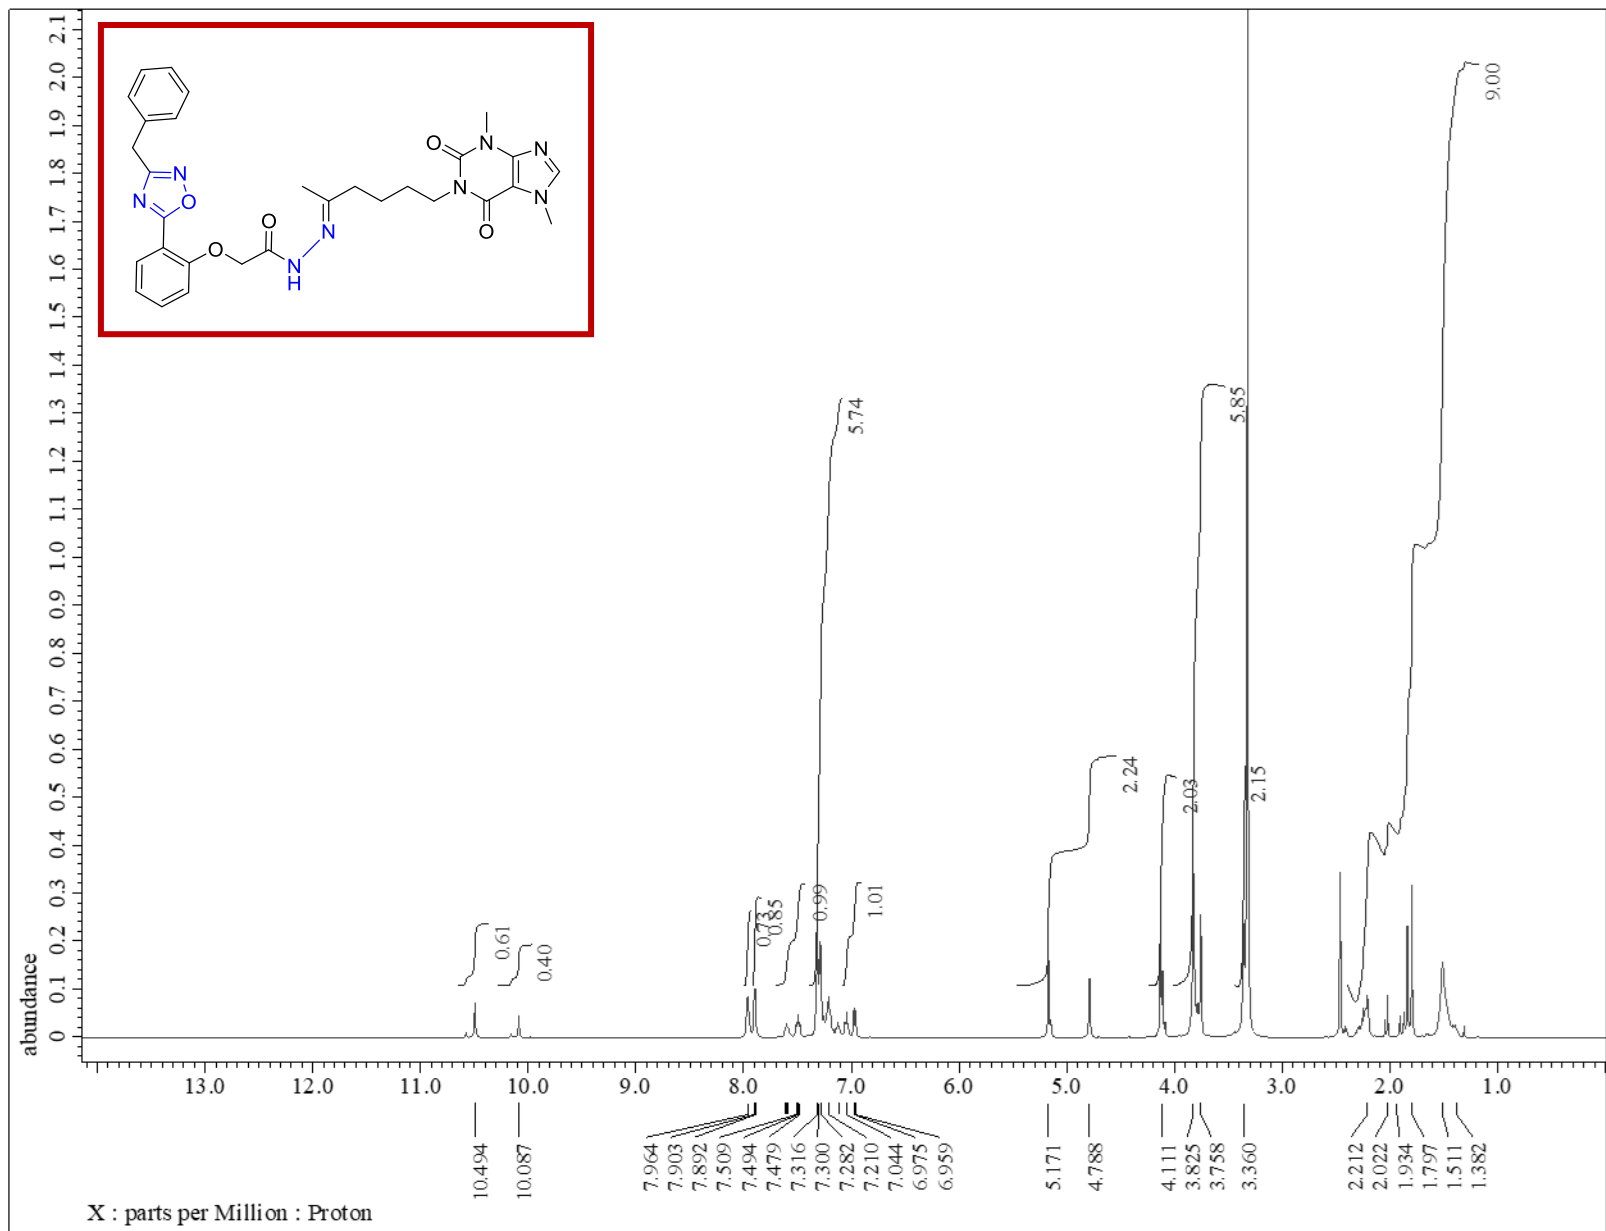

**Figure 27**  $^1\text{H}$  NMR of **13a** (DMSO- $d_6$ )

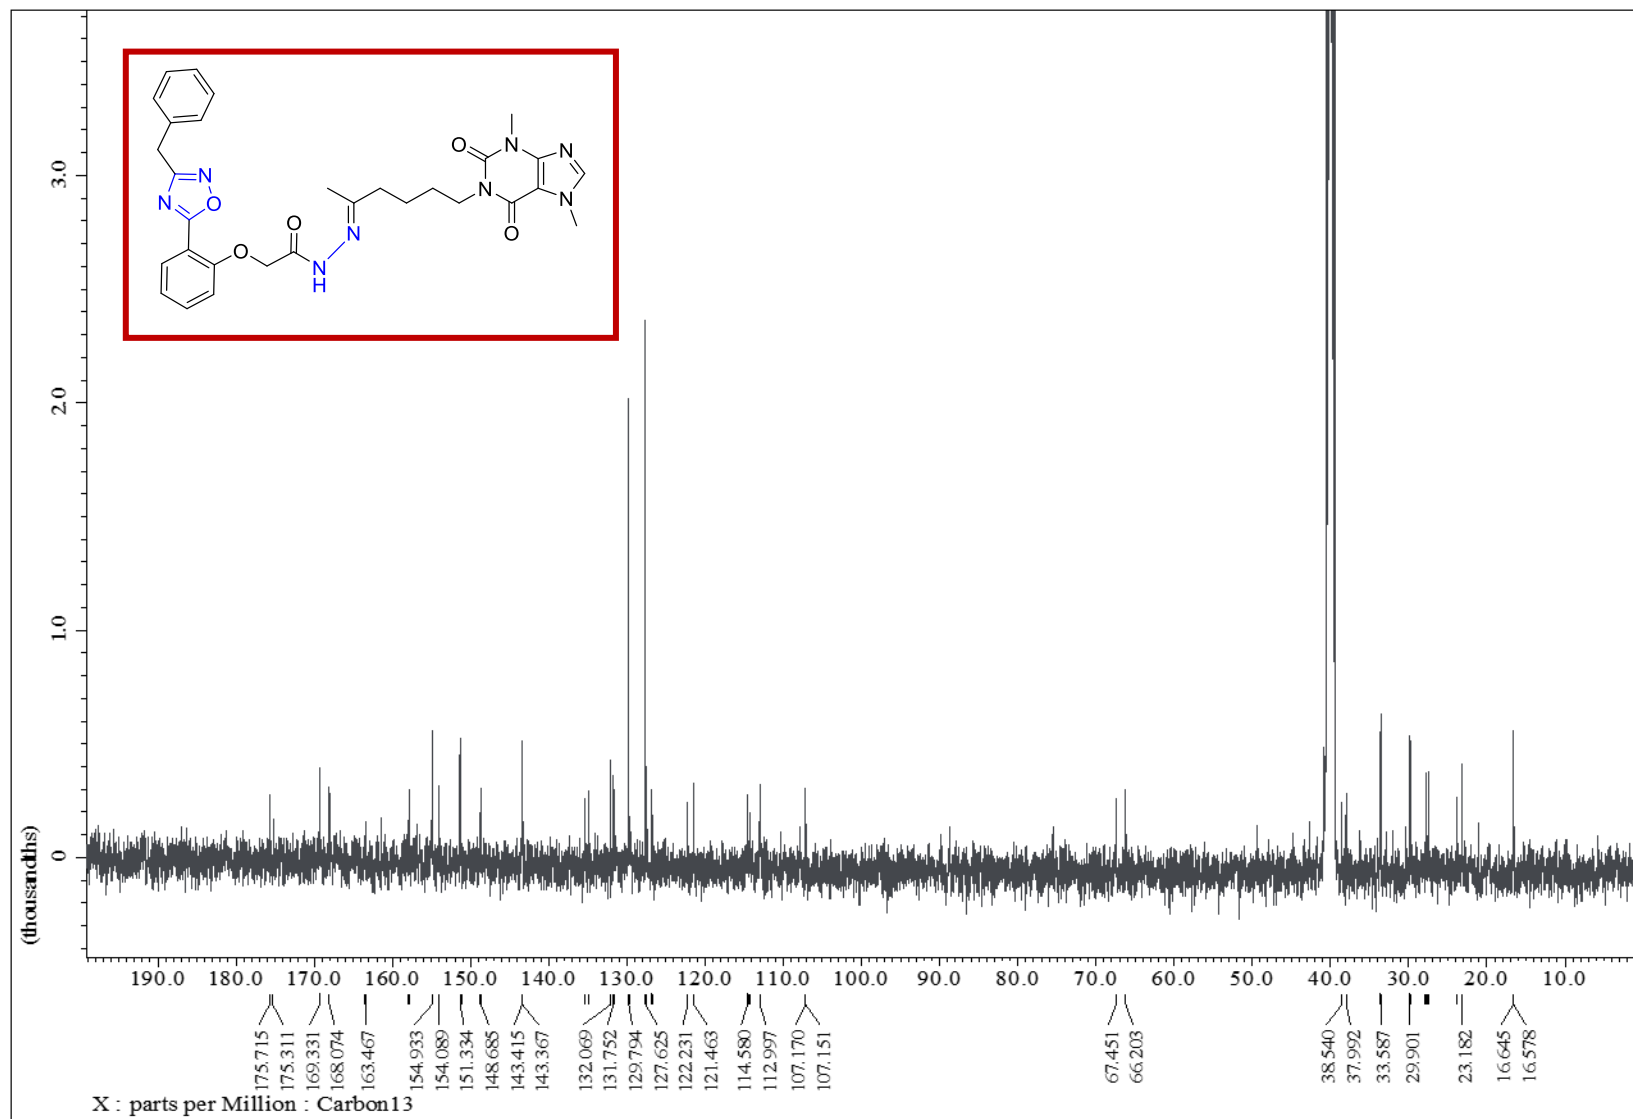

Figure 28.  $^{13}\text{C}$  NMR of 13a (DMSO- $d_6$ )

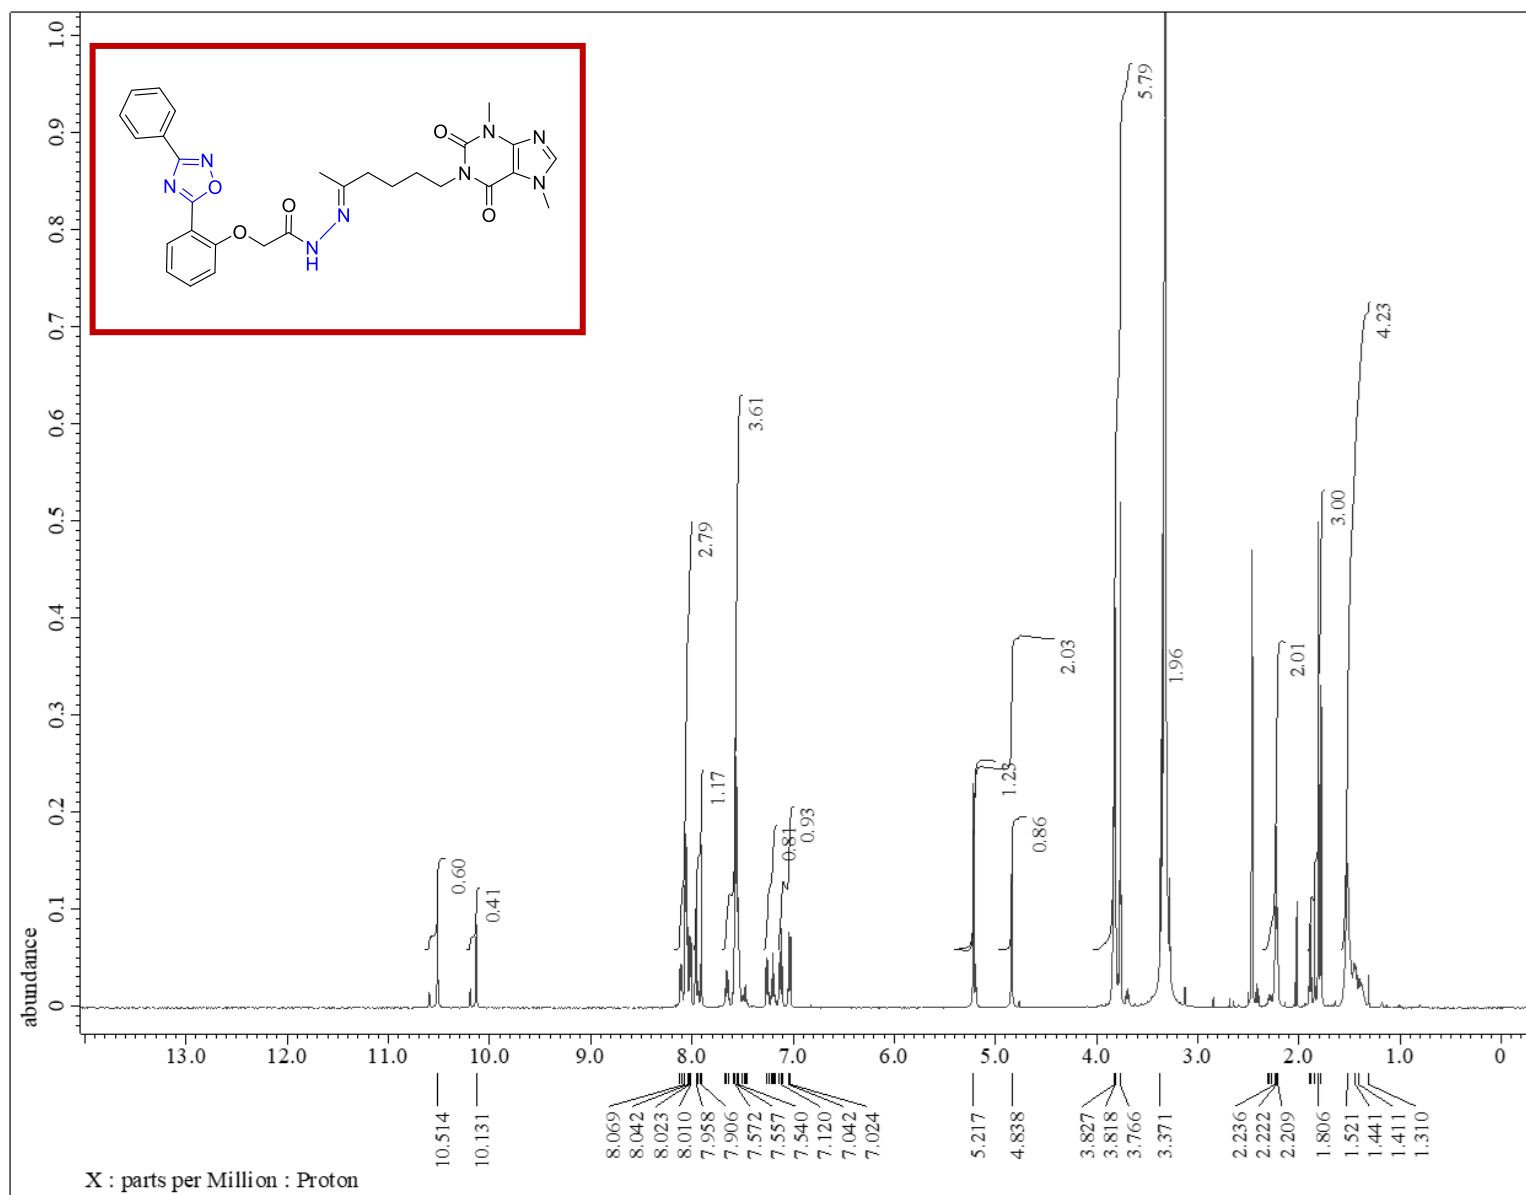

**Figure 29. <sup>1</sup>H NMR of 13b (DMSO-d<sub>6</sub>)**

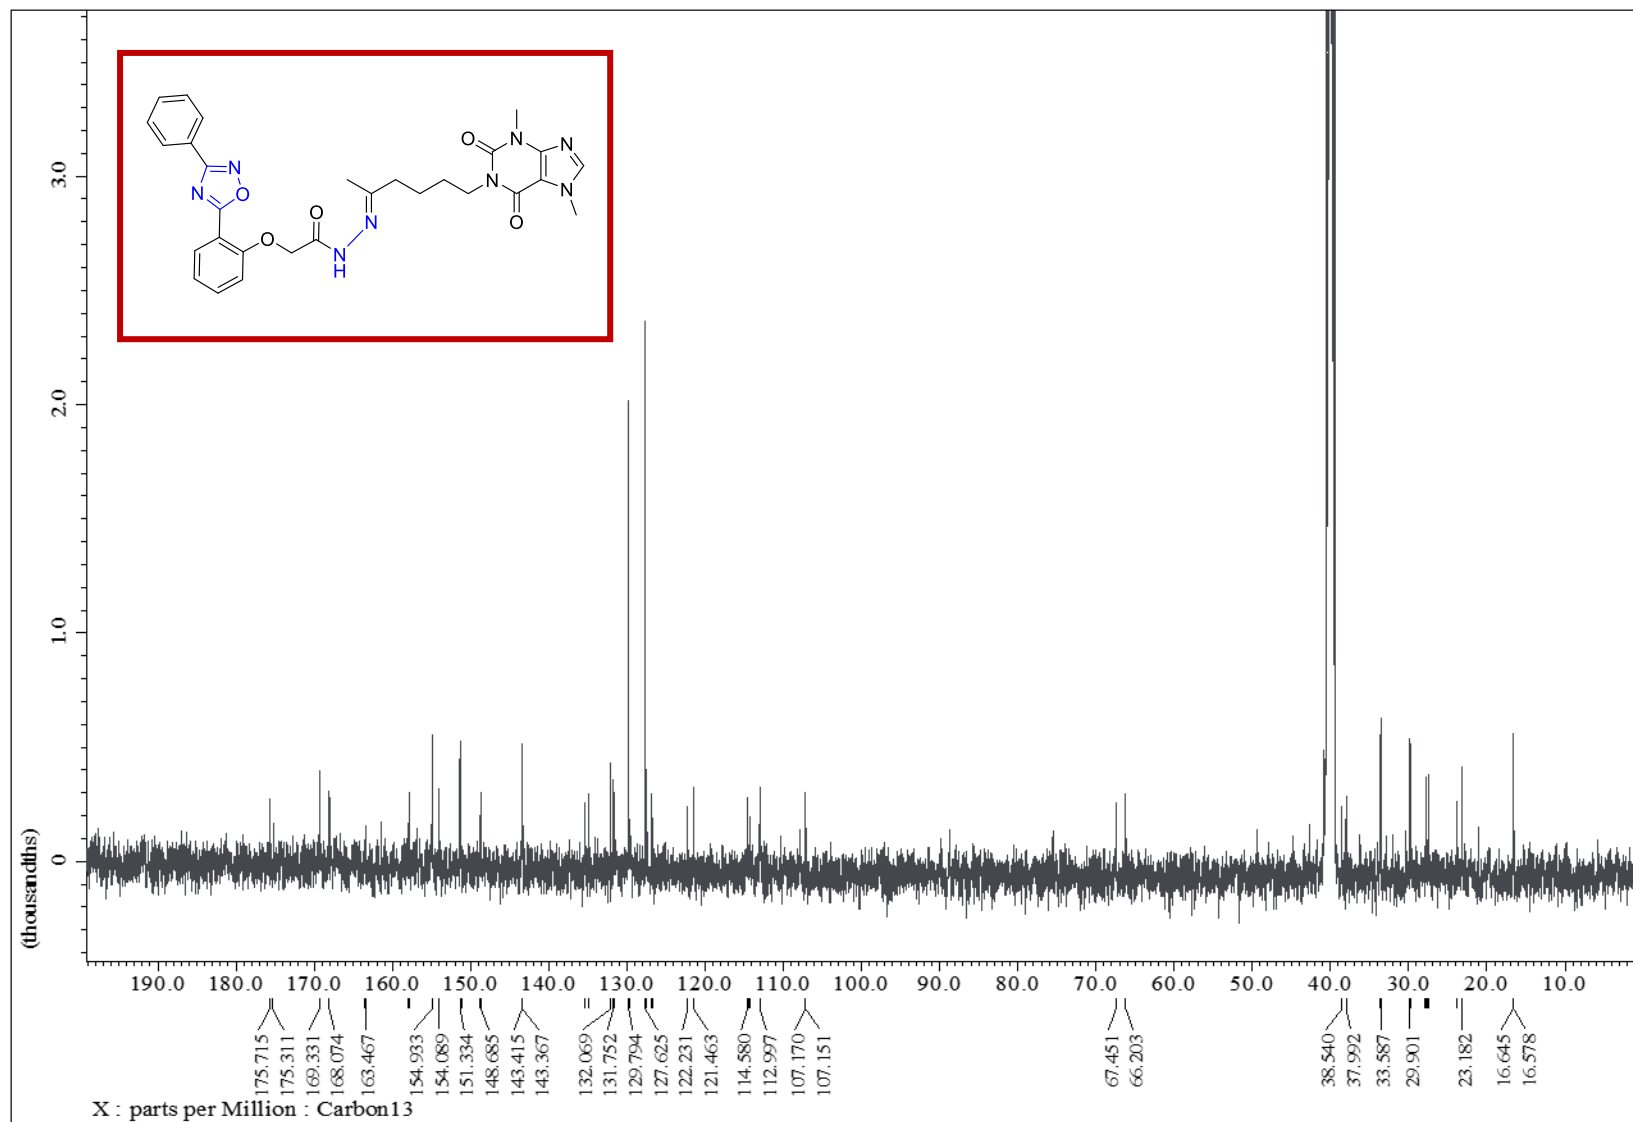

Figure 30.  $^{13}\text{C}$  NMR of 13b (DMSO- $d_6$ )



# IR spectra of the synthesized compounds

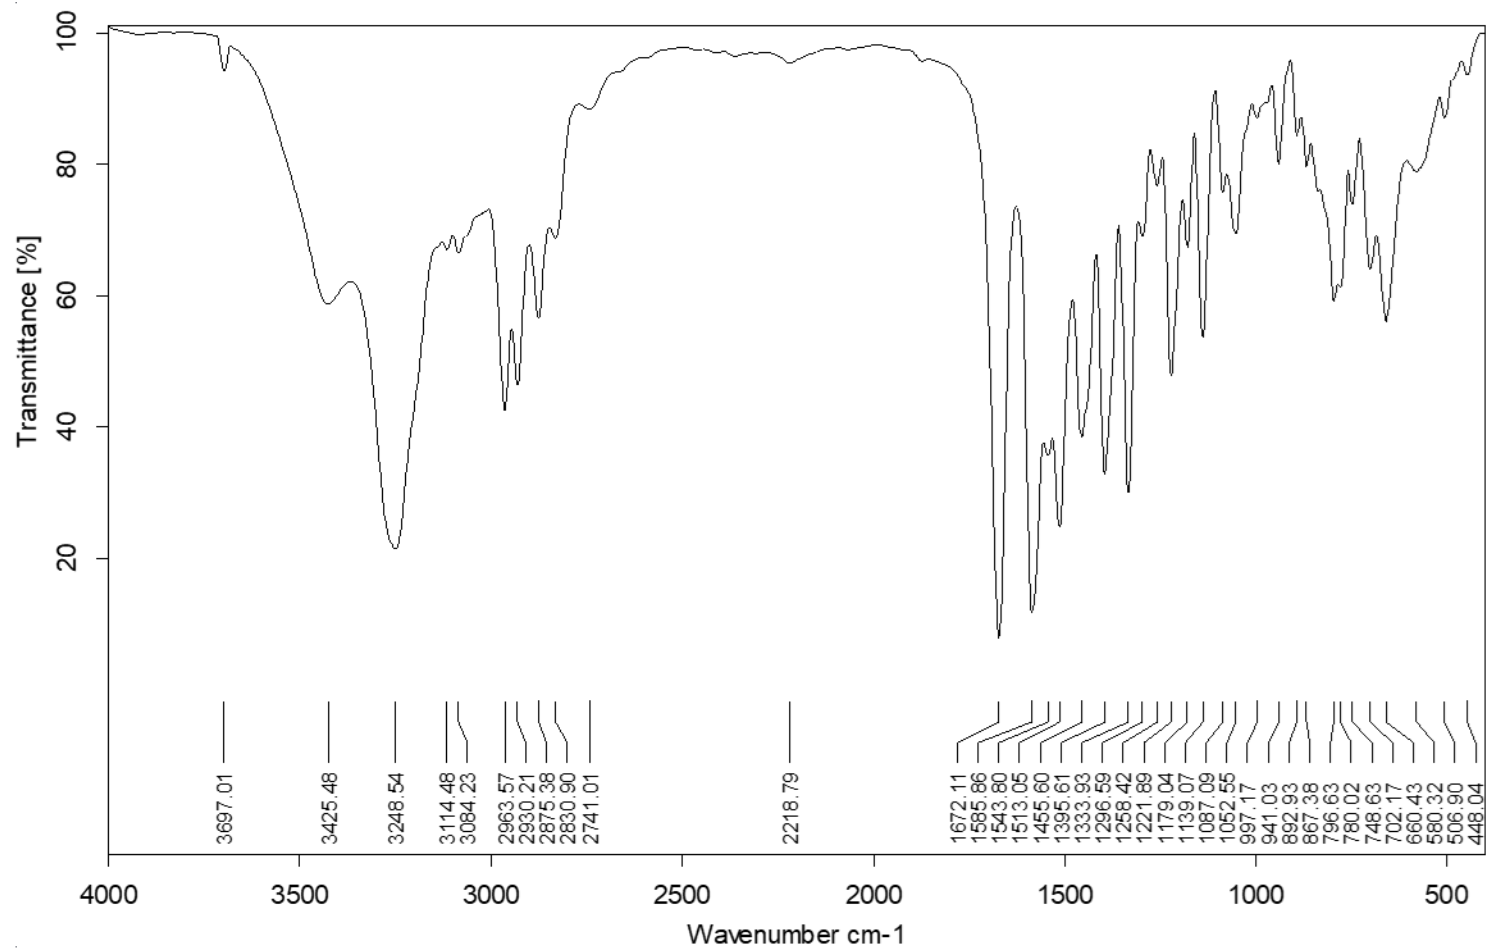

Figure 31. IR of 2a

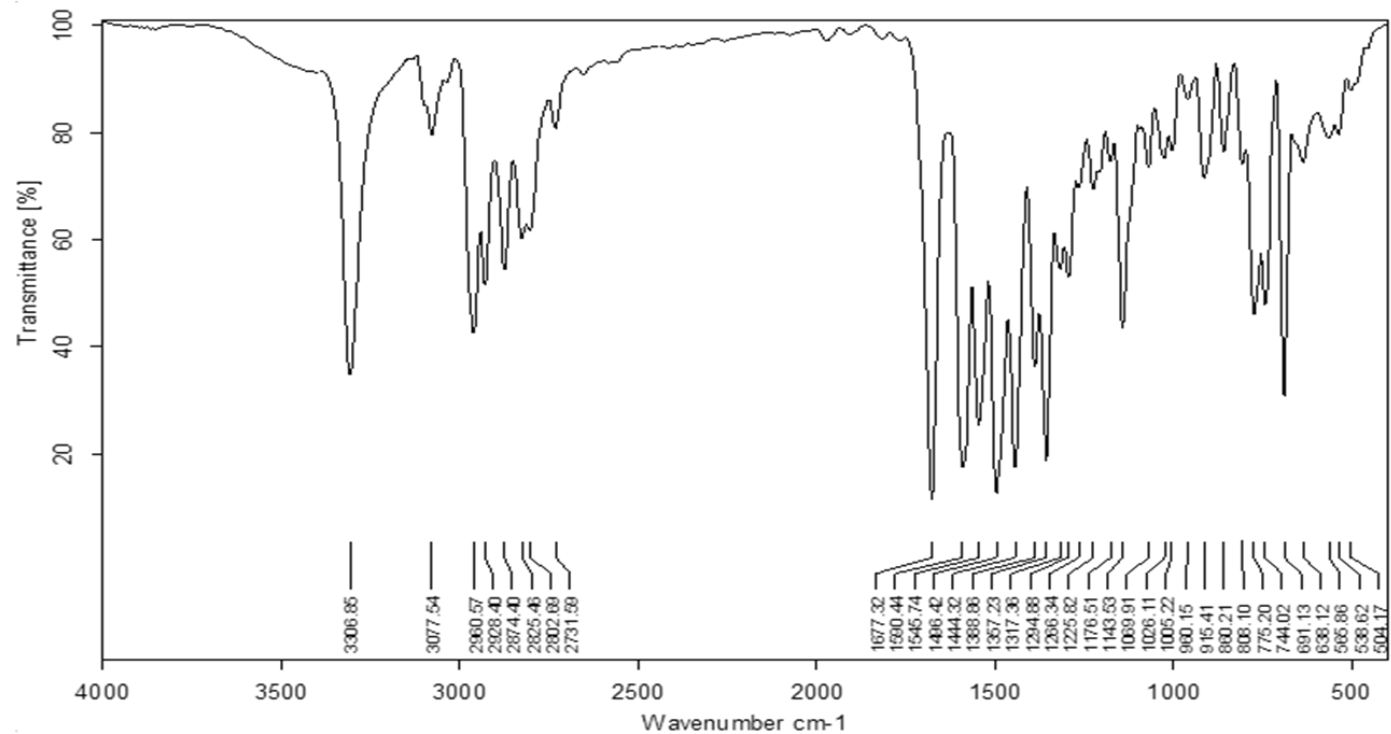

Figure 32. IR of 2b

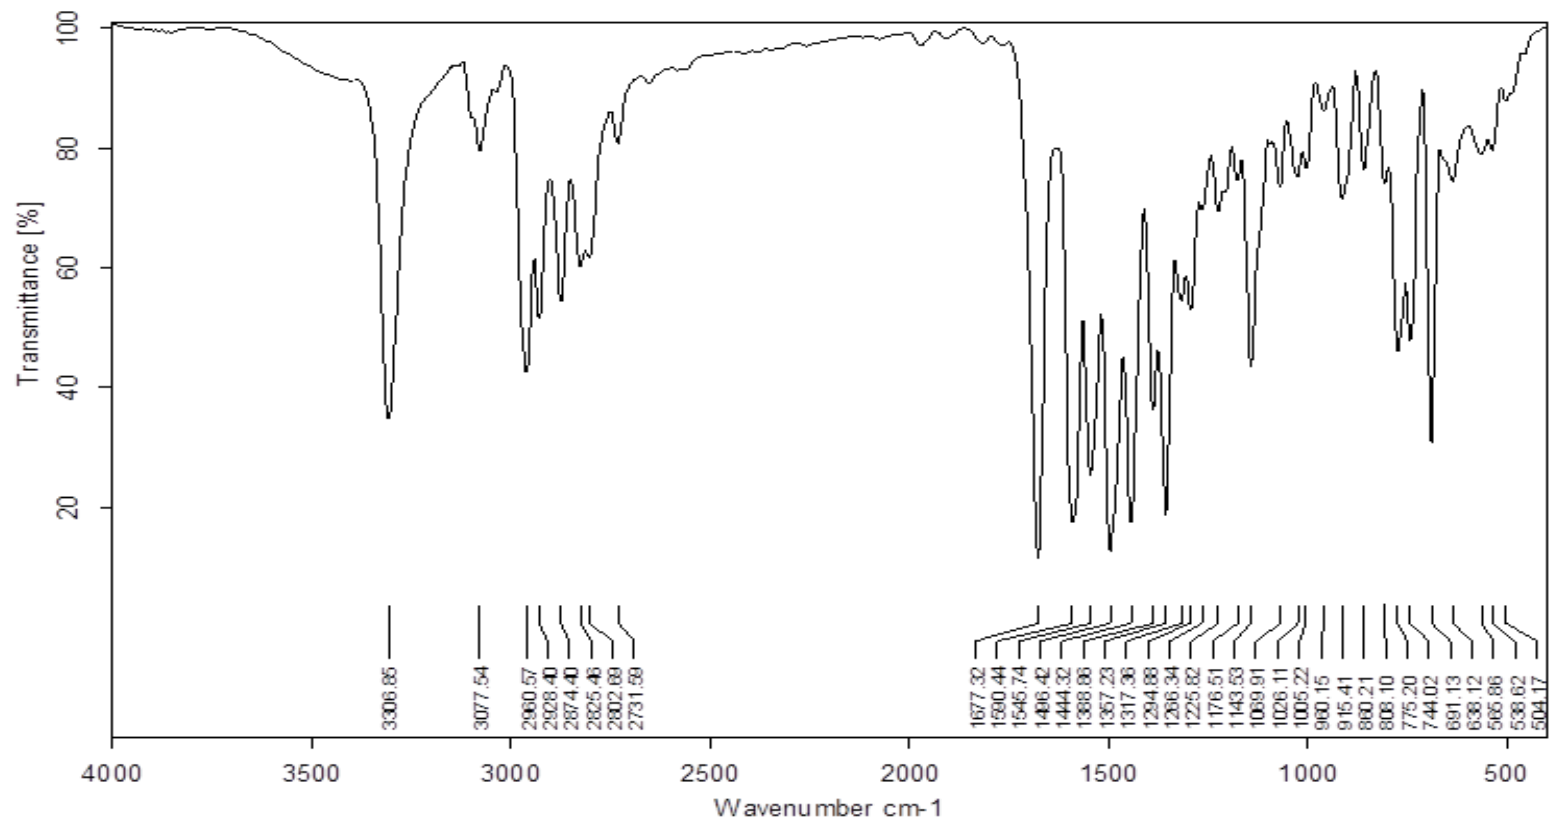

Figure 33. IR of 2c

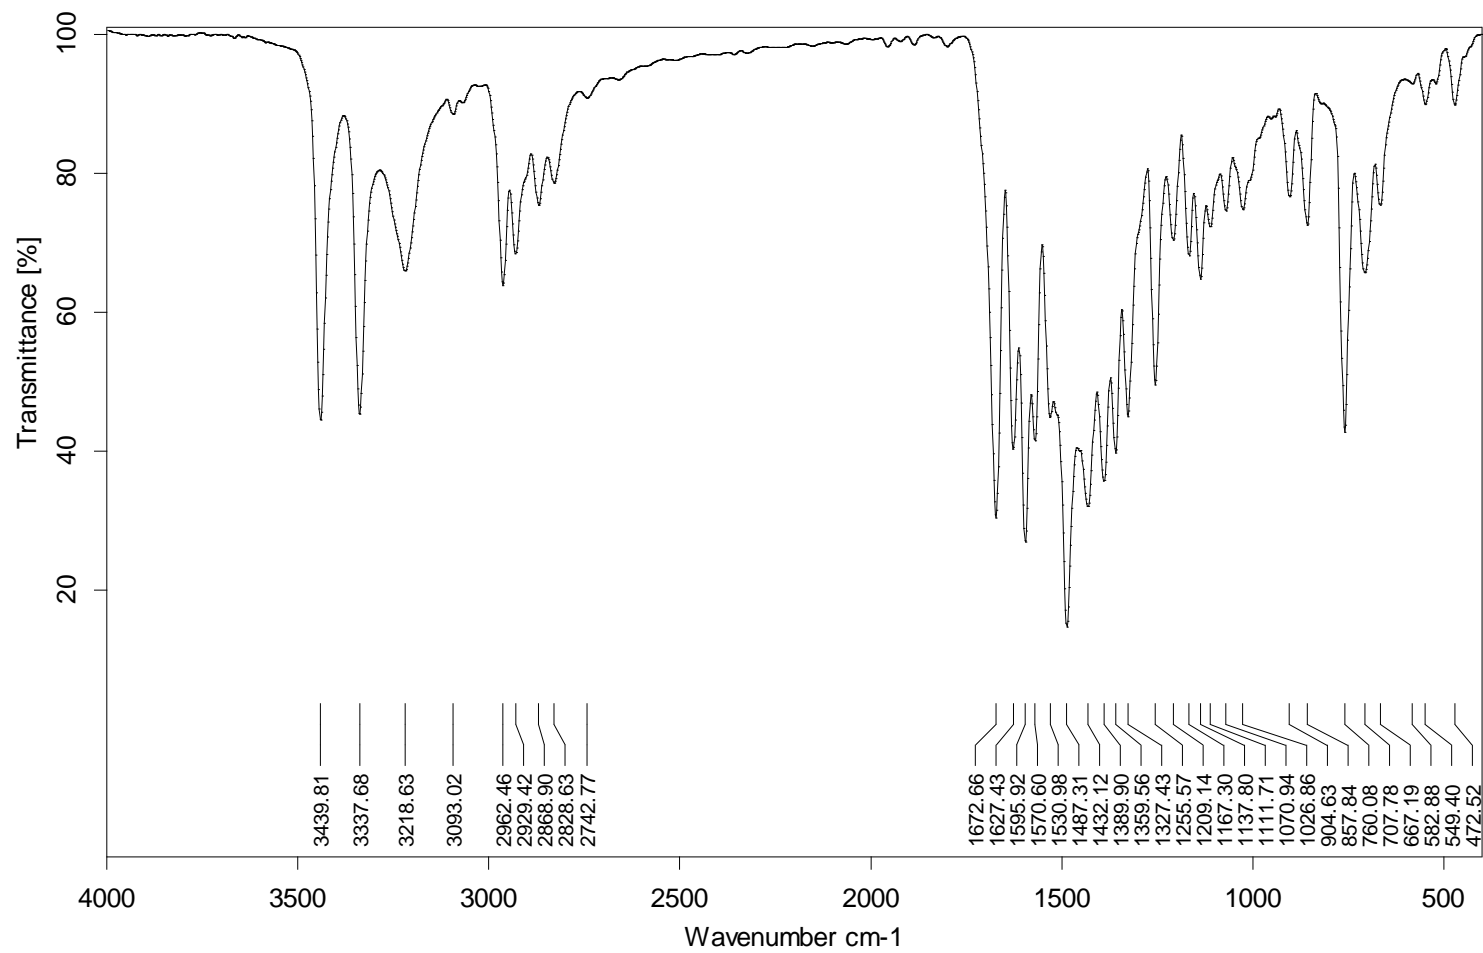

Figure 34. IR of 2d

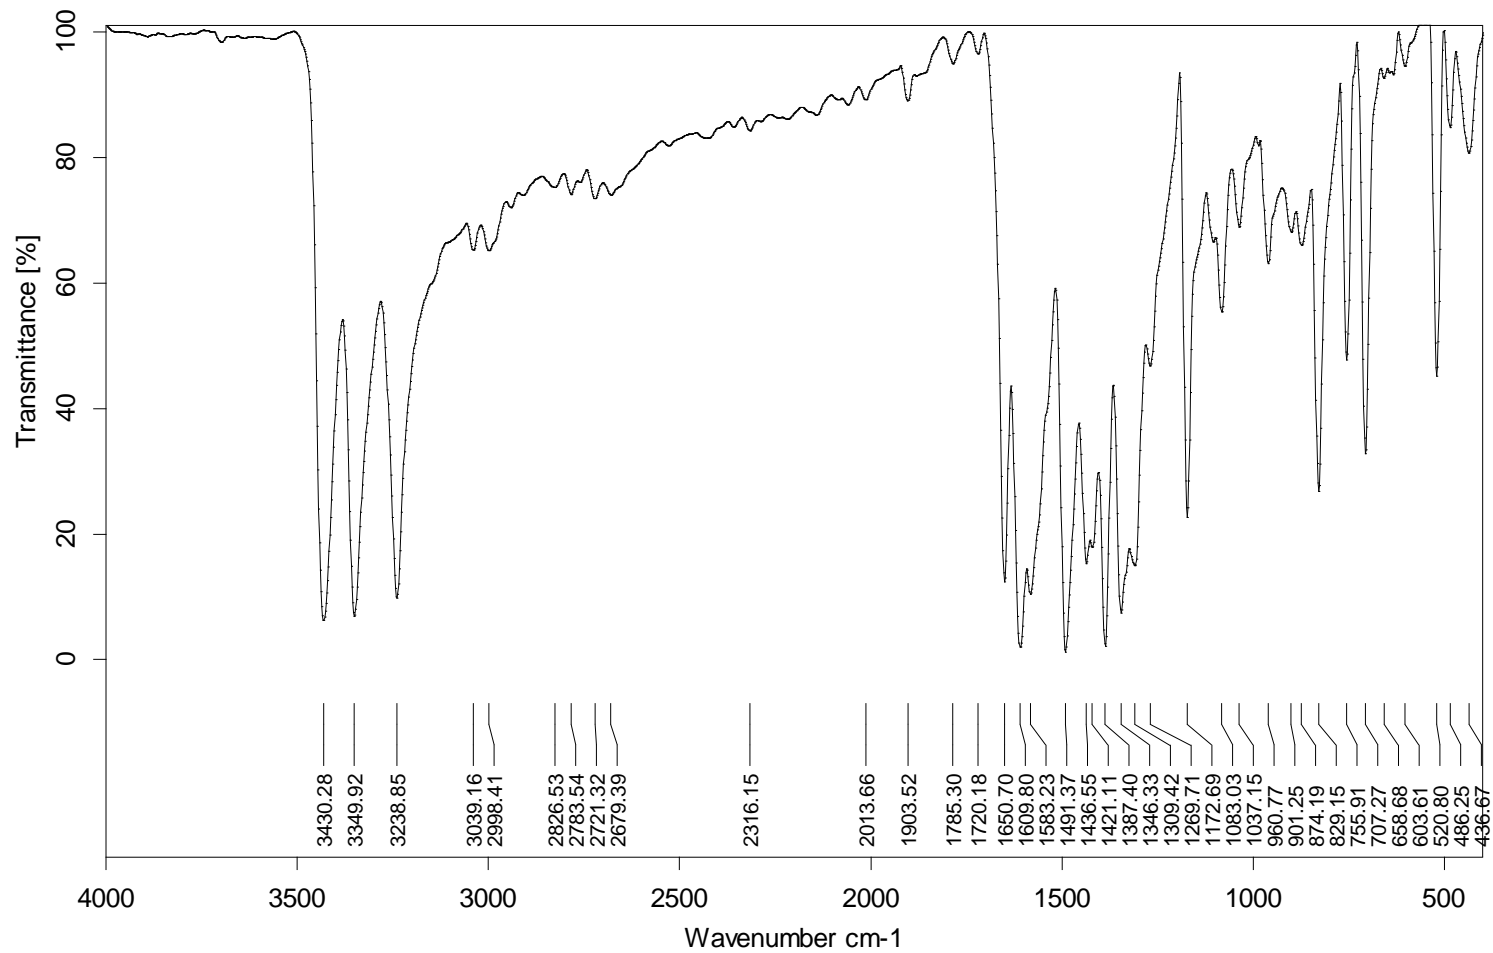

Figure 35. IR of 3a

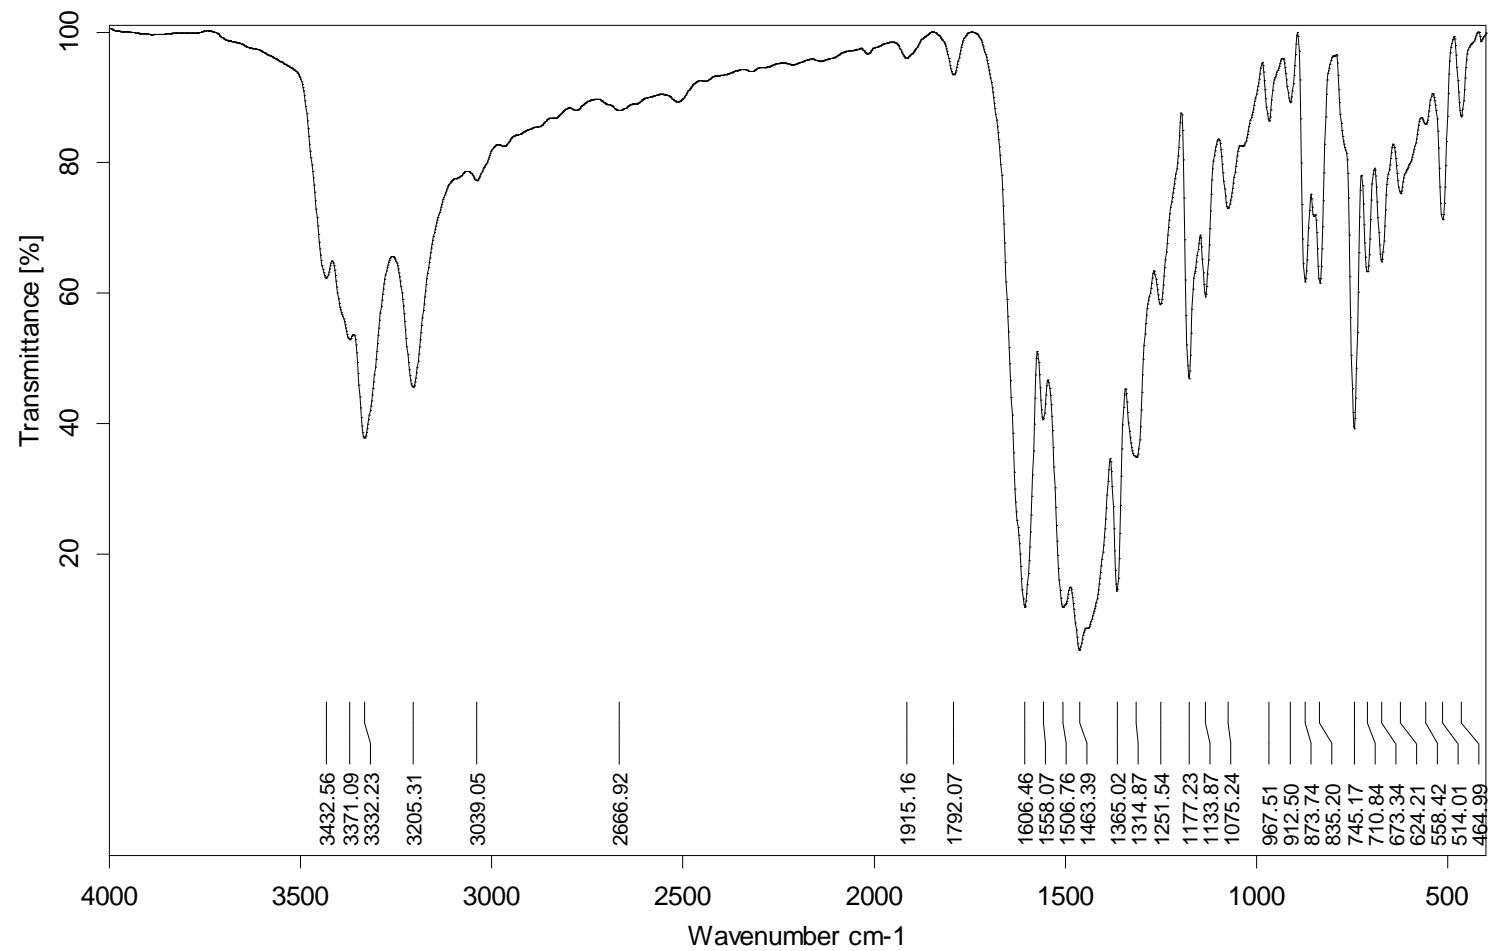

**Figure 36. IR of 3b**

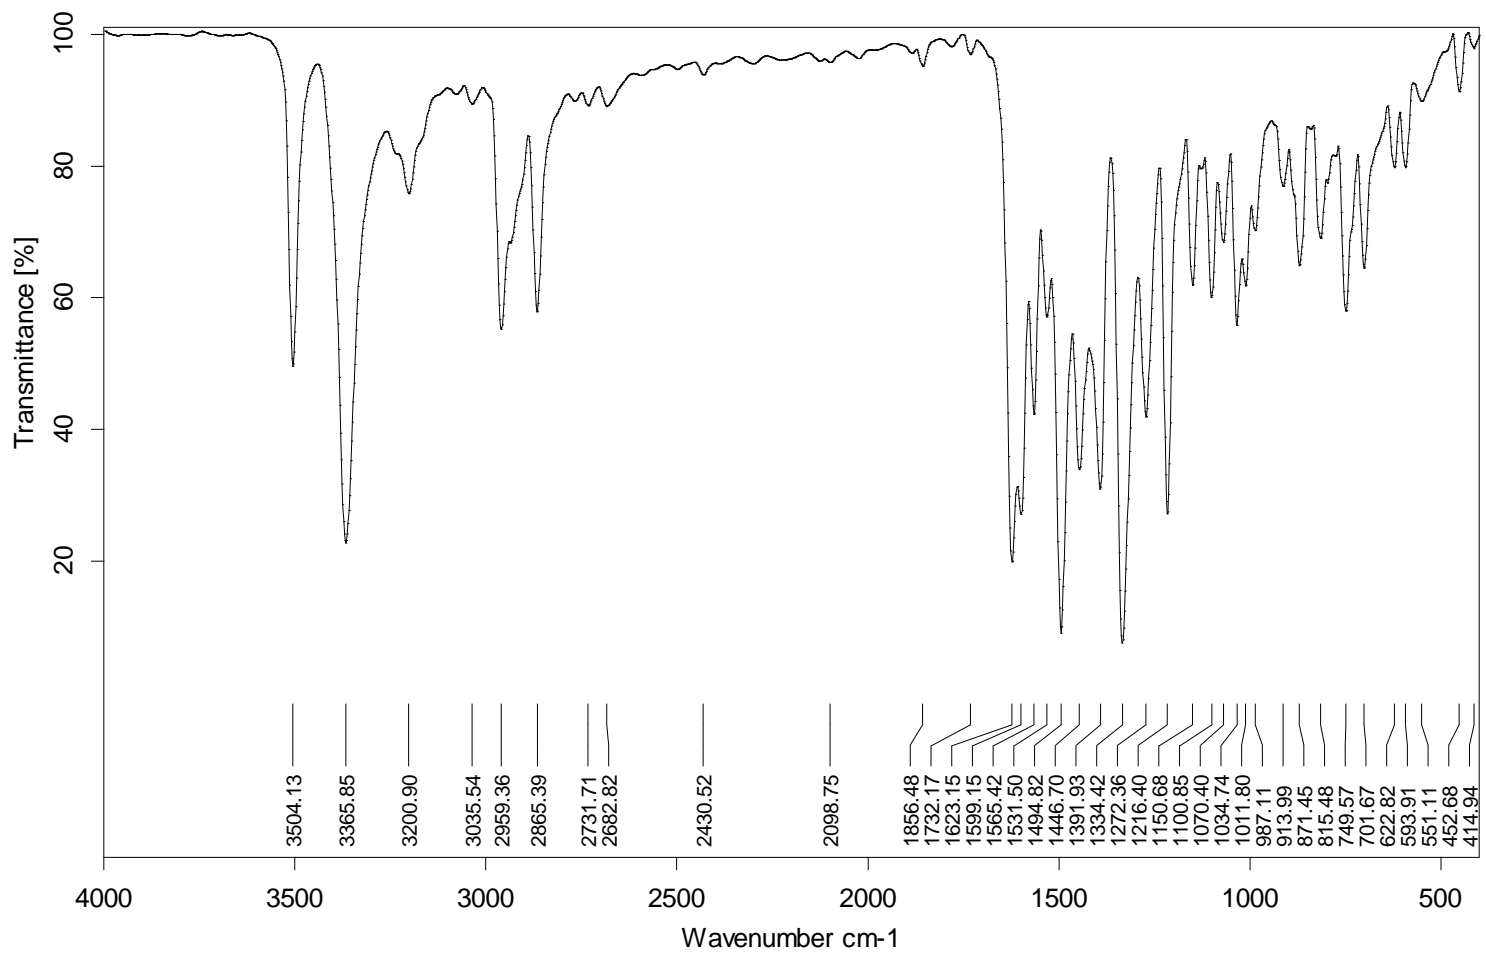

Figure 37. IR of 4a

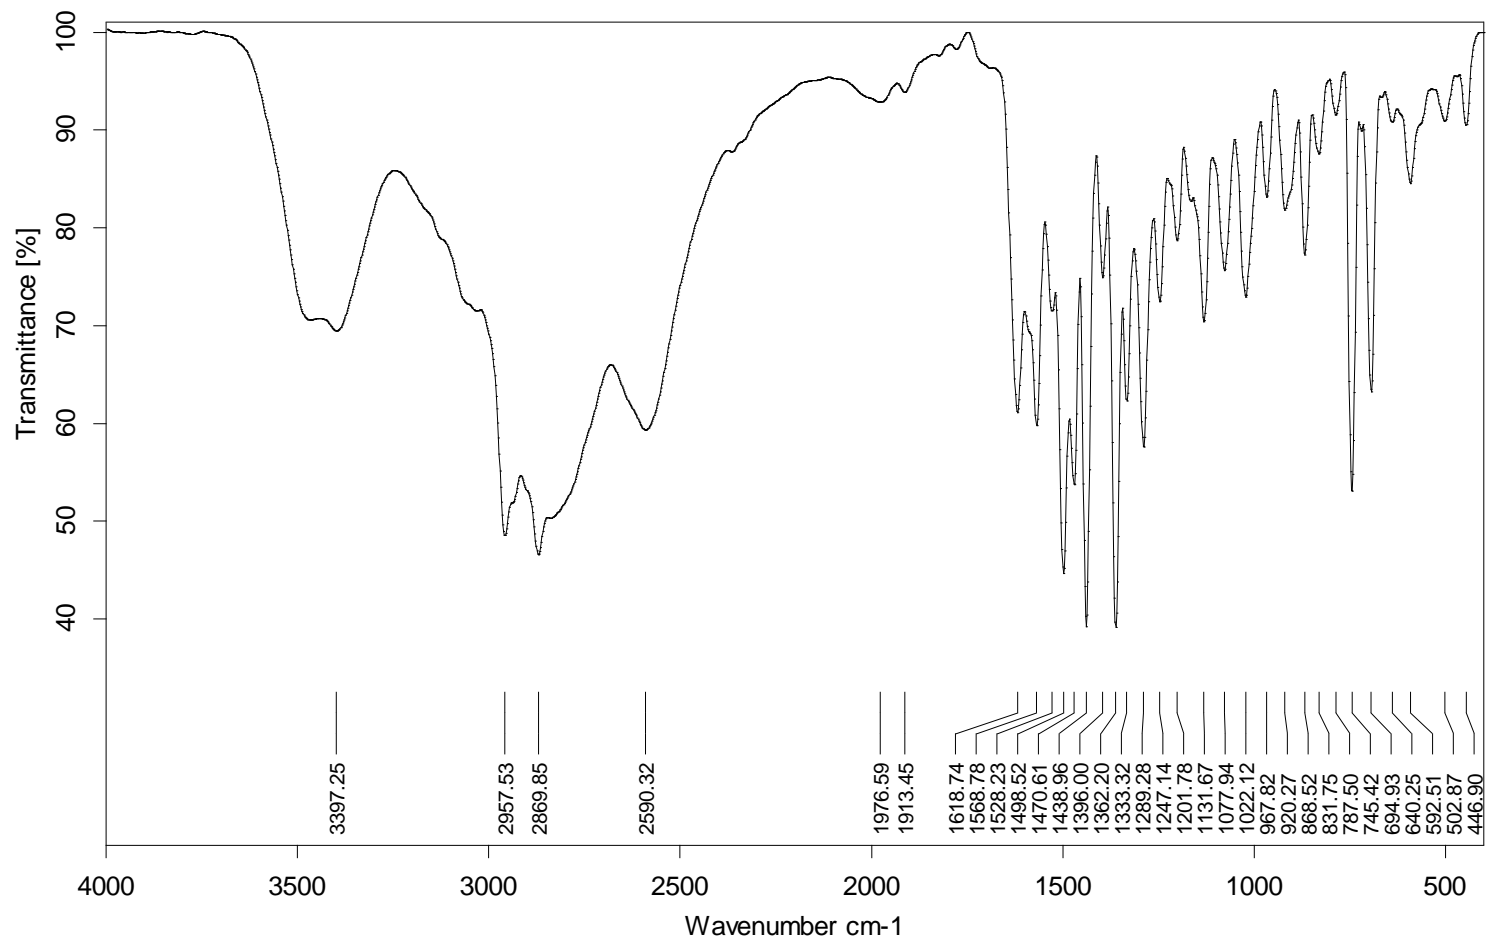

Figure 38. IR of 4b



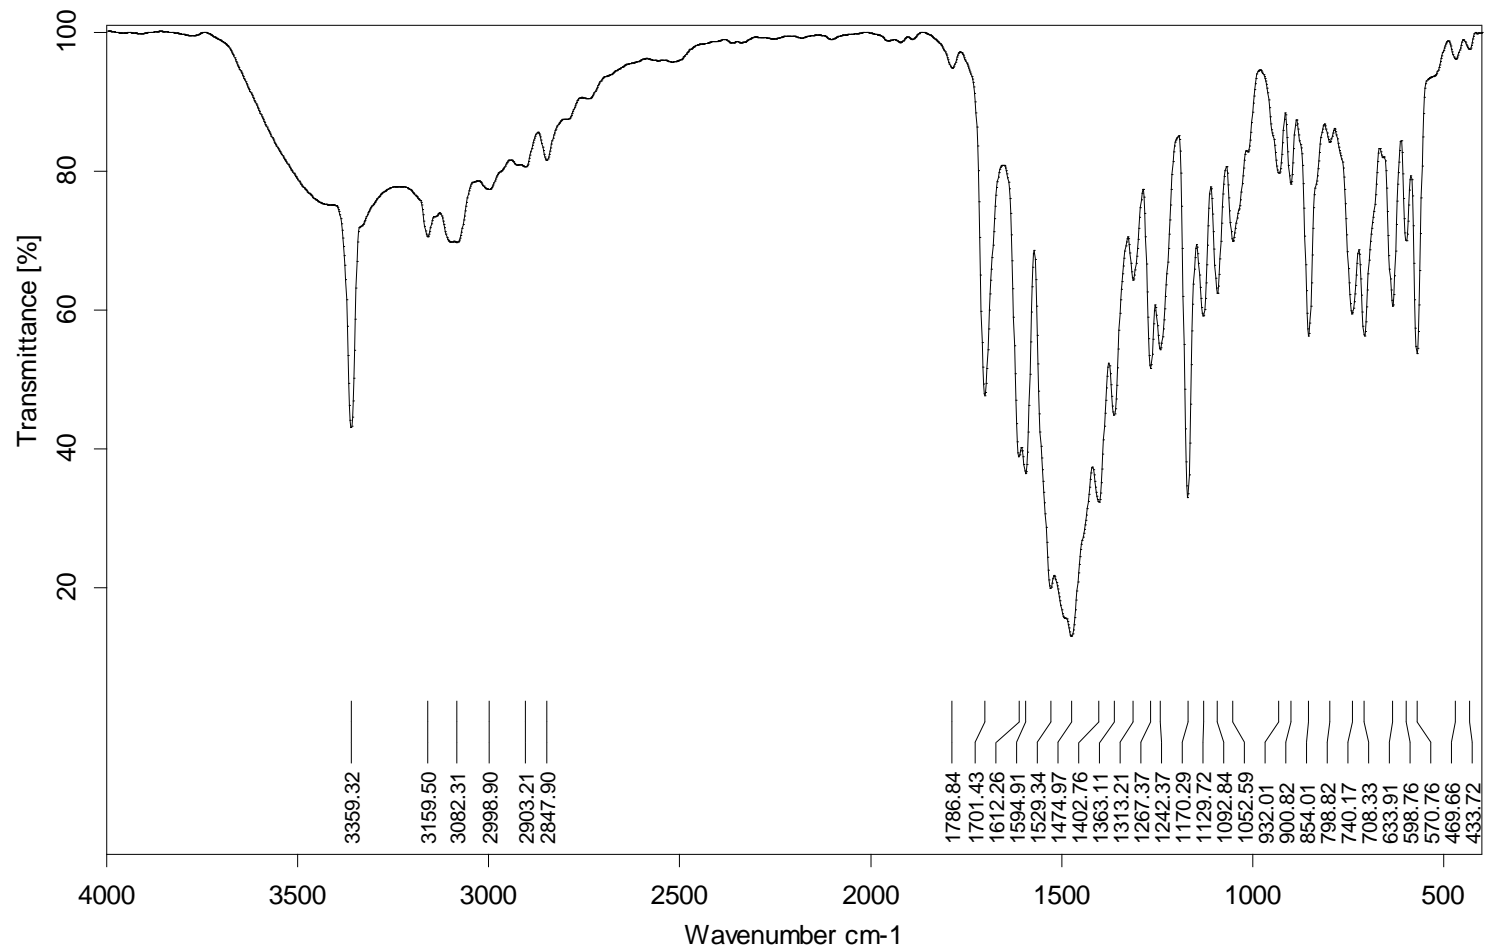

Figure 39. IR of 6

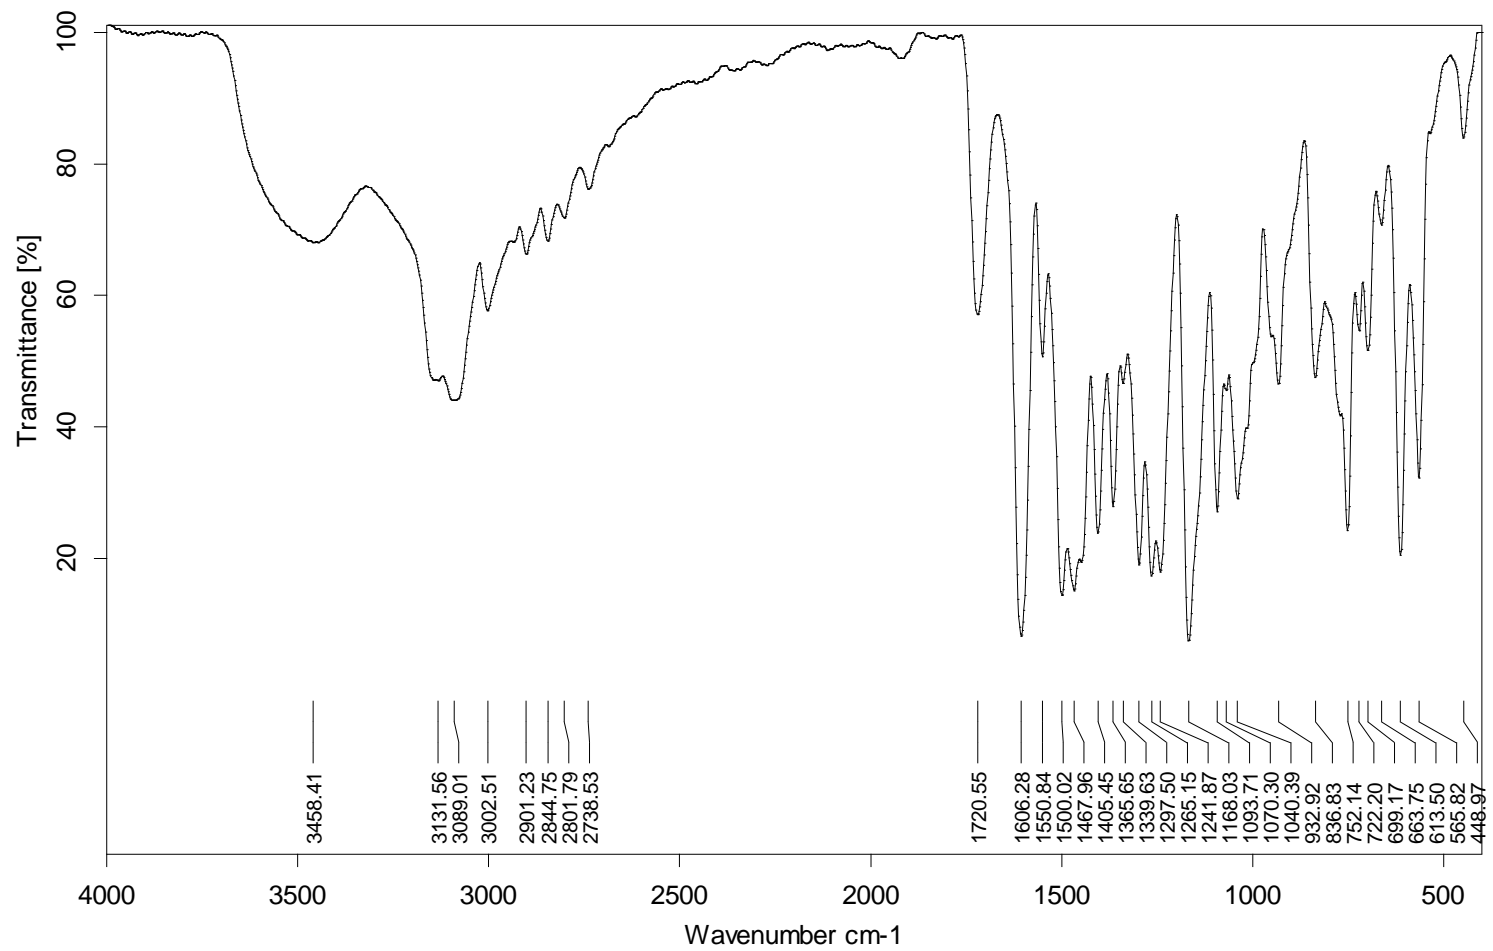

Figure 40. IR of 9a

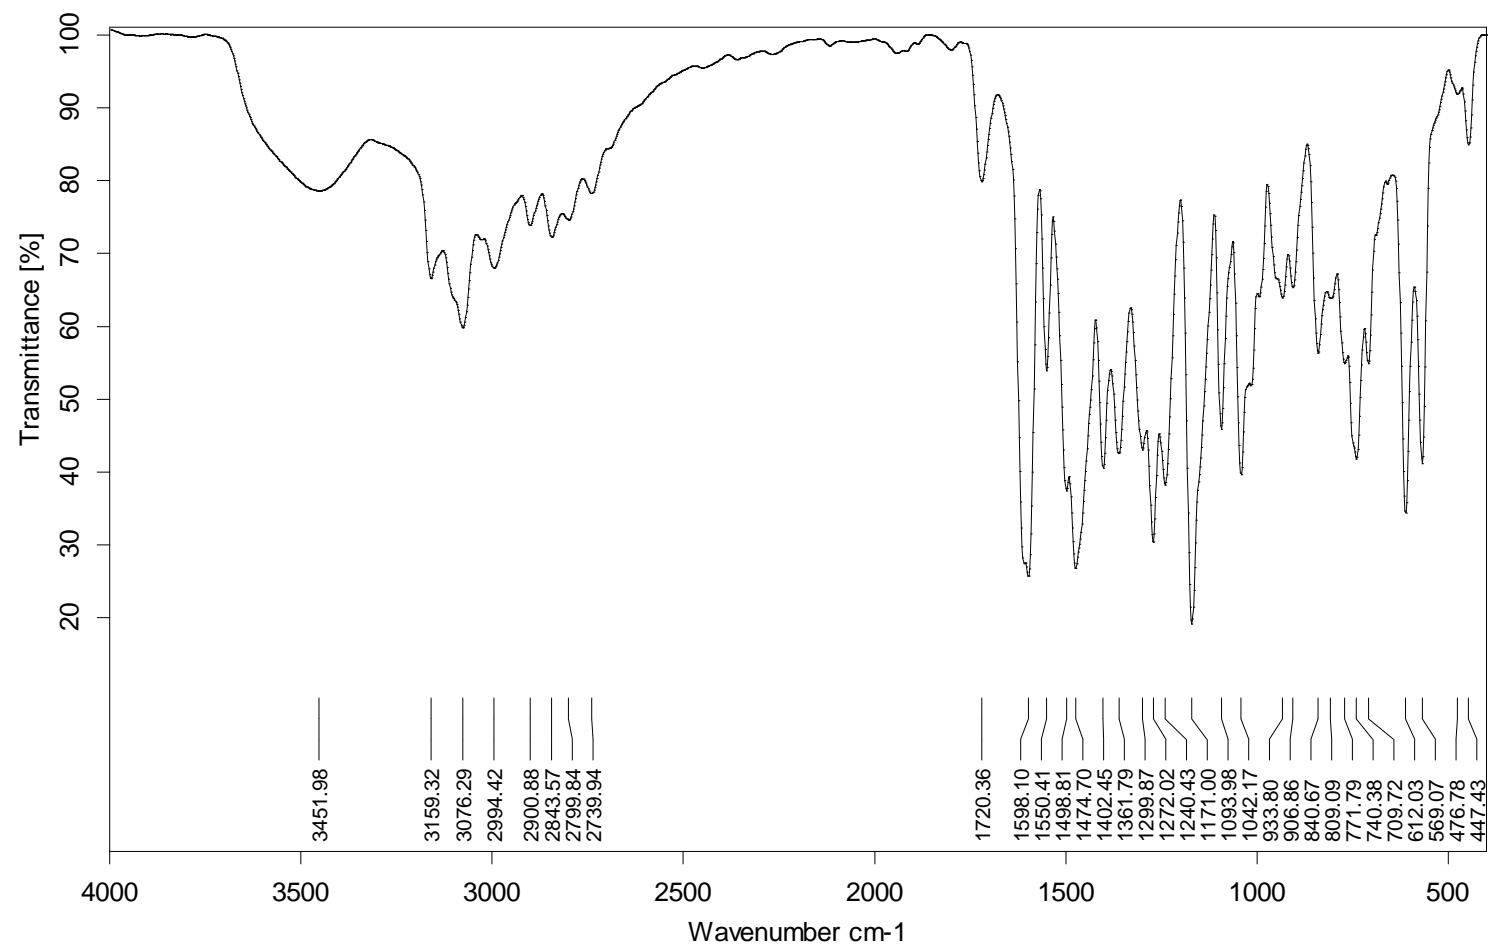

**Figure 41. IR of 9b**

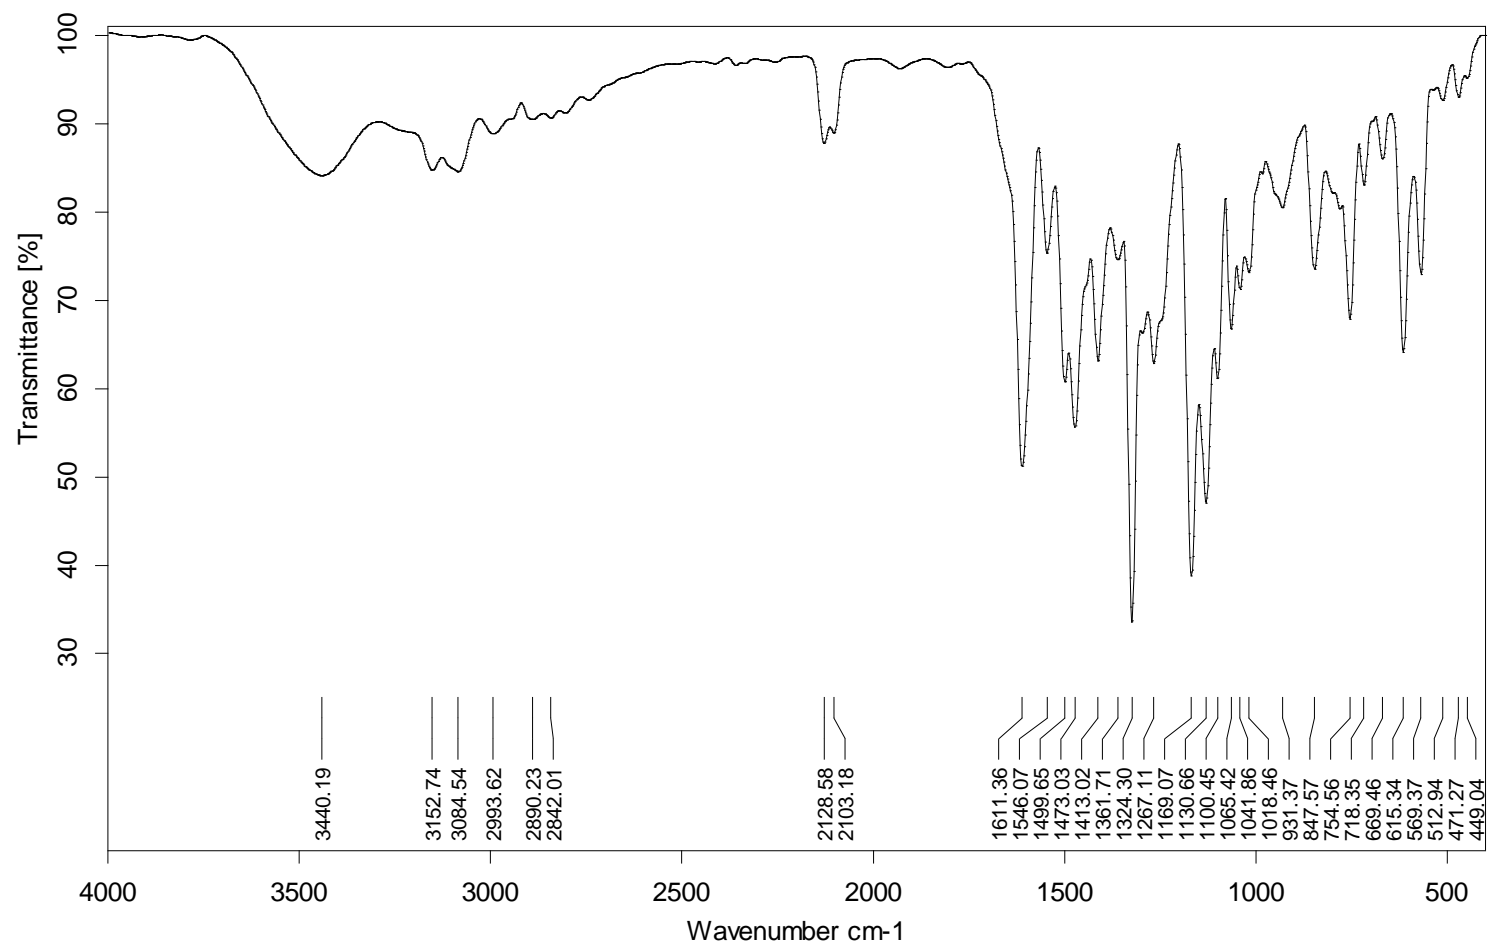

Figure 42. IR of 3b

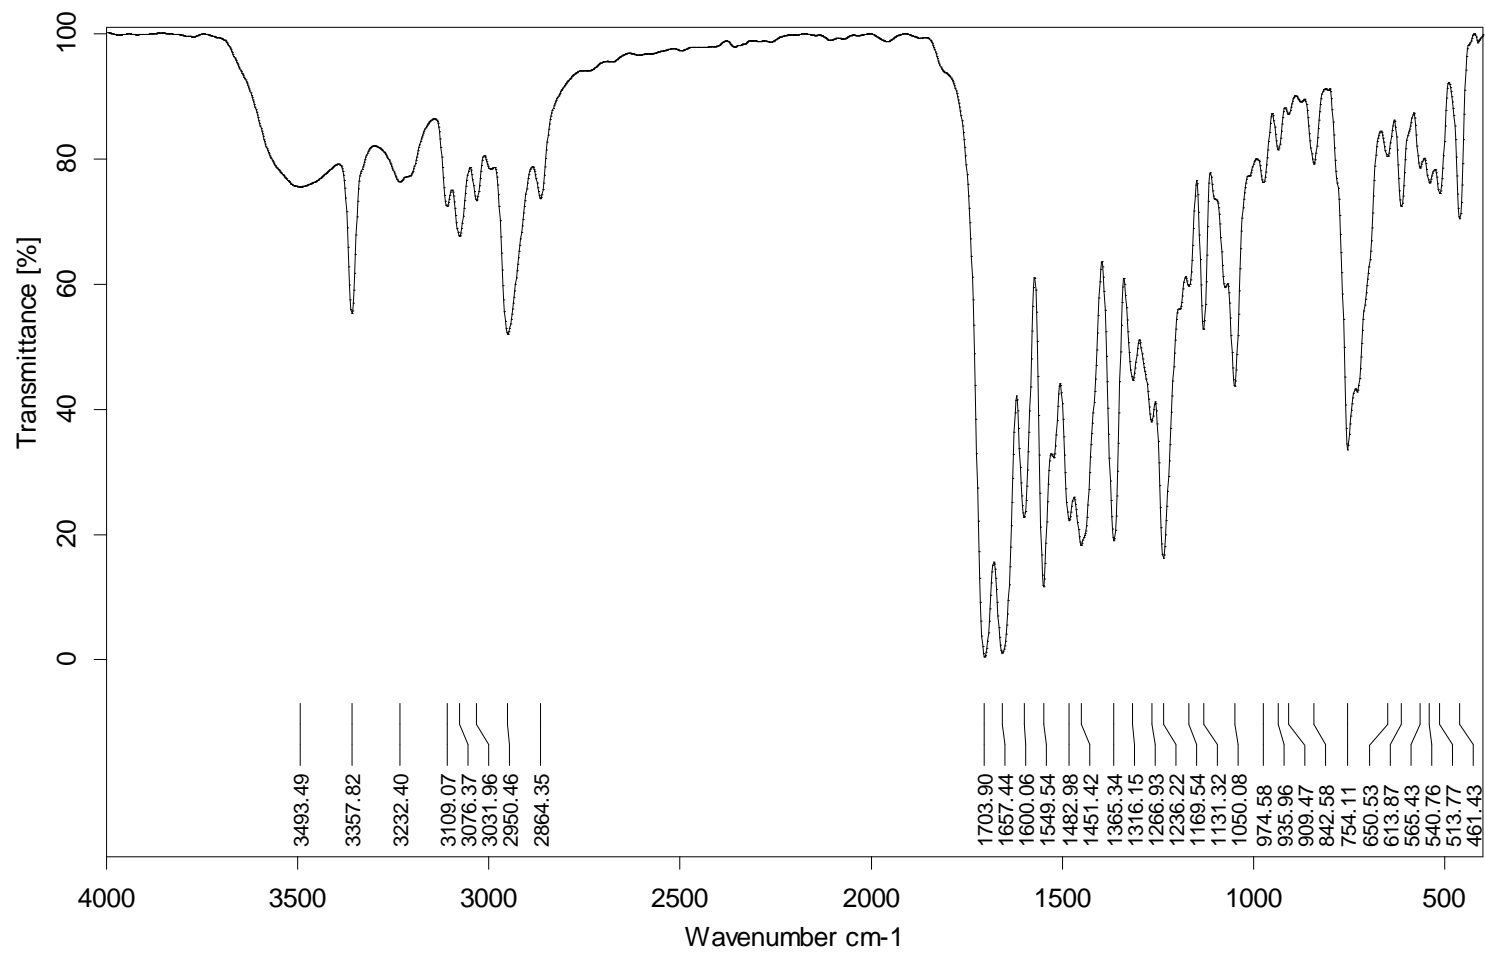

**Figure 43.** IR of 12

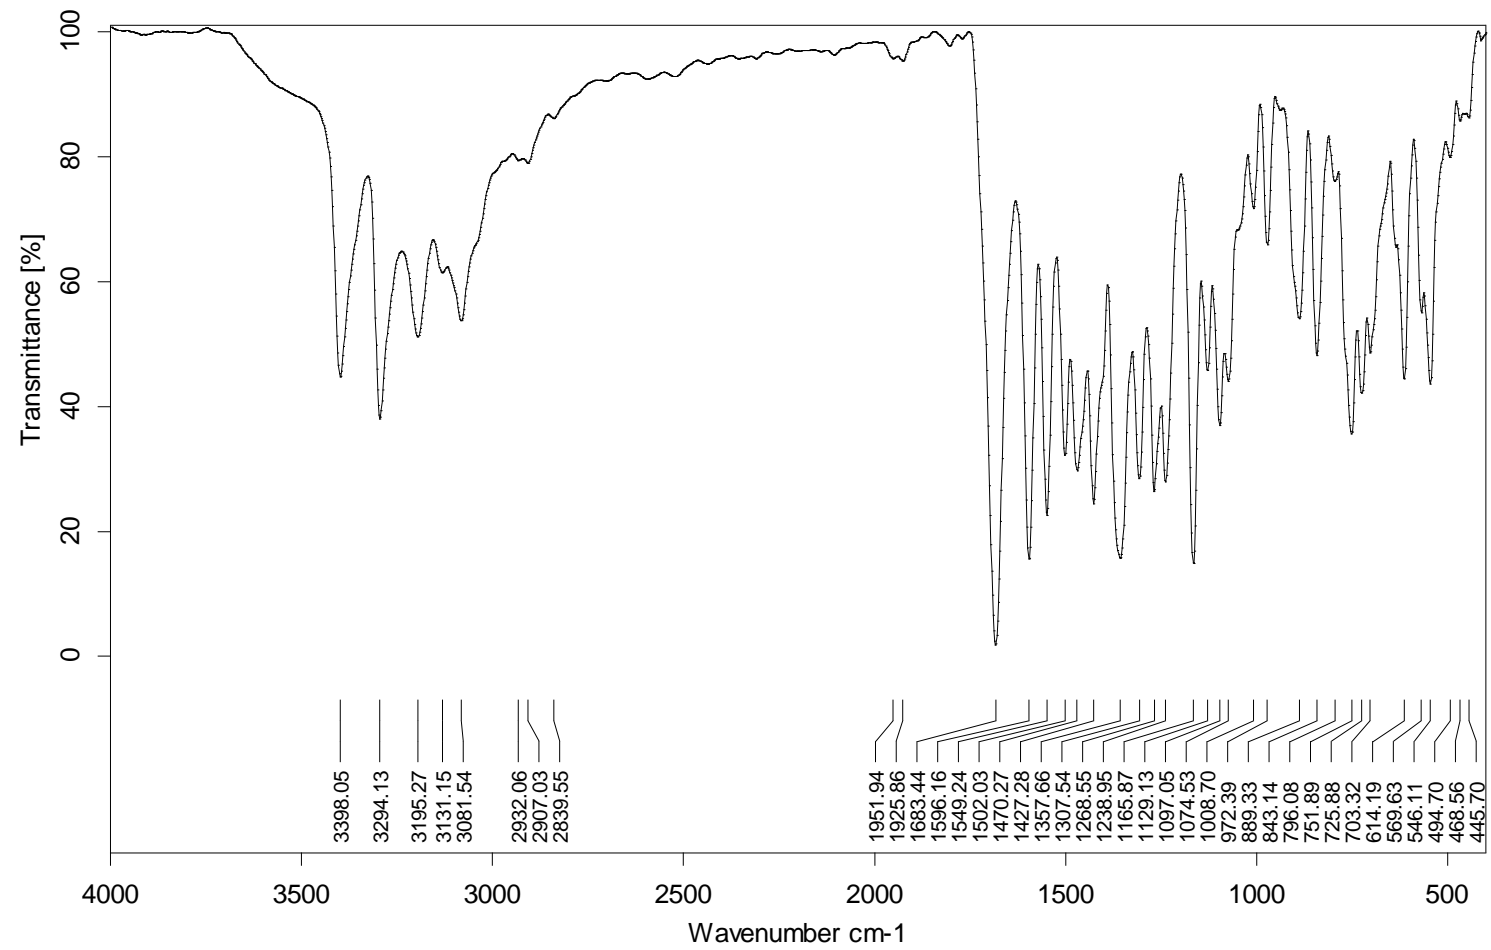

**Figure 44.** IR of 13a

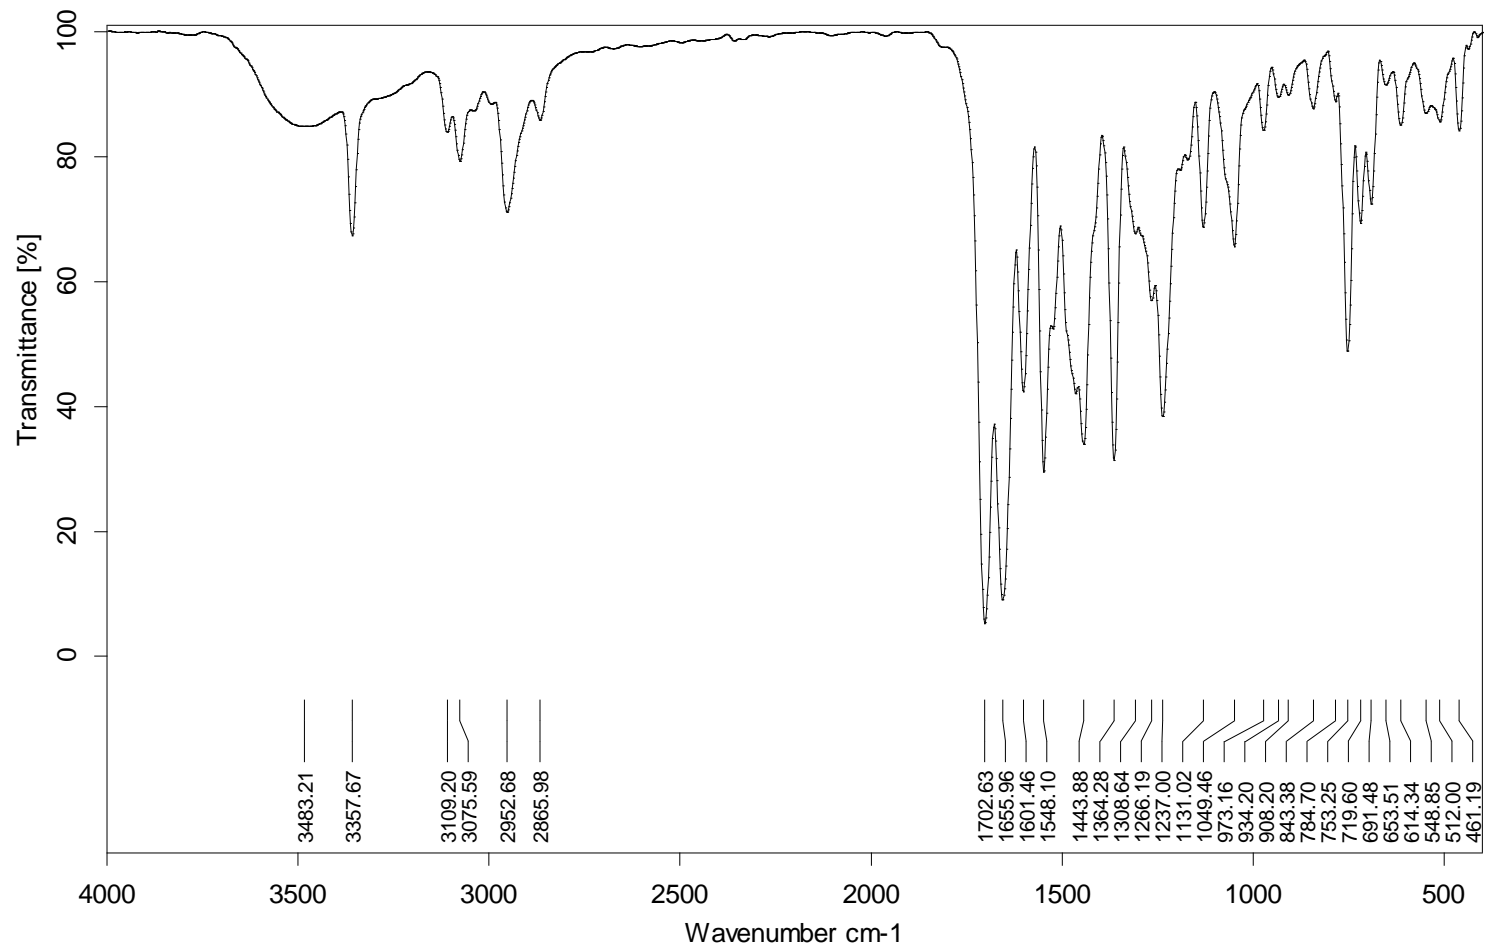

Figure 45. IR of 13b

### 3. Molecular modelling

**Table 1: 2D diagram and 3D representation of molecular docking of all compounds in the binding pocket (PDB: 7E3H).**

|    | <b>2D interactions with human AchE active site (PDB: 7E3H)</b> | <b>3D interactions with human AchE active site (PDB: 7E3H)</b> |
|----|----------------------------------------------------------------|----------------------------------------------------------------|
| 2a |                                                                |                                                                |
| 2b |                                                                |                                                                |



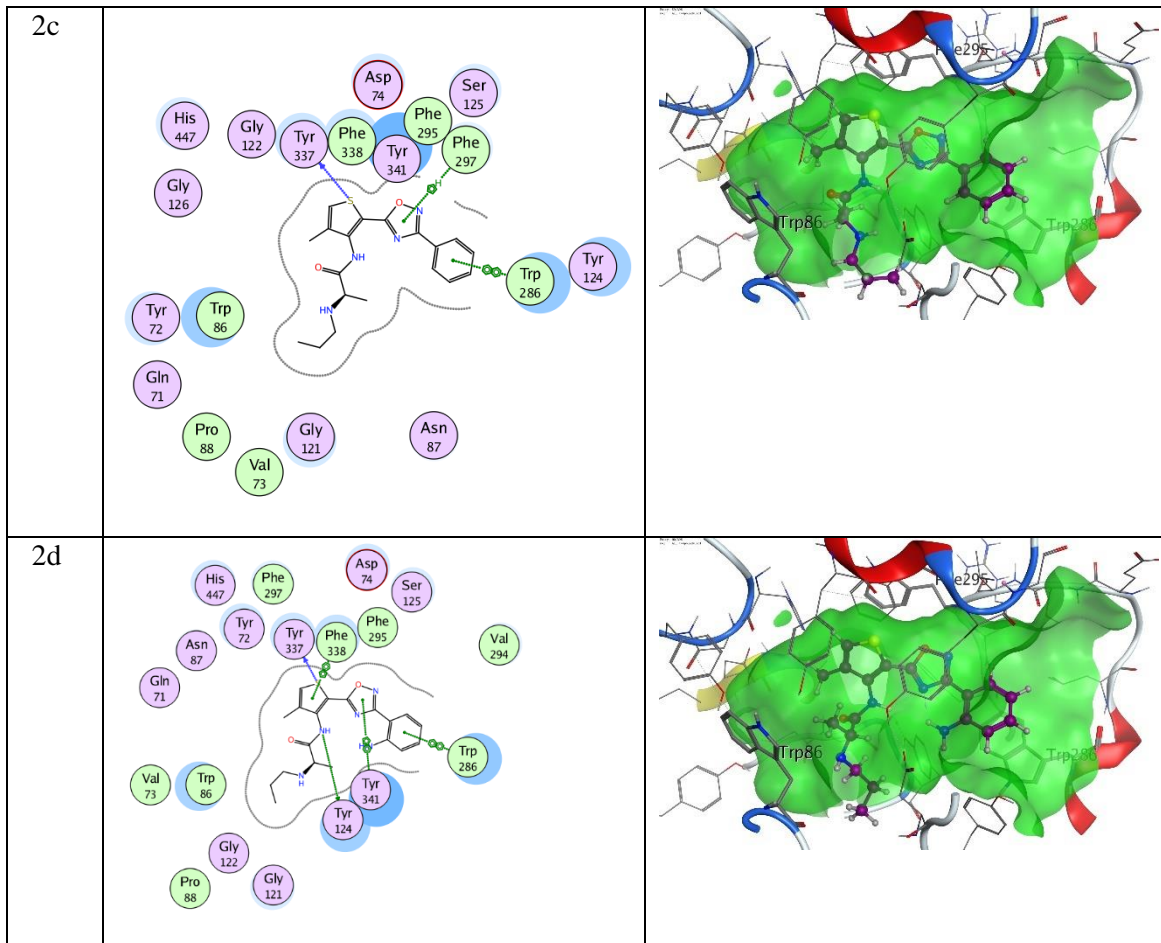

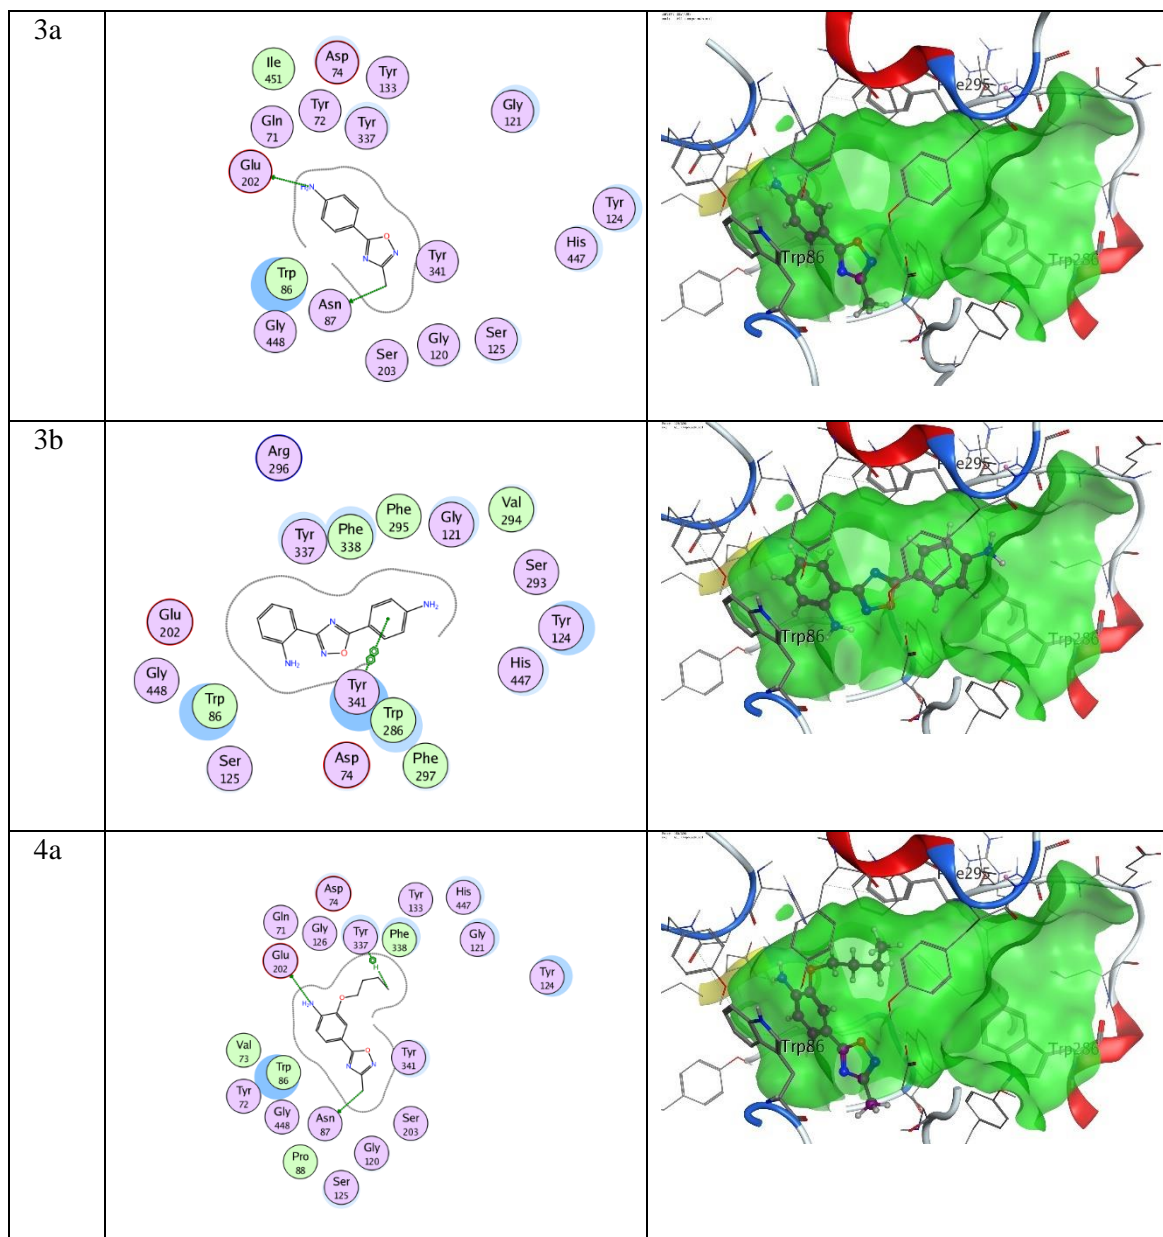

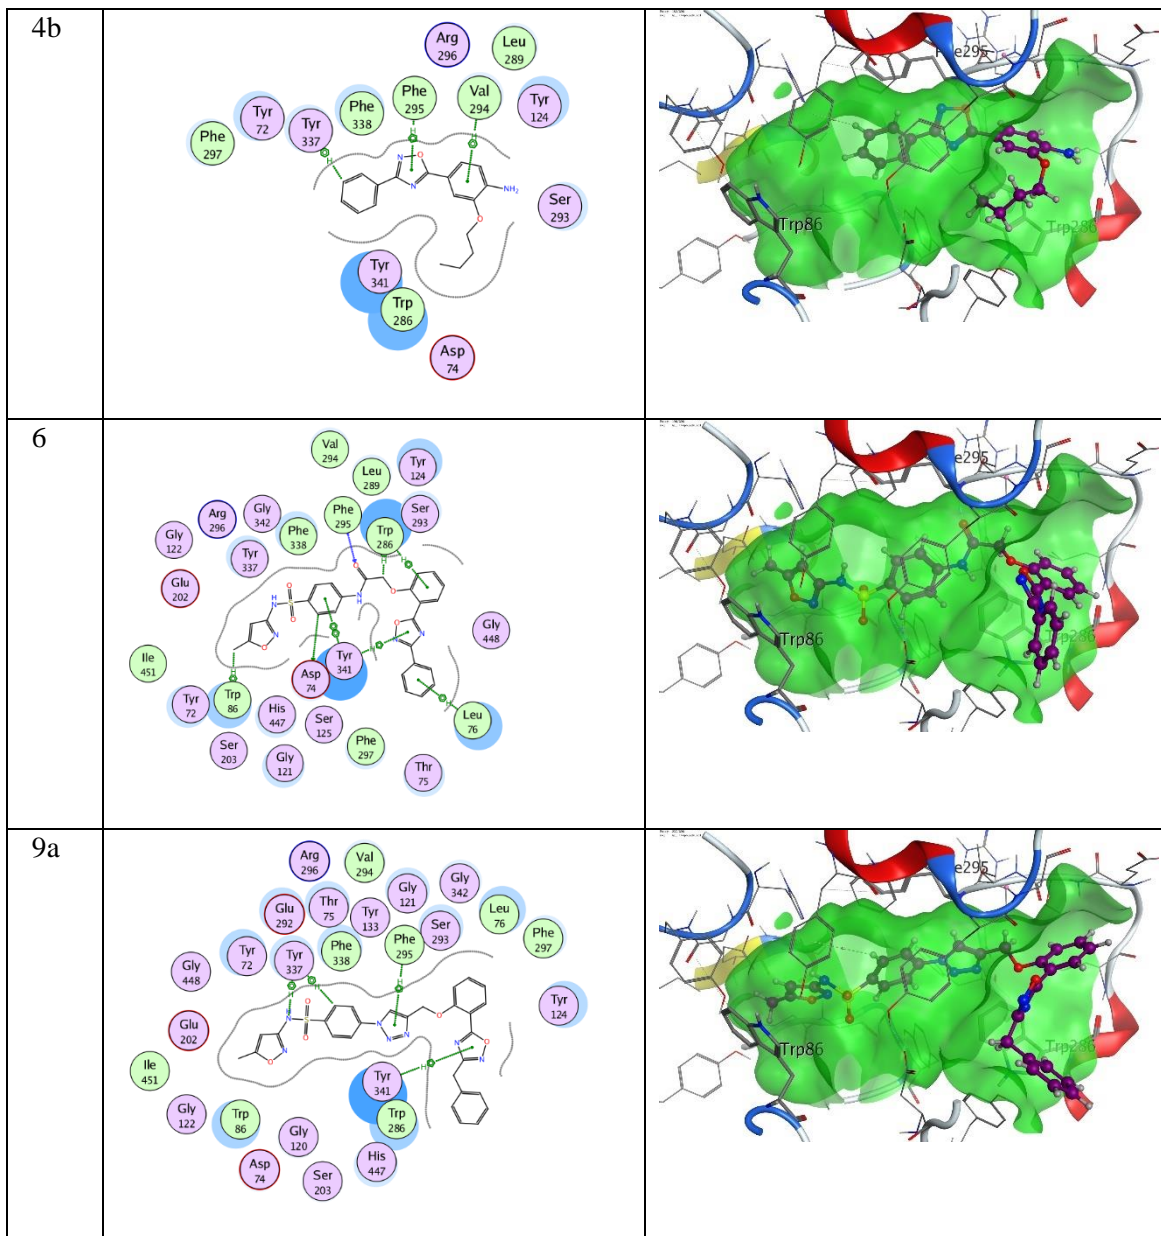

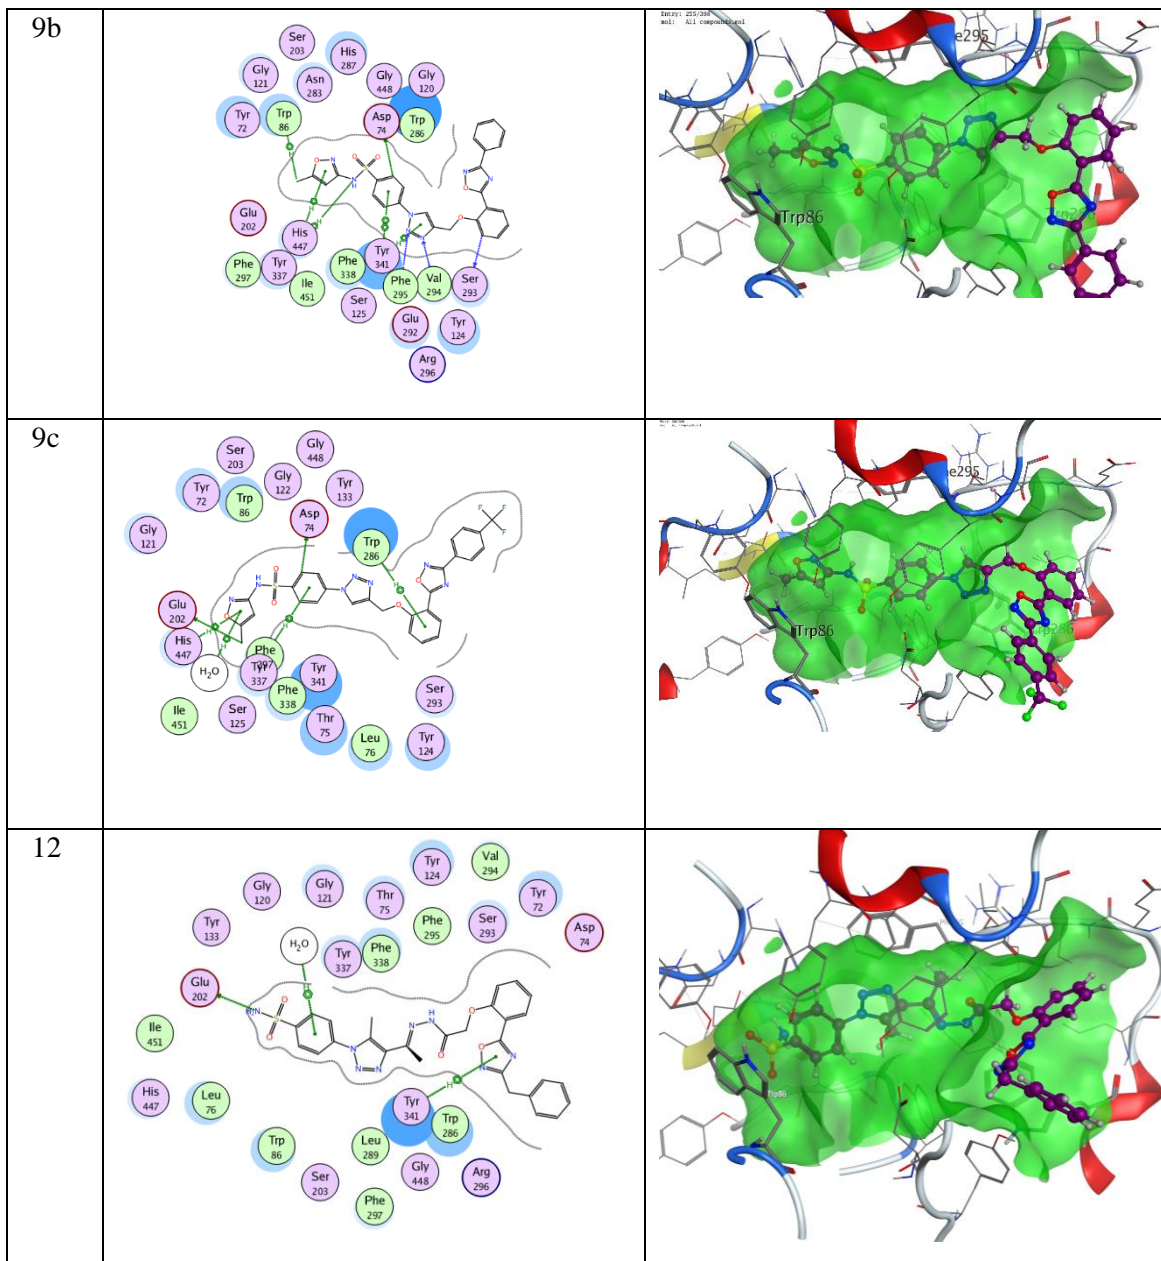

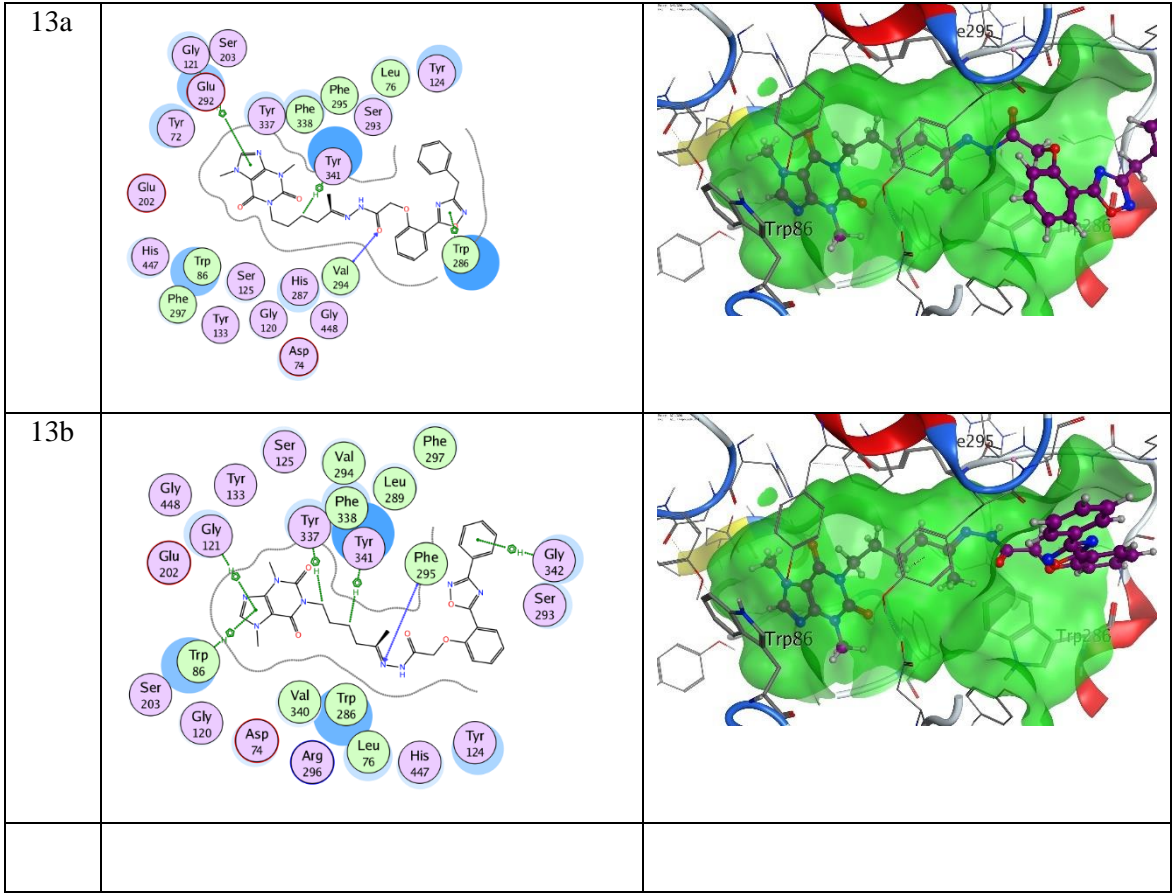

#### 4. ADME study

**Table 2. Physicochemical properties and ADME properties of the target compounds.**

| Compd                | MW (g/mol)<br><500 | #H-bond acceptors<br><10 | #H-bond donors<br><5 | TPSA (Å <sup>2</sup> )<br><140 | Log P o/w<br><5 | GI absorption | BBB permeant | Lipinski #violations | Bioavailability Score | PAINS #alerts |
|----------------------|--------------------|--------------------------|----------------------|--------------------------------|-----------------|---------------|--------------|----------------------|-----------------------|---------------|
| <b>2a</b>            | 308.4              | 5                        | 2                    | 108.29                         | 1.21            | High          | No           | 0                    | 0.55                  | 0             |
| <b>2b</b>            | 385.5              | 4                        | 2                    | 112.87                         | -1.26           | High          | No           | 0                    | 0.55                  | 0             |
| <b>2c</b>            | 370.47             | 5                        | 2                    | 108.29                         | 2.47            | High          | No           | 0                    | 0.55                  | 0             |
| <b>2d</b>            | 385.48             | 5                        | 3                    | 134.31                         | 1.94            | Low           | No           | 0                    | 0.55                  | 0             |
| <b>3a</b>            | 175.19             | 3                        | 1                    | 64.94                          | 1.08            | High          | Yes          | 0                    | 0.55                  | 0             |
| <b>3b</b>            | 252.27             | 3                        | 2                    | 90.96                          | 1.96            | High          | No           | 0                    | 0.55                  | 0             |
| <b>4a</b>            | 247.29             | 4                        | 1                    | 74.17                          | 1.67            | High          | Yes          | 0                    | 0.55                  | 0             |
| <b>4b</b>            | 309.36             | 4                        | 1                    | 74.17                          | 2.95            | High          | Yes          | 0                    | 0.55                  | 0             |
| <b>6</b>             | 531.54             | 9                        | 2                    | 157.83                         | 1.82            | Low           | No           | 2                    | 0.17                  | 0             |
| <b>9a</b>            | 569.59             | 10                       | 1                    | 159.44                         | 2.58            | Low           | No           | 2                    | 0.17                  | 0             |
| <b>9b</b>            | 555.56             | 10                       | 1                    | 159.44                         | 2.38            | Low           | No           | 2                    | 0.17                  | 0             |
| <b>9c</b>            | 623.56             | 13                       | 1                    | 159.44                         | 2.87            | Low           | No           | 2                    | 0.17                  | 0             |
| <b>12</b>            | 586.62             | 11                       | 2                    | 188.86                         | 1.87            | Low           | No           | 2                    | 0.17                  | 0             |
| <b>13a</b>           | 584.63             | 9                        | 1                    | 151.43                         | 2.29            | Low           | No           | 2                    | 0.17                  | 0             |
| <b>13b</b>           | 570.6              | 9                        | 1                    | 151.43                         | 2.09            | Low           | No           | 2                    | 0.17                  | 0             |
| <b>Donepezil HCl</b> | 379.49             | 4                        | 0                    | 38.77                          | 3.06            | High          | Yes          | 0                    | 0.55                  | 0             |

**5. Biological activities detailed results.**

**a) AChE inhibitory assay results**

| SAMPLE | %AChE INHIBITION | SD    | ng/ml    | nmole    | nM       |
|--------|------------------|-------|----------|----------|----------|
| 2c_1   | 0                | 0     | 2.083333 | 0.005623 | 5.623487 |
| 2c_2   | 0.436681223      | 0.202 | 4.166667 | 0.011247 | 11.24697 |
| 2c_3   | 5.676855895      | 0.274 | 8.333333 | 0.022494 | 22.49395 |
| 2c_4   | 24.45414847      | 0.214 | 16.66667 | 0.044988 | 44.9879  |
| 2c_5   | 41.92139738      | 0.237 | 33.33333 | 0.089976 | 89.9758  |
| 2b_1   | 0                | 0     | 2.083333 | 0.005418 | 5.418292 |
| 2b_2   | 6.986899563      | 0.21  | 4.166667 | 0.010837 | 10.83658 |
| 2b_3   | 24.45414847      | 0.242 | 8.333333 | 0.021673 | 21.67317 |
| 2b_4   | 70.74235808      | 0.28  | 16.66667 | 0.043346 | 43.34634 |
| 2b_5   | 75.98253275      | 0.302 | 33.33333 | 0.086693 | 86.69267 |
| 2d_1   | 18.77729258      | 0.234 | 2.083333 | 0.005404 | 5.404377 |
| 2d_2   | 23.58078603      | 0.217 | 4.166667 | 0.010809 | 10.80875 |
| 2d_3   | 31.44104803      | 0.283 | 8.333333 | 0.021618 | 21.61751 |
| 2d_4   | 36.24454148      | 0.261 | 16.66667 | 0.043235 | 43.23502 |
| 2d_5   | 39.30131004      | 0.237 | 33.33333 | 0.08647  | 86.47003 |
| 2a_1   | 2.183406114      | 0.216 | 2.083333 | 0.006755 | 6.755296 |
| 2a_2   | 3.056768559      | 0.225 | 4.166667 | 0.013511 | 13.51059 |
| 2a_3   | 8.296943231      | 0.234 | 8.333333 | 0.027021 | 27.02118 |
| 2a_4   | 16.59388646      | 0.234 | 16.66667 | 0.054042 | 54.04237 |
| 2a_5   | 26.20087336      | 0.237 | 33.33333 | 0.108085 | 108.0847 |
| 3a_1   | 2.620087336      | 0.236 | 2.083333 | 0.008258 | 8.25802  |
| 3a_2   | 10.48034934      | 0.221 | 4.166667 | 0.016516 | 16.51604 |
| 3a_3   | 24.45414847      | 0.259 | 8.333333 | 0.033032 | 33.03208 |
| 3a_4   | 51.09170306      | 0.294 | 16.66667 | 0.066064 | 66.06416 |
| 3a_5   | 53.27510917      | 0.276 | 33.33333 | 0.132128 | 132.1283 |
| 3b_1   | 0                | 0.23  | 2.083333 | 0.011892 | 11.89185 |

|      |              |       |          |          |          |
|------|--------------|-------|----------|----------|----------|
| 3b_2 | 0            | 0.22  | 4.166667 | 0.023784 | 23.7837  |
| 3b_3 | 0            | 0.201 | 8.333333 | 0.047567 | 47.5674  |
| 3b_4 | 33.18777293  | 0.238 | 16.66667 | 0.095135 | 95.13481 |
| 3b_5 | 43.23144105  | 0.239 | 33.33333 | 0.19027  | 190.2696 |
| 4a_1 | 18.34061135  | 0.279 | 2.083333 | 0.008424 | 8.424316 |
| 4a_2 | 25.76419214  | 0.236 | 4.166667 | 0.016849 | 16.84863 |
| 4a_3 | 47.59825328  | 0.272 | 8.333333 | 0.033697 | 33.69726 |
| 4a_4 | 54.14847162  | 0.255 | 16.66667 | 0.067395 | 67.39453 |
| 4a_5 | 86.02620087  | 0.428 | 33.33333 | 0.134789 | 134.7891 |
| 4b_1 | 24.01746725  | 0.502 | 2.083333 | 0.006742 | 6.742179 |
| 4b_2 | 47.16157205  | 0.256 | 4.166667 | 0.013484 | 13.48436 |
| 4b_3 | 79.91266376  | 0.499 | 8.333333 | 0.026969 | 26.96872 |
| 4b_4 | 84.71615721  | 0.388 | 16.66667 | 0.053937 | 53.93743 |
| 4b_5 | 85.15283843  | 0.317 | 33.33333 | 0.107875 | 107.8749 |
| 9a_1 | 0            | 0     | 2.083333 | 0.00375  | 3.749903 |
| 9a_2 | 0            | 0     | 4.166667 | 0.0075   | 7.499805 |
| 9a_3 | 3.930131004  | 0.241 | 8.333333 | 0.015    | 14.99961 |
| 9a_4 | 13.5371179   | 0.265 | 16.66667 | 0.029999 | 29.99922 |
| 9a_5 | 26.63755459  | 0.394 | 33.33333 | 0.059998 | 59.99844 |
| 9c_1 | 42.79475983  | 0.264 | 2.083333 | 0.003658 | 3.657537 |
| 9c_2 | 13.5371179   | 0.279 | 4.166667 | 0.007315 | 7.315075 |
| 9c_3 | -1.746724891 | 0.25  | 8.333333 | 0.01463  | 14.63015 |
| 9c_4 | -37.99126638 | 0.312 | 16.66667 | 0.02926  | 29.2603  |
| 9c_5 | -82.96943231 | 0.433 | 33.33333 | 0.058521 | 58.5206  |
| 6_1  | 4.366812227  | 0.244 | 2.083333 | 0.003341 | 3.340977 |
| 6_2  | 4.366812227  | 0.203 | 4.166667 | 0.006682 | 6.681955 |
| 6_3  | 6.550218341  | 0.228 | 8.333333 | 0.013364 | 13.36391 |
| 6_4  | 21.83406114  | 0.217 | 16.66667 | 0.026728 | 26.72782 |
| 6_5  | 32.31441048  | 0.222 | 33.33333 | 0.053456 | 53.45564 |
| 12_1 | 0            | 0     | 2.083333 | 0.003919 | 3.919429 |



|                            |              |       |          |          |          |
|----------------------------|--------------|-------|----------|----------|----------|
| <b>12_2</b>                | -2.183406114 | 0.265 | 4.166667 | 0.007839 | 7.838858 |
| <b>12_3</b>                | -12.66375546 | 0.321 | 8.333333 | 0.015678 | 15.67772 |
| <b>12_4</b>                | -17.03056769 | 0.39  | 16.66667 | 0.031355 | 31.35543 |
| <b>12_5</b>                | -32.7510917  | 0.537 | 33.33333 | 0.062711 | 62.71087 |
| <b>3b_1</b>                | 33.18777293  | 0.228 | 2.083333 | 0.003551 | 3.551358 |
| <b>3b_2</b>                | 21.39737991  | 0.23  | 4.166667 | 0.007103 | 7.102717 |
| <b>3b_3</b>                | 11.79039301  | 0.252 | 8.333333 | 0.014205 | 14.20543 |
| <b>3b_4</b>                | 9.170305677  | 0.23  | 16.66667 | 0.028411 | 28.41087 |
| <b>3b_5</b>                | 3.493449782  | 0.42  | 33.33333 | 0.056822 | 56.82173 |
| <b>3a_1</b>                | 0            | 0     | 2.083333 | 0.003563 | 3.563446 |
| <b>3a_2</b>                | 0            | 0     | 4.166667 | 0.007127 | 7.126893 |
| <b>3a_3</b>                | -34.06113537 | 0.195 | 8.333333 | 0.014254 | 14.25379 |
| <b>3a_4</b>                | -55.45851528 | 0.212 | 16.66667 | 0.028508 | 28.50757 |
| <b>3a_5</b>                | -81.65938865 | 0.502 | 33.33333 | 0.057015 | 57.01514 |
| <b>9b_1</b>                | -13.5371179  | 0.268 | 2.083333 | 0.003651 | 3.651063 |
| <b>9b_2</b>                | -9.6069869   | 0.288 | 4.166667 | 0.007302 | 7.302127 |
| <b>9b_3</b>                | 2.620087336  | 0.217 | 8.333333 | 0.014604 | 14.60425 |
| <b>9b_4</b>                | 9.6069869    | 0.416 | 16.66667 | 0.029209 | 29.20851 |
| <b>9b_5</b>                | 10.04        | 0.306 | 33.33333 | 0.058417 | 58.41702 |
|                            |              |       |          |          |          |
| <b>donepezil<br/>HCl_1</b> | 3.930131004  | 0.241 | 2.083333 | 0.005008 | 5.008013 |
| <b>donepezil<br/>HCl_2</b> | 7.860262009  | 0.252 | 4.166667 | 0.010016 | 10.01603 |
| <b>donepezil<br/>HCl_3</b> | 45.85152838  | 0.472 | 8.333333 | 0.020032 | 20.03205 |
| <b>donepezil<br/>HCl_4</b> | 50.65502183  | 0.339 | 16.66667 | 0.040064 | 40.0641  |
| <b>donepezil<br/>HCl_5</b> | 51.52838428  | 1.327 | 33.33333 | 0.080128 | 80.12821 |

**b) 1,1-Diphenyl-2-picrylhydrazyl (DPPH) radical scavenging activity results**

| SAMPLE | DPPH<br>SCAVENGING% | SD   | ug/ml | umole    | uM       |
|--------|---------------------|------|-------|----------|----------|
| 2c_1   | 2.88                | 0.1  | 6.25  | 0.005501 | 5.501422 |
| 2c_2   | 7.00                | 0.3  | 12.5  | 0.011003 | 11.00284 |
| 2c_3   | 11.11               | 0.4  | 25    | 0.022006 | 22.00569 |
| 2c_4   | 13.99               | 0.3  | 50    | 0.044011 | 44.01137 |
| 2c_5   | 14.20               | 0.5  | 100   | 0.088023 | 88.02275 |
| 2b_1   | 4.94                | 0.1  | 6.25  | 0.011219 | 11.21942 |
| 2b_2   | 6.38                | 0.05 | 12.5  | 0.022439 | 22.43883 |
| 2b_3   | 8.44                | 0.03 | 25    | 0.044878 | 44.87766 |
| 2b_4   | 10.91               | 0.8  | 50    | 0.089755 | 89.75533 |
| 2b_5   | 13.37               | 0.4  | 100   | 0.179511 | 179.5107 |
| 2d_1   | 4.32                | 0.01 | 6.25  | 0.004448 | 4.44824  |
| 2d_2   | 4.94                | 0.03 | 12.5  | 0.008896 | 8.896481 |
| 2d_3   | 9.67                | 0.08 | 25    | 0.017793 | 17.79296 |
| 2d_4   | 13.58               | 1.1  | 50    | 0.035586 | 35.58592 |
| 2d_5   | 15.64               | 1.2  | 100   | 0.071172 | 71.17184 |
| 2a_1   | 7.82                | 0.07 | 6.25  | 0.003361 | 3.360757 |
| 2a_2   | 8.02                | 0.08 | 12.5  | 0.006722 | 6.721514 |
| 2a_3   | 8.64                | 0.1  | 25    | 0.013443 | 13.44303 |
| 2a_4   | 10.08               | 1.1  | 50    | 0.026886 | 26.88606 |
| 2a_5   | 15.64               | 0.9  | 100   | 0.053772 | 53.77211 |
| 3a_1   | 2.47                | 0.02 | 6.25  | 0.00793  | 7.930063 |
| 3a_2   | 11.11               | 1.1  | 12.5  | 0.01586  | 15.86013 |
| 3a_3   | 12.55               | 0.9  | 25    | 0.03172  | 31.72025 |
| 3a_4   | 16.46               | 0.8  | 50    | 0.063441 | 63.44051 |
| 3a_5   | 21.40               | 1.8  | 100   | 0.126881 | 126.881  |

|      |       |       |      |          |          |
|------|-------|-------|------|----------|----------|
| 3b_1 | 0.00  | 0     | 6.25 | 0.005925 | 5.925294 |
| 3b_2 | 1.65  | 0.003 | 12.5 | 0.011851 | 11.85059 |
| 3b_3 | 7.61  | 0.1   | 25   | 0.023701 | 23.70118 |
| 3b_4 | 9.47  | 0.2   | 50   | 0.047402 | 47.40235 |
| 3b_5 | 11.52 | 0.4   | 100  | 0.094805 | 94.8047  |
| 4a_1 | 0.00  | 0     | 6.25 | 0.053355 | 53.35496 |
| 4a_2 | 6.17  | 0.03  | 12.5 | 0.10671  | 106.7099 |
| 4a_3 | 6.58  | 0.5   | 25   | 0.21342  | 213.4198 |
| 4a_4 | 13.17 | 0.3   | 50   | 0.42684  | 426.8397 |
| 4a_5 | 17.49 | 0.4   | 100  | 0.853679 | 853.6794 |
| 4b_1 | 31.69 | 0.1   | 6.25 | 0.003534 | 3.534168 |
| 4b_2 | 49.79 | 0.3   | 12.5 | 0.007068 | 7.068337 |
| 4b_3 | 60.29 | 0.6   | 25   | 0.014137 | 14.13667 |
| 4b_4 | 72.63 | 1.5   | 50   | 0.028273 | 28.27335 |
| 4b_5 | 78.81 | 1.9   | 100  | 0.056547 | 56.54669 |
| 9a_1 | 5.14  | 0.05  | 6.25 | 0.003534 | 3.534168 |
| 9a_2 | 8.02  | 0.03  | 12.5 | 0.007068 | 7.068337 |
| 9a_3 | 11.11 | 1.1   | 25   | 0.014137 | 14.13667 |
| 9a_4 | 11.93 | 0.03  | 50   | 0.028273 | 28.27335 |
| 9a_5 | 17.08 | 1.1   | 100  | 0.056547 | 56.54669 |
| 9c_1 | 0.00  | 0     | 6.25 | 0.010973 | 10.97261 |
| 9c_2 | 0.00  | 0     | 12.5 | 0.021945 | 21.94522 |
| 9c_3 | 4.12  | 0.01  | 25   | 0.04389  | 43.89045 |
| 9c_4 | 6.79  | 0.2   | 50   | 0.087781 | 87.7809  |
| 9c_5 | 9.47  | 0.3   | 100  | 0.175562 | 175.5618 |
| 6_1  | 0.00  |       | 6.25 | 0.00415  | 4.150397 |
| 6_2  | 0.00  |       | 12.5 | 0.008301 | 8.300794 |
| 6_3  | 0.00  |       | 25   | 0.016602 | 16.60159 |
| 6_4  | 2.06  | 0.03  | 50   | 0.033203 | 33.20318 |
| 6_5  | 5.76  | 0.05  | 100  | 0.066406 | 66.40635 |

|      |       |       |      |          |          |
|------|-------|-------|------|----------|----------|
| 12_1 | 10.49 | 0.06  | 6.25 | 0.011758 | 11.75829 |
| 12_2 | 13.58 | 0.4   | 12.5 | 0.023517 | 23.51657 |
| 12_3 | 17.08 | 0.9   | 25   | 0.047033 | 47.03315 |
| 12_4 | 17.28 | 0.8   | 50   | 0.094066 | 94.0663  |
| 12_5 | 18.72 | 1.1   | 100  | 0.188133 | 188.1326 |
| 3b_1 | 8.64  | 0.05  | 6.25 | 0.003782 | 3.781851 |
| 3b_2 | 10.91 | 0.03  | 12.5 | 0.007564 | 7.563701 |
| 3b_3 | 14.20 | 1.4   | 25   | 0.015127 | 15.1274  |
| 3b_4 | 15.43 | 1.2   | 50   | 0.030255 | 30.25481 |
| 3b_5 | 18.52 | 1.8   | 100  | 0.06051  | 60.50961 |
| 3a_1 | 10.70 | 0.8   | 6.25 | 0.01069  | 10.69034 |
| 3a_2 | 12.14 | 0.6   | 12.5 | 0.021381 | 21.38068 |
| 3a_3 | 14.40 | 0.9   | 25   | 0.042761 | 42.76136 |
| 3a_4 | 15.84 | 0.8   | 50   | 0.085523 | 85.52271 |
| 3a_5 | 21.60 | 2.1   | 100  | 0.171045 | 171.0454 |
| 9b_1 | 1.97  | 0.003 | 6.25 | 0.003594 | 3.59375  |
| 9b_2 | 4.18  | 0.1   | 12.5 | 0.007188 | 7.1875   |
| 9b_3 | 9.21  | 0.8   | 25   | 0.014375 | 14.375   |
| 9b_4 | 10.93 | 0.8   | 50   | 0.02875  | 28.75    |
| 9b_5 | 17.44 | 1.2   | 100  | 0.0575   | 57.5     |

**c) MAO-B inhibitory assay results**

| SAMPLE | % INHIBITION | SD       | ug/ml    | umole    | uM       |
|--------|--------------|----------|----------|----------|----------|
| 2c_1   | -8.67362E-14 | 3.00E-17 | 8.928571 | 0.024101 | 24.10066 |
| 2c_2   | -8.67362E-14 | 7.00E-17 | 17.85714 | 0.048201 | 48.20132 |
| 2c_3   | 20           | 1.1      | 35.71429 | 0.096403 | 96.40264 |
| 2c_4   | 60           | 3.2      | 71.42857 | 0.192805 | 192.8053 |
| 2c_5   | 80           | 4.1      | 142.8571 | 0.385611 | 385.6106 |

|             |              |          |          |          |          |
|-------------|--------------|----------|----------|----------|----------|
| <b>2b_1</b> | 20           | 0.9      | 8.928571 | 0.023221 | 23.22125 |
| <b>2b_2</b> | 40           | 1.4      | 17.85714 | 0.046443 | 46.4425  |
| <b>2b_3</b> | 40           | 1.6      | 35.71429 | 0.092885 | 92.88501 |
| <b>2b_4</b> | 40           | 2.3      | 71.42857 | 0.18577  | 185.77   |
| <b>2b_5</b> | 40           | 3.7      | 142.8571 | 0.37154  | 371.54   |
| <b>2d_1</b> | -8.67362E-14 | 4.00E-19 | 8.928571 | 0.023162 | 23.16162 |
| <b>2d_2</b> | -8.67362E-14 | 3.00E-17 | 17.85714 | 0.046323 | 46.32323 |
| <b>2d_3</b> | 20           | 0.8      | 35.71429 | 0.092646 | 92.64646 |
| <b>2d_4</b> | 40           | 1.7      | 71.42857 | 0.185293 | 185.2929 |
| <b>2d_5</b> | 60           | 3.5      | 142.8571 | 0.370586 | 370.5859 |
| <b>2a_1</b> | 2.13371E-12  | 1.00E-17 | 8.928571 | 0.028951 | 28.95127 |
| <b>2a_2</b> | -8.67362E-14 | 4.00E-16 | 17.85714 | 0.057903 | 57.90254 |
| <b>2a_3</b> | -40          | 2.1      | 35.71429 | 0.115805 | 115.8051 |
| <b>2a_4</b> | -60          | 3.1      | 71.42857 | 0.23161  | 231.6102 |
| <b>2a_5</b> | -60          | 2.7      | 142.8571 | 0.46322  | 463.2203 |
| <b>3a_1</b> | -8.67362E-14 | 3.00E-17 | 8.928571 | 0.035392 | 35.39152 |
| <b>3a_2</b> | -8.67362E-14 | 4.00E-17 | 17.85714 | 0.070783 | 70.78303 |
| <b>3a_3</b> | -20          | 1.7      | 35.71429 | 0.141566 | 141.5661 |
| <b>3a_4</b> | -40          | 1.2      | 71.42857 | 0.283132 | 283.1321 |
| <b>3a_5</b> | -80          | 2.4      | 142.8571 | 0.566264 | 566.2642 |
| <b>3b_1</b> | -8.67362E-14 | 3.00E-17 | 8.928571 | 0.050965 | 50.96507 |
| <b>3b_2</b> | -40          | 3.1      | 17.85714 | 0.10193  | 101.9301 |
| <b>3b_3</b> | -100         | 3.5      | 35.71429 | 0.20386  | 203.8603 |
| <b>3b_4</b> | -120         | 8.4      | 71.42857 | 0.407721 | 407.7206 |
| <b>3b_5</b> | -140         | 6.3      | 142.8571 | 0.815441 | 815.4412 |

|      |              |          |          |          |          |
|------|--------------|----------|----------|----------|----------|
| 4a_1 | -80          | 4.5      | 8.928571 | 0.036104 | 36.10421 |
| 4a_2 | -80          | 4.7      | 17.85714 | 0.072208 | 72.20842 |
| 4a_3 | -140         | 6.7      | 35.71429 | 0.144417 | 144.4168 |
| 4a_4 | -140         | 6.7      | 71.42857 | 0.288834 | 288.8337 |
| 4a_5 | -200         | 9.4      | 142.8571 | 0.577667 | 577.6674 |
| 4b_1 | -8.67362E-14 | 3.00E-17 | 8.928571 | 0.028895 | 28.89505 |
| 4b_2 | -40          | 3.4      | 17.85714 | 0.05779  | 57.79011 |
| 4b_3 | -60          | 5.1      | 35.71429 | 0.11558  | 115.5802 |
| 4b_4 | -140         | 11.3     | 71.42857 | 0.23116  | 231.1604 |
| 4b_5 | -160         | 12.1     | 142.8571 | 0.462321 | 462.3209 |
| 9a_1 | -40          | 0.8      | 8.928571 | 0.016071 | 16.07101 |
| 9a_2 | -60          | 3.4      | 17.85714 | 0.032142 | 32.14202 |
| 9a_3 | -140         | 9.7      | 35.71429 | 0.064284 | 64.28404 |
| 9a_4 | -180         | 8.6      | 71.42857 | 0.128568 | 128.5681 |
| 9a_5 | -180         | 10.6     | 142.8571 | 0.257136 | 257.1362 |
| 9c_1 | -80          | 7.5      | 8.928571 | 0.015675 | 15.67516 |
| 9c_2 | -80          | 6.8      | 17.85714 | 0.03135  | 31.35032 |
| 9c_3 | -100         | 9.4      | 35.71429 | 0.062701 | 62.70064 |
| 9c_4 | -160         | 8.7      | 71.42857 | 0.125401 | 125.4013 |
| 9c_5 | -180         | 11.2     | 142.8571 | 0.250803 | 250.8026 |
| 6_1  | -8.67362E-14 | 3.00E-17 | 8.928571 | 0.014318 | 14.31847 |
| 6_2  | -20          | 1.1      | 17.85714 | 0.028637 | 28.63695 |
| 6_3  | -80          | 2.5      | 35.71429 | 0.057274 | 57.2739  |
| 6_4  | -120         | 6.4      | 71.42857 | 0.114548 | 114.5478 |
| 6_5  | -200         | 11.7     | 142.8571 | 0.229096 | 229.0956 |
| 12_1 | -80          | 4.5      | 8.928571 | 0.016798 | 16.79755 |
| 12_2 | -100         | 6.3      | 17.85714 | 0.033595 | 33.59511 |
| 12_3 | -120         | 12.3     | 35.71429 | 0.06719  | 67.19021 |
| 12_4 | -120         | 10.4     | 71.42857 | 0.13438  | 134.3804 |

|             |              |          |          |          |          |
|-------------|--------------|----------|----------|----------|----------|
| <b>12_5</b> | -140         | 10.6     | 142.8571 | 0.268761 | 268.7609 |
| <b>3b_1</b> | -8.67362E-14 | 7.00E-17 | 8.928571 | 0.01522  | 15.22011 |
| <b>3b_2</b> | -40          | 1.6      | 17.85714 | 0.03044  | 30.44021 |
| <b>3b_3</b> | -100         | 7.8      | 35.71429 | 0.06088  | 60.88043 |
| <b>3b_4</b> | -160         | 6.7      | 71.42857 | 0.121761 | 121.7609 |
| <b>3b_5</b> | -180         | 11.3     | 142.8571 | 0.243522 | 243.5217 |
| <b>3a_1</b> | -40          | 4.3      | 8.928571 | 0.015272 | 15.27191 |
| <b>3a_2</b> | -60          | 6.4      | 17.85714 | 0.030544 | 30.54383 |
| <b>3a_3</b> | -80          | 4.8      | 35.71429 | 0.061088 | 61.08765 |
| <b>3a_4</b> | -80          | 6.8      | 71.42857 | 0.122175 | 122.1753 |
| <b>3a_5</b> | -100         | 9.6      | 142.8571 | 0.244351 | 244.3506 |
| <b>9b_1</b> | -20          | 1.2      | 8.928571 | 0.015647 | 15.64741 |
| <b>9b_2</b> | -80          | 6.5      | 17.85714 | 0.031295 | 31.29483 |
| <b>9b_3</b> | -100         | 8.7      | 35.71429 | 0.06259  | 62.58966 |
| <b>9b_4</b> | -100         | 9.6      | 71.42857 | 0.125179 | 125.1793 |
| <b>9b_5</b> | -120         | 8.7      | 142.8571 | 0.250359 | 250.3586 |
